# 1 **The *Glossina* Genome Cluster: Comparative Genomic Analysis of the Vectors of African** 2 **Trypanosomes**

## 3 **Authorship:**

4 Geoffrey M. Attardo, (gmattardo@ucdavis.edu)<sup>\*22</sup>; Adly M.M. Abd-Alla, (a.m.m.abd-  
5 alla@iaea.org)<sup>13</sup>; Alvaro Acosta-Serrano, (alvaro.acosta-serrano@lstm.ac.uk)<sup>16</sup>; James E.  
6 Allen, (jallen@ebi.ac.uk)<sup>6</sup>; Rosemary Bateta, (batetarw@gmail.com)<sup>2</sup>; Joshua B. Benoit,  
7 (joshua.benoit@uc.edu)<sup>24</sup>; Kostas Bourtzis, (K.Bourtzis@iaea.org)<sup>13</sup>; Jelle Caers,  
8 (jellecrs@gmail.com)<sup>15</sup>; Guy Caljon, (Guy.Caljon@uantwerpen.be)<sup>21</sup>; Mikkel B. Christensen,  
9 (mikkel@ebi.ac.uk)<sup>6</sup>; David W. Farrow, (farrowdw@mail.uc.edu)<sup>24</sup>; Markus Friedrich,  
10 (friedrichwsu@gmail.com)<sup>33</sup>; Aurélie Hua-Van, (aurelie.hua-van@egce.cnrs-gif.fr)<sup>5</sup>; Emily C.  
11 Jennings, (jenninec@mail.uc.edu)<sup>24</sup>; Denis M. Larkin, (dmlarkin@gmail.com)<sup>19</sup>; Daniel Lawson,  
12 (daniel.lawson@imperial.ac.uk)<sup>10</sup>; Michael J. Lehane, (mike.lehane@lstm.ac.uk)<sup>16</sup>; Vasileios  
13 P. Lenis, (vasilis.lenis@plymouth.ac.uk)<sup>30</sup>; Ernesto Lowy-Gallego, (ernesto@ebi.ac.uk)<sup>6</sup>;  
14 Rosaline W. Macharia, (rwanjiru@icipe.org, rslnmacharia1@gmail.com)<sup>27,12</sup>; Anna R. Malacrida,  
15 (malacrid@unipv.it)<sup>29</sup>; Heather G. Marco, (heather.marco@uct.ac.za)<sup>23</sup>; Daniel Masiga,  
16 (dmasiga@icipe.org)<sup>12</sup>; Gareth L. Maslen, (gmaslen@ebi.ac.uk)<sup>6</sup>; Irina Matetovici,  
17 (imatetovovici@itg.be)<sup>11</sup>; Richard P. Meisel, (rpmeisel@uh.edu)<sup>25</sup>; Irene Meki  
18 (irene\_meki@yahoo.com)<sup>13</sup>, Veronika Michalkova, (vmichalk@fiu.edu,  
19 vmichalkova@yahoo.com)<sup>7,20</sup>; Wolfgang J. Miller, (wolfgang.miller@meduniwien.ac.at)<sup>17</sup>; Patrick  
20 Minx, (pminx@genome.wustl.edu)<sup>32</sup>; Paul O. Mireji, (mireji.paul@gmail.com)<sup>2,14</sup>; Lino Ometto,  
21 (lino.ometto@unipv.it)<sup>8,29</sup>; Andrew G. Parker, (a.g.parker@iaea.org)<sup>13</sup>; Rita Rio,  
22 (Rita.Rio@mail.wvu.edu)<sup>34</sup>; Clair Rose, (clair.rose@lstm.ac.uk)<sup>16</sup>; Andrew J. Rosendale,  
23 (andrew.rosendale@msj.edu)<sup>18,24</sup>; Omar Rota-Stabelli, (omar.rota@fmach.it)<sup>8</sup>; Grazia Savini,  
24 (grazia.savini01@universitadipavia.it)<sup>29</sup>; Liliane Schoofs, (liliane.schoofs@kuleuven.be)<sup>15</sup>;  
25 Francesca Scolari, (francesca.scolari@unipv.it)<sup>29</sup>; Martin T. Swain, (mts11@aber.ac.uk)<sup>1</sup>; Peter

26 Takáč, (peter.takac@savba.sk, Peter@scientica.sk)<sup>31</sup>; Chad Tomlinson,  
27 (ctomlins@wustl.edu)<sup>32</sup>; George Tsiamis, (gtsiamis1@gmail.com)<sup>28</sup>; Jan Van Den Abbeele,  
28 (jvdabeele@itg.be)<sup>11</sup>; Aurelien Vigneron, (aurelien.vigneron@yale.edu)<sup>35</sup>; Jingwen Wang,  
29 (jingwenwang@fudan.edu.cn)<sup>9</sup>; Wesley C. Warren, (warrenwc@missouri.edu)<sup>32,36</sup>; Robert M.  
30 Waterhouse, (robert.waterhouse@unil.ch)<sup>26</sup>; Matthew T. Weirauch,  
31 (matthew.weirauch@cchmc.org)<sup>4</sup>; Brian L. Weiss, (brian.weiss@yale.edu)<sup>35</sup>; Richard K Wilson,  
32 (rwilson@genome.wustl.edu)<sup>32</sup>; Xin Zhao, (kitty.zhaoxin@foxmail.com)<sup>3</sup>; Serap Aksoy,  
33 (serap.aksoy@yale.edu)<sup>\*35</sup>

34 \* - Corresponding Authors

35 **Author Affiliations:**

36 1: Institute of Biological, Environmental and Rural Sciences, Aberystwyth University,  
37 Aberystwyth, Ceredigion, United Kingdom

38 2: Department of Biochemistry, Biotechnology Research Institute - Kenya Agricultural and  
39 Livestock Research Organization, Kikuyu, Kenya

40 3: CAS Center for Influenza Research and Early-warning (CASCIRE), Chinese Academy of  
41 Sciences, Beijing, China

42 4: Center for Autoimmune Genomics and Etiology and Divisions of Biomedical Informatics and  
43 Developmental Biology, Cincinnati Children's Hospital Medical Center, Cincinnati, Ohio, United  
44 States

45 5: Laboratoire Evolution, Genomes, Comportement, Ecologie, CNRS, IRD, Univ. Paris-Sud,  
46 Université Paris-Saclay, Gif-sur-Yvette, France

47 6: VectorBase, European Molecular Biology Laboratory, European Bioinformatics Institute  
48 (EMBL-EBI), Cambridge, Cambridgeshire, United Kingdom

- 49 7: Department of Biological Sciences, Florida International University, Miami, Florida, United  
50 States
- 51 8: Department of Sustainable Ecosystems and Bioresources, Research and Innovation Centre,  
52 Fondazione Edmund Mach, San Michele all'Adige (TN), Italy
- 53 9: School of Life Sciences, Fudan University, Shanghai, China
- 54 10: Department of Life Sciences, Imperial College London, London, United Kingdom
- 55 11: Biomedical Sciences, Institute of Tropical Medicine, Antwerp, Belgium
- 56 12: Molecular Biology and Bioinformatics Unit, International Center for Insect Physiology and  
57 Ecology, Nairobi, Kenya
- 58 13: Insect Pest Control Laboratory, Joint FAO/IAEA Division of Nuclear Techniques in Food &  
59 Agriculture, Vienna, Vienna, Austria
- 60 14: Centre for Geographic Medicine Research, Coast, Kenya Medical Research Institute, Kilifi,  
61 Kenya
- 62 15: Department of Biology - Functional Genomics and Proteomics Group, KU Leuven, Leuven,  
63 Belgium
- 64 16: Department of Vector Biology, Liverpool School of Tropical Medicine, Liverpool, Merseyside,  
65 United Kingdom
- 66 17: Department of Cell and Developmental Biology, Medical University of Vienna, Vienna,  
67 Austria
- 68 18: Department of Biology, Mount St. Joseph University, Cincinnati, Ohio, United States
- 69 19: Department of Comparative Biomedical Sciences, Royal Veterinary College, London, United  
70 Kingdom
- 71 20: Institute of Zoology, Slovak Academy of Sciences, Bratislava, Slovakia

- 72 21: Laboratory of Microbiology, Parasitology and Hygiene, University of Antwerp, Antwerp,  
73 Belgium
- 74 22: Department of Entomology and Nematology, University of California, Davis, Davis,  
75 California, United States
- 76 23: Department of Biological Sciences, University of Cape Town, Rondebosch, South Africa
- 77 24: Department of Biological Sciences, University of Cincinnati, Cincinnati, Ohio, United States
- 78 25: Department of Biology and Biochemistry, University of Houston, Houston, Texas, United  
79 States
- 80 26: Department of Ecology & Evolution, and Swiss Institute of Bioinformatics, University of  
81 Lausanne, Lausanne, Switzerland
- 82 27: Centre for Biotechnology and Bioinformatics, University of Nairobi, Nairobi, Kenya
- 83 28: Department of Environmental and Natural Resources Management, University of Patras,  
84 Agrinio, Etoloakarnania, Greece
- 85 29: Department of Biology and Biotechnology, University of Pavia, Pavia, Italy
- 86 30: Schools of Medicine and Dentistry, University of Plymouth, Plymouth, United Kingdom
- 87 31: Department of Animal Systematics, Ústav zoológie SAV; Scientica, Ltd., Bratislava, Slovakia
- 88 32: McDonnell Genome Institute, Washington University School of Medicine, St. Louis, Missouri,  
89 United States
- 90 33: Department of Biological Sciences, Wayne State University, Detroit, Michigan, United States
- 91 34: Department of Biology, West Virginia University, Morgantown, West Virginia, United States
- 92 35: Department of Epidemiology of Microbial Diseases, Yale School of Public Health, New  
93 Haven, Connecticut, United States

94 36: Bond Life Sciences Center, University of Missouri, Columbia, Missouri, United States

95

96 **Abstract:**

97 **Background:**

98 Tsetse flies (*Glossina* sp.) are the sole vectors of human and animal trypanosomiasis  
99 throughout sub-Saharan Africa. Tsetse are distinguished from other Diptera by unique  
100 adaptations, including lactation and the birthing of live young (obligate viviparity), a vertebrate  
101 blood specific diet by both sexes and obligate bacterial symbiosis. This work describes  
102 comparative analysis of six *Glossina* genomes representing three sub-genera: *Morsitans* (*G.*  
103 *morsitans morsitans* (*G.m. morsitans*), *G. pallidipes*, *G. austeni*), *Palpalis* (*G. palpalis*, *G.*  
104 *fuscipes*) and *Fusca* (*G. brevipalpis*) which represent different habitats, host preferences and  
105 vectorial capacity.

106 **Results:**

107 Genomic analyses validate established evolutionary relationships and sub-genera. Syntenic  
108 analysis of *Glossina* relative to *Drosophila melanogaster* shows reduced structural conservation  
109 across the sex-linked X chromosome. Sex linked scaffolds show increased rates of female  
110 specific gene expression and lower evolutionary rates relative to autosome associated genes.  
111 Tsetse specific genes are enriched in protease, odorant binding and helicase activities.  
112 Lactation associated genes are conserved across all *Glossina* species while male seminal  
113 proteins are rapidly evolving. Olfactory and gustatory genes are reduced across the genus  
114 relative to other characterized insects. Vision associated Rhodopsin genes show conservation  
115 of motion detection/tracking functions and significant variance in the Rhodopsin detecting colors  
116 in the blue wavelength ranges.

117 **Conclusions:**

118 Expanded genomic discoveries reveal the genetics underlying *Glossina* biology and provide a  
119 rich body of knowledge for basic science and disease control. They also provide insight into the  
120 evolutionary biology underlying novel adaptations and are relevant to applied aspects of vector  
121 control such as trap design and discovery of novel pest and disease control strategies.

122 **Keywords:**

123 Tsetse, trypanosomiasis, hematophagy, lactation, disease, neglected, symbiosis

124

## 125 **Background:**

126 Flies in the genus *Glossina* (tsetse flies) are vectors of African trypanosomes, which are of great  
127 medical and economic importance in Africa. Sleeping sickness (Human African  
128 Trypanosomiasis or HAT) is caused by two distinct subspecies of the African trypanosomes  
129 transmitted by tsetse. In East and Southern Africa, *Trypanosoma brucei rhodesiense* causes the  
130 acute *Rhodesiense* form of the disease, while in Central and West Africa *T. b. gambiense*  
131 causes the chronic *Gambiense* form of the disease, which comprises about 95% of all reported  
132 HAT cases. Devastating epidemics in the 20<sup>th</sup> century resulted in hundreds of thousands of  
133 deaths in sub-Saharan Africa [1], but more effective diagnostics now indicate that data  
134 concerning sleeping sickness deaths are subject to gross errors due to under-reporting [2]. With  
135 hindsight, it is thus reasonable to infer that millions died from sleeping sickness during the  
136 colonial period. Loss of interest and funding for control programs within the endemic countries  
137 resulted in a steep rise in incidence after the post-independence period of the 1960s. In an  
138 ambitious campaign to control the transmission of Trypanosomiasis in Africa, multiple groups  
139 came together in a public/private partnership. These include the WHO, multiple non-  
140 governmental organizations, Sanofi Aventis and Bayer. The public sector groups developed and  
141 implemented multi-country control strategies and the companies donated the drugs required for  
142 treatment of the disease. The campaign reduced the global incidence of *Gambiense* HAT to  
143 <3,000 cases in 2015 [3]. Based on the success of the control campaign there are now plans to  
144 eliminate *Gambiense* HAT as a public health problem by 2030 [4]. In contrast, control of  
145 *Rhodesiense* HAT has been more complex as disease transmission involves domestic animals,  
146 which serve as reservoirs for the parasite. Hence elimination of the *Rhodesiense* disease will  
147 require treatment or elimination of domestic reservoirs, and/or reduction of tsetse vector  
148 populations. These strategies play a key part while medical interventions are used largely for  
149 humanitarian purposes. In addition to the public health impact of HAT, Animal African

150 Trypanosomiasis (AAT or Nagana) limits the availability of meat and milk products in large  
151 regions of Africa. It also excludes effective cattle rearing from ten million square kilometers of  
152 Africa [5] with wide implications for land use, i.e. constraints on mixed agriculture and lack of  
153 animal labor for ploughing [6]. Economic losses in cattle production are estimated at 1-1.2 billion  
154 dollars US and total agricultural losses caused by AAT are estimated at 4.75 billion dollars US  
155 per year [7, 8].

156 Achieving disease control in the mammalian host has been difficult given the lack of vaccines.  
157 This is due to the process of antigenic variation the parasite displays in its host. Hence,  
158 accurate diagnosis of the parasite and staging of the disease are important. This is of particular  
159 importance due to the high toxicity of current drugs available for treatment of late-stage disease  
160 although introduction of a simpler and shorter nifurtimox and eflornithine combination therapy  
161 (NECT)[9] and discovery of new oral drugs, such as fexinidazole [10] and acoziborole, are  
162 exciting developments. Although powerful molecular diagnostics have been developed in  
163 research settings, few have yet to reach the patients or national control programs [11]. Further  
164 complicating control efforts, trypanosomes are showing resistance to available drugs for  
165 treatment [12, 13]. While vector control is essential for zoonotic *Rhodesiense* HAT, it has not  
166 played a major role in *Gambiense* HAT as it was considered too expensive and difficult to  
167 deploy in the resource poor settings of HAT foci. However, modelling, historical investigations  
168 and practical interventions demonstrate the significant role that vector control can play in the  
169 control of *Gambiense* HAT [14-16], especially given the possibility of long-term carriage of  
170 trypanosomes in both human and animal reservoirs [17, 18]. The African Union has made  
171 removal of trypanosomiasis via tsetse fly control a key priority for the continent [19].

172 Within the *Glossinidae*, 33 extant taxa are described from 22 species in 4 subgenera. The first  
173 three sub-genera *Austenina* Townsend, *Nemorhina* Robineau-Desvoidy and *Glossina*  
174 *Wiedemann* correspond to the *Fusca*, *Palpalis*, and *Morsitans* species groups, respectively [20].



175 The fourth subgenus *Machadomia* was established in 1987 to incorporate *G. austeni*. The  
176 relationship of *G. austeni* Newstead with respect to the *Palpalis* and *Morsitans* complex flies  
177 remains controversial [21]. While molecular taxonomy shows that *Palpalis*- and *Morsitans*-  
178 species groups are monophyletic, the *Fusca* species group emerges as sister group to all  
179 remaining Glossinidae. *Morsitans* group taxa are adapted to drier habitats relative to the other  
180 two subgenera [22]. *Palpalis* group flies tend to occur in riverine and lacustrine habitats. *Fusca*  
181 group flies largely inhabit moist forests of West Africa. The host-specificity of the different  
182 species groups vary, with the *Palpalis* group flies displaying strong anthrophilicity while the  
183 others are more zoophilic in preference. The principal vectors of HAT include *G. palpalis* s.l., *G.*  
184 *fuscipes* and *G. m. morsitans* s.l. The riverine habitats of *Palpalis* group flies and their  
185 adaptability to peridomestic environments along with human blood meal preferences make them  
186 excellent vectors for HAT. Other species belonging to the *Morsitans* group (such as *G.*  
187 *pallidipes*) can also transmit human disease, but principally play an important role in AAT  
188 transmission. In particular, *G. pallidipes* has a wide distribution and a devastating effect in East  
189 Africa. Also, of interest is *G. brevipalpis*, an ancestral tsetse species within the *Fusca* species  
190 complex. This species exhibits poor vectorial capacity with *T. brucei* relative to *G. m. morsitans*  
191 in laboratory infection experiments using colonized fly lines [23]. Comparison of the susceptibility  
192 of *G. brevipalpis* to *Trypanosoma congolense* (a species that acts as a major causative agent of  
193 AAT) also showed it has a much lower rate of infection relative to *Glossina austeni* [24].

194 To expand the genetic/genomic knowledge and develop new and/or improved vector control  
195 tools a consortium, the International Glossina Genome Initiative (IGGI), was established in early  
196 2004 to sequence the *G. m. morsitans* genome [25]. In 2014 the first tsetse fly genome from the  
197 *Glossina m. morsitans* species was produced [26]. This project facilitated the use of modern  
198 techniques such as transcriptomics and enabled functional investigations at the genomic level  
199 into tsetse's viviparous reproductive physiology, obligate symbiosis, trypanosome transmission

200 biology, olfactory physiology and the role of saliva in parasite transmission. The species  
201 *Glossina m. morsitans* was chosen for the first genome discovery effort as it is relatively easy to  
202 maintain under laboratory conditions and many physiological studies had been based on this  
203 species. To study the genetics underlying tsetse species-specific traits, such as host preference  
204 and vector competence, we have now assembled five additional representative genomes from  
205 the species complexes of *Glossina*: *Morsitans* (*G. m. morsitans*, *G. pallidipes*),  
206 *Morsitans/Machadomia* (*G. austeni*), *Palpalis* (*G. palpalis*, *G. fuscipes*) and *Fusca* (*G.*  
207 *brevipalpis*). These species represent flies with differences in geographical localization,  
208 ecological preferences, host specificity and vectorial capacity (Summarized in Figure 1). Here  
209 we report on the evolution and genetics underlying this genus by comparison of their genomic  
210 architecture and predicted protein-coding sequences and highlight some of the genetic  
211 differences that hold clues to the differing biology between these species.

## 212 **Results and Discussion:**

### 213 **Multiple genetic comparisons confirm *Glossina* phylogenetic relationships and the** 214 **inclusion of *G. austeni* as a member of the *Morsitans* sub-Genus**

215 Sequence similarity between the genomes was analyzed using whole genome nucleotide  
216 alignments of supercontigs and predicted coding sequences from the five new *Glossina*  
217 genomes as well as those from the *Musca domestica* genome using *G. m. morsitans* as a  
218 reference (Figure 2A). The results indicate that *G. pallidipes* and *G. austeni* are most similar at  
219 the sequence level to *G. m. morsitans*. This is followed by the species in the *Palpalis* sub-genus  
220 (*G. fuscipes* and *G. palpalis*). The remaining species (*G. brevipalpis*) shows the least sequence  
221 conservation relative to *G. m. morsitans* followed by the outgroup species *M. domestica*. The  
222 lower sequence similarity between *G. brevipalpis* and the other tsetse species reinforces its  
223 status as a distant relative to the *Morsitans* and *Palpalis* sub-genera.

224 Alignment of the predicted coding sequences produced a similar result to that observed in the  
225 whole genome alignment in terms of similarity to *G. m. morsitans* (Figure 2A). Of interest is that  
226 more than 25% of the *G. m. morsitans* exon sequences were not align-able with *G. brevipalpis*,  
227 indicating that they were either lost, have diverged beyond alignability or were in an  
228 unsequenced region in *G. brevipalpis*. In addition, *G. brevipalpis* has on average ~5000 fewer  
229 predicted protein-coding genes than the other species. Given the low GC content of the *G.*  
230 *brevipalpis* sequenced genome it is possible that some of the regions containing these  
231 sequences lie within heterochromatin. The difficulties associated with sequencing  
232 heterochromatic regions may have excluded these regions from our analysis; however, it also  
233 implies that if these protein coding genes are indeed present they are located in a region of the  
234 genome with low transcriptional activity.

235 We inferred the phylogeny and divergence times of *Glossina* using a concatenated alignment of  
236 286 single-copy gene orthologs (478,000 nucleotide positions) universal to *Glossina* (Figure  
237 2B). The tree recovered from this analysis has support from both Maximum Likelihood and  
238 Bayesian analyses, using respectively homogeneous and heterogeneous models of  
239 replacement. A coalescent-aware analysis further returned full support, indicating a speciation  
240 process characterized by clear lineage sorting (Supplemental Figure 1). These results suggest  
241 an allopatric speciation process characterized by a small founder population size followed by  
242 little to no introgression among newly formed species.

243 Furthermore, we assembled complete mitochondrial (mtDNA) genome sequences for each  
244 species as well as *Glossina morsitans centralis* as references for use in distinguishing samples  
245 at the species, sub-species or haplotype levels. All the mtDNA genomes encode large (16S  
246 rRNA) and small (12S rRNA) rRNAs, 22 tRNAs and 13 protein-coding genes. Phylogenetic  
247 analysis of the resulting sequences using the Maximum Likelihood method resulted in a tree  
248 with congruent topology to that produced by analysis of the concatenated nuclear gene

249 alignment (Figure 2C). A comparative analysis of the mtDNA sequences identified variable  
250 marker regions with which to identify different tsetse species via traditional sequencing and/or  
251 high-resolution melt analysis (HRM) (Supplemental Figure 2). Analysis of the amplicons from  
252 this region using HRM facilitated the discrimination of these products based on their  
253 composition, length and GC content. Use of HRM on these variable regions successfully  
254 resolved differences between test samples consisting of different tsetse species as well as  
255 individuals with different haplotypes or from different populations (Supplemental Figure 3). This  
256 method provides a rapid, cost effective and relatively low-tech way of identifying differences in  
257 field caught tsetse for the purposes of population genetics and measurement of population  
258 diversity.

259 The trees derived from the nuclear and mitochondrial phylogenetic analyses agree with  
260 previously published phylogenies for tsetse [27-29] and the species delineate into groups  
261 representing the defined *Fusca*, *Palpalis* and *Morsitans* sub-genera.

262 A contentious issue within the taxonomy of *Glossina* is the placement of *G. austeni* within the  
263 *Machadomia* sub-Genus. Comparative anatomical analysis of male genitalia places *G. austeni*  
264 within the *morsitans* sub-Genus. However, female *G. austeni* genitalia bear anatomical  
265 similarities to members of the *Fusca* sub-genus. In addition, *G. austeni*'s habitat preferences  
266 and some external morphology resemble those of the *palpalis* sub-Genus [28]. Recent  
267 molecular evidence suggests that *G. austeni* are closer to the *morsitans* sub-genus [27, 29].

268 The data generated via the three discrete analyses described above all support the hypothesis  
269 that *G. austeni* is a member of the *Morsitans* sub-genus rather than the *Palpalis* sub-genus and  
270 belongs as a member of the *Morsitans* group rather than its own discrete sub-Genus.

271 **Comparative analysis of *Glossina* with *Drosophila* reveals reduced synteny and female**  
272 **specific gene expression on X-linked scaffolds**

273 The scaffolds in each *Glossina spp.* genome assembly were assigned to chromosomal arms  
274 based on orthology and relative position to protein-coding sequences in the *D. melanogaster*  
275 genome (*Drosophila*) [30]. The *Glossina* and *Drosophila* genomes contain six chromosome  
276 arms (Muller elements A-F) [31-33]. We assigned between 31-52% of annotated genes in each  
277 species to a Muller element, which we used to assign >96% of scaffolds to Muller elements in  
278 each species (Figure 3 and Supplemental table 1). From these results, we inferred the relative  
279 size of each Muller element in each species by counting the number of annotated genes  
280 assigned to each element and calculating the cumulative length of all assembled scaffolds  
281 assigned to each element. Using either measure, we find that element E is the largest and  
282 element F is the shortest in all species, consistent with observations in *Drosophila* [34].

283 Mapping of the *Glossina* scaffolds to the *Drosophila* Muller elements reveals differing levels of  
284 conservation of synteny (homologous genomic regions with maintained orders and orientations)  
285 across these six-species relative to *Drosophila*. In *G. m. morsitans*, the X chromosome is  
286 composed of Muller elements A, D, and F as opposed to the *Drosophila* X which only contains A  
287 and sometimes D [33], and all other *Glossina* species besides *G. brevipalpis* have the same  
288 karyotype [35]. We therefore assume that the same elements are X-linked in the other *Glossina*  
289 species (apart from *G. brevipalpis*). This analysis reveals that scaffolds mapping to *Drosophila*  
290 Muller element A show a reduced overall level of syntenic conservation relative to the other  
291 Muller elements while the scaffolds mapping to *Drosophila* Muller element D (part of the  
292 *Glossina* X chromosome, but not the *D. melanogaster* X) retain more regions of synteny  
293 conservation. We hypothesize that the lower syntenic conservation on element A reflects a  
294 higher rate of rearrangement because it has been X-linked for more time (both in the *Drosophila*  
295 and *Glossina* lineages) than element D (only in *Glossina*) and rearrangement rates are higher  
296 on the X chromosome (element A) in *Drosophila* [34]

297 To examine the relationship between gene expression and DNA sequence evolution, we  
298 compared gene expression levels between the X chromosome and autosomes using sex  
299 specific RNA-seq libraries derived from whole males, whole non-lactating females and whole  
300 lactating females for all the *Glossina* species apart from *G. pallidipes*. Consistent with previous  
301 results from *G. m. morsitans* [33], the ratio of female:male expression is greater on the X  
302 chromosome than autosomes across species (Supplemental Figure 4). In addition, there is a  
303 deficiency of genes with male-biased expression (up-regulated in males relative to females) on  
304 the X-linked elements in all species (Supplemental Figure 5). Reduced levels of male-biased  
305 gene expression have also been observed in mosquitoes and is a conserved feature of the  
306 *Anopheles* genus [36]. The X chromosome is hemizygous in males, which exposes recessive  
307 mutations to natural selection and can accelerate the rate of adaptive substitutions and facilitate  
308 the purging of deleterious mutations on the X chromosome [37, 38]. Using dN/dS values for  
309 annotated genes, we fail to find any evidence for this faster-X effect across the entire phylogeny  
310 or along any individual lineages (Supplemental Figure 6). The faster-X effect is expected to be  
311 greatest for genes with male-biased expression because they are under selection in males [37],  
312 but we find no evidence for faster-X evolution of male-biased genes in any of the *Glossina*  
313 species. In contrast, there is some evidence for “slower-X” evolution amongst female-biased  
314 genes (Supplemental Figure 7), suggesting that purifying selection is more effective at purging  
315 deleterious mutations on the X chromosome [39]. Genes with female-biased expression tend to  
316 be broadly expressed [40], suggesting that pleiotropic constraints on female-biased genes  
317 increase the magnitude of purifying selection and produce the observed slower-X effect [41].  
318 The exception to these observations is element F. Element F, the smallest X-linked element,  
319 has low female expression and an excess of genes with male-biased expression (Supplemental  
320 Figure 8). In contrast with the other X-linked Muller elements in *Glossina*, the dN/dS ratios of all  
321 Element F associated genes (male biased and unbiased) suggest that they are evolving faster

322 than the rest of the genome across all tsetse lineages (Supplemental Figure 9). The F elements  
323 in *Drosophila* species, while not being X-linked, show similar properties in that they have lower  
324 levels of synteny, increased rates of inversion, and higher rates of protein coding sequence  
325 evolution, suggesting that the F element is rapidly evolving in flies within Schizophora [42].

#### 326 **The *G. austeni* genome contains *Wolbachia* derived chromosomal insertions (Figure 4)**

327 A notable feature of the *G. m. morsitans* genome was the integration of large segments of the  
328 *Wolbachia* symbiont genome via horizontal gene transfer (HGT). Characterization of the *G. m.*  
329 *morsitans* HGT events revealed that the chromosomal sequences with transferred material  
330 contained a high degree of nucleotide polymorphisms, coupled with insertions, and deletions  
331 [43]. These observations were used in this analysis to distinguish cytoplasmic from  
332 chromosomal *Wolbachia* sequences during the *in-silico* characterization of the tsetse genomes.  
333 Analysis of the six assemblies revealed that all contain *Wolbachia* sequences although *G.*  
334 *pallidipes*, *G. fuscipes*, *G. palpalis* and *G. brevipalpis* had very limited DNA sequence that  
335 displayed homology with *Wolbachia*. Furthermore, analysis of fly lines from which the  
336 sequenced DNA was obtained with *Wolbachia* specific primers PCR-amplification was negative.  
337 This is in line with PCR-based screening of *Wolbachia* infections in natural populations, further  
338 indicating that these short segments could be artifacts or contaminants [44]. However, *G.*  
339 *austeni* contains more extensive chromosomal integrations of *Wolbachia* DNA (Supplemental  
340 Table 2).

341 All *Wolbachia* sequences, chromosomal and cytoplasmic, identified in *G. austeni* were mapped  
342 against the reference genomes of *Wolbachia* strains *wMel*, *wGmm*, and the chromosomal  
343 insertions A & B in *G. m. morsitans* (Figure 4). The *G. austeni* chromosomal insertions, range in  
344 size from 500 - 95,673 bps with at least 812 DNA fragments identified *in silico*. Sequence  
345 homology between *wMel*, *wGmm*, and the chromosomal insertions A and B in *G. m. morsitans*  
346 *morsitans* varied between 98 – 63%, with the highest sequence homologies observed with

347 chromosomal insertions A and B from *G. m. morsitans*. The similarity between the genomic  
348 insertions in *G. m. morsitans* and *G. austeni* relative to cytoplasmic *Wolbachia* sequences  
349 suggests they could be derived from an event in a common ancestor. The absence of  
350 comparable insertions in *G. pallidipes* (a closer relative to *G. m. morsitans*) indicate that either  
351 these insertions occurred independently or that the region containing the insertions was not  
352 assembled in *G. pallidipes*. Additional data from field based *Glossina* species/sub-species is  
353 required to determine the true origin of these events.

354 **Analysis of *Glossina* genus and sub-genus specific gene families reveals functional**  
355 **enrichments.**

356 All annotated *Glossina* genes were assigned to groups (orthology groups - OGs) containing  
357 predicted orthologs from other insect and arthropod species represented within Vectorbase. A  
358 global analysis of all the groups containing *Glossina* genes was utilized to determine the gene  
359 composition of these flies relative to their Dipteran relatives and between the *Glossina* sub-  
360 genera. An array of twelve Diptera are represented within this analysis including *Anopheles*  
361 *gambiae* (Nematocera), *Aedes aegypti* (Nematocera), *Lutzomyia longipalpis* (Nematocera),  
362 *Drosophila melanogaster* (Brachycera), *Stomoxys calcitrans* (Brachycera) and *Musca*  
363 *domestica* (Brachycera).

364 The tsetse associated OGs are represented by groups ranging from universal to the Diptera  
365 included in the analysis to species specific to the individual tsetse species. The composition of  
366 these OGs breaks down to a core of 3,058 OGs with constituents universal to Diptera (93430  
367 genes), 299 OGs specific and universal to Brachyceran flies (4975 genes) and 162 OGs specific  
368 and universal to *Glossina* (1548 genes). A dramatic feature identified by this analysis is the  
369 presence of 2,223 OGs specific and universal to the *Palpalis* sub-genus (*G. fuscipes* and *G.*  
370 *palpalis* 4948 genes). This contrasts with the members of the *Morsitans* sub-genus (*G. m.*



371 *morsitans*, *G. pallidipes* and *G. austeni*) in which there are 137 specific and universal OGs (153  
372 genes) (Figure 5, Supplemental table 3, Supplemental data 2+3).

373 To understand the functional significance of the *Glossina* specific OGs, we performed an  
374 analysis of functional enrichment of gene ontology (GO) terms within these groups. Many of the  
375 *Glossina* specific genes are not currently associated with GO annotations as they lack  
376 characterized homologs in other species. As such these sequences were not included in this  
377 analysis. However, ~60% of the genes within the combined *Glossina* gene repertoire are  
378 associated with GO annotations, which allowed for analysis of a sizable proportion of the  
379 dataset.

380 ***Glossina* genus universal and specific genes are enriched in genes coding for proteases**  
381 **and odorant binding proteins.**

382 The orthology groups containing genes specific and universal to the *Glossina* genus are  
383 enriched in odorant binding and serine-type endopeptidase activities. The universality of these  
384 genes within *Glossina* and their absence from the other surveyed Dipteran species suggests  
385 they are currently associated with tsetse specific adaptations.

386 The ontology category with the lowest p-value represents proteolysis associated genes. This  
387 category encompasses 92 *Glossina* specific proteases with predicted serine-type  
388 endopeptidase activity. The abundance of this category may be an adaptation to the protein-rich  
389 blood specific diet of both male and female flies. A similar expansion of serine proteases is  
390 associated with blood feeding in mosquitoes and the presence of an equivalent expansion in  
391 tsetse may represent an example of convergent evolution [45]. This class of peptidases is also  
392 associated with critical functions in immunity, development and reproduction in Diptera [46-49].

393 The other enriched GO term common to all *Glossina* is for genes encoding odorant binding  
394 proteins (OBPs). Of the 370 OBPs annotated within *Glossina*, 55 lack orthologs in species

395 outside of *Glossina*. The primary function of OBPs is to bind small hydrophobic molecules to  
396 assist in their mobilization in an aqueous environment. These proteins are primarily associated  
397 with olfaction functions as many are specifically expressed in chemosensory associated  
398 tissues/organs where they bind small hydrophobic molecules and transport them to odorant  
399 receptors [50, 51]. However, functional analyses in *G. m. morsitans* have associated an OBP  
400 (OBP6) with developmental activation of hematopoiesis during larvigenesis in response to the  
401 mutualistic *Wigglesworthia* symbiont [52]. In addition, many of the OBPs identified in this  
402 analysis are characterized as *Glossina* specific seminal proteins with male accessory gland  
403 specific expression patterns. They are primary constituents of the spermatophore structure  
404 produced by the male tsetse during mating [53]. The genus specific nature of these OBPs  
405 suggests that they are key components of reproductive adaptations of male tsetse.

406 **The *Palpalis* sub-genus contains a large group of sub-genus specific genes.**

407 A large group of genes specific and universal to members of the *Palpalis* sub-genus (*G. palpalis*  
408 and *G. fuscipes*) was a defining feature of the orthology analysis. The expansion includes 2223  
409 OGs and encompasses 4948 genes between *G. palpalis* and *G. fuscipes*. Homology based  
410 analysis of these genes by comparison against the NCBI NR database revealed significant (e-  
411 value <  $1 \times 10^{-10}$ ) results for 603 of the genes. Within this subset of genes, ~ 5% represent  
412 bacterial contamination from tsetse's obligate endosymbiont *Wigglesworthia*. Sequences  
413 homologous to another well-known bacterial symbiont *Spiroplasma* were found exclusively in *G.*  
414 *fuscipes*. This agrees with previous observations of *Spiroplasma* infection of colonized and field  
415 collected *G. fuscipes* flies [54].

416 Four genes bear homology to viral sequences (*GPPI051037/GFUI045295* and  
417 *GPPI016422/GFUI028200*). These sequences are homologous to genes from Ichnoviruses.  
418 These symbiotic viruses are transmitted by parasitic Ichneumonid wasps with their eggs to

419 suppress the immune system of host insects [55]. These genes may have originated from a  
420 horizontal transfer event during an attempted parasitization.

421 Another feature of note is the abundance of putative proteins with predicted helicase activity. Of  
422 the 603 genes with significant hits, 64 (10.5%) are homologous to characterized helicases.  
423 Functional enrichment analysis confirms the enrichment of helicase activity in this gene set.  
424 These proteins are associated with the production of small RNA's (miRNAs, siRNAs and  
425 piRNAs) which mediate posttranscriptional gene expression and the defensive response against  
426 viruses and transposable elements. Of the 64 genes, 41 were homologous to the armitage  
427 (*armi*) helicase. Recent work in *Drosophila* shows that *armi* is a reproductive tissue specific  
428 protein and is responsible for binding and targeting mRNAs for processing into piRNAs by the  
429 PIWI complex [56]. The reason for the accumulation of this class of genes within the *Palpalis*  
430 sub-genus is unknown. However, given the association of these proteins with small RNA  
431 production they could be associated with a defensive response against viral challenges or  
432 overactive transposable elements. A similar phenomena is seen in *Aedes aegypti* where  
433 components of the PIWI pathway have been amplified and function outside of the reproductive  
434 tissues to generate piRNAs against viral genes [57].

435 **Analysis of gene family variations reveals sub-genus specific expansions and**  
436 **contractions of genes involved in sperm production and chemosensation**

437 In addition to unique gene families, we identified orthology groups showing significant variation  
438 in gene numbers between *Glossina* species. Of interest are groups showing significant sub-  
439 genus specific expansions or contractions, which may represent lineage specific adaptations.  
440 General trends that we observed in these groups show the largest number of gene family  
441 expansions within the *Palpalis* sub-genus and the largest number of gene family contractions  
442 within *G. brevipalpis* (a member of the *Fusca* sub-genus) (Figure 6 - For completely annotated  
443 figures with descriptions and group IDs see Supplemental Figures 11 and 12, respectively).

444 *Palpalis* sub-genus specific expansion of sperm associated genes (Supplemental data 4)

445 Members of the *Palpalis* sub-genus had a total of 29 gene family expansions and 1 contraction  
446 relative to the other 4 tsetse species. Of the three sub-Genera, this represents the largest  
447 number of expansions and parallels with the large number of *Palpalis* specific orthology groups.  
448 Two gene families expanded within the *Palpalis* group (VBGT00770000031191 and  
449 VBGT00190000014373) encode WD repeat containing proteins. The *Drosophila* orthologs  
450 contained within these families (*cg13930*, *dic61B*, *cg9313*, *cg34124*) are testes specific and  
451 associated with cilia/flagellar biosynthesis and sperm production [58]. Alteration/diversification of  
452 sperm associated proteins could explain the split of the *Palpalis* sub-genus from the other  
453 *Glossina* and the potential incipient speciation documented between *G. palpalis* and *G. fuscipes*  
454 [59].

455 *The Morsitans sub-genera shows reductions in chemosensory protein genes*

456 Within the *Morsitans* sub-genus six gene families are expanded and two are contracted relative  
457 to the other tsetse species. Of interest, one of the contracted gene families encodes  
458 chemosensory proteins (VBGT00190000010664) orthologous to the CheB and CheA series of  
459 proteins in *D. melanogaster*. The genes encoding these proteins are expressed exclusively in  
460 the gustatory sensilla of the forelegs of male flies and are associated with the detection of low  
461 volatility pheromones secreted by the female in higher flies [60]. Of interest is that the number of  
462 genes in *G. palpalis* (14), *G. fuscipes* (15) and *G. brevipalpis* (14) are expanded within this  
463 family relative to *D. melanogaster* (12), *M. domestica* (10) and *S. calcitrans* (4). However, the  
464 *Morsitans* group flies *G. m. morsitans* (7), *G. pallidipes* (7) and *G. austeni* (5) all appear to have  
465 lost some members of this family. The functional significance of these changes is unknown.  
466 However, it could represent an optimization of the male chemosensory repertoire within the  
467 *Morsitans* sub-genus.

468 In terms of expanded gene families in *Morsitans*, we find two encoding enzymes associated with  
469 the terpenoid backbone biosynthesis pathway (VBGT00190000010926 -farnesyl pyrophosphate  
470 synthase and VBGT00840000047886 – farnesol dehydrogenase). This pathway is essential for  
471 the generation of precursors required for the synthesis of the insect hormone Juvenile Hormone  
472 (JH). In adult *G. m. morsitans*, JH levels play an important role in regulating nutrient balance  
473 before and during pregnancy. High JH titers activate lipid biosynthesis and accumulation in the  
474 fat body prior to lactation. During lactation, JH titers fall, resulting in the catabolism and  
475 mobilization of stored lipids for use in milk production [61].

476 **Comparative analysis of the immune associated genes in *Glossina* species reveals**  
477 **specific expansions, contractions and losses relative to *Musca domestica* and**  
478 ***Drosophila melanogaster***

479 Tsetse flies are exposed to bacterial, viral, protozoan and fungal microorganisms exhibiting a  
480 broad spectrum of beneficial, commensal, parasitic and pathogenic phenotypes within their  
481 host. Yet, the diversity and intensity of the microbial challenge facing tsetse flies is limited  
482 relative to that of related Brachyceran flies such as *D. melanogaster* and *M. domestica* in terms  
483 of level of exposure, microbial diversity and host microbe relationships. While tsetse larvae live  
484 in a protected environment (maternal uterus) feeding on maternally produced lactation  
485 secretions, larval *D. melanogaster* and *M. domestica* spend their entire immature development  
486 in rotting organic materials surrounded by and feeding on a diverse array of microbes. The adult  
487 stages also differ in that tsetse feed exclusively on blood which exposes them to a distinct yet  
488 limited array of microbial fauna. The immune function and genetic complement of *D.*  
489 *melanogaster* is well characterized and provides the opportunity to compare the constitution of  
490 orthologous immune gene sequences between *M. domestica* and the *Glossina* species [62].  
491 Orthology groups containing *Drosophila* genes associated with the ‘Immune System Process’

492 GO tag (GO:0002376) were selected and analyzed to measure the presence/absence or  
493 variance in number of orthologous sequences in *Glossina* (Figure 7 + Supplemental Table 5).  
494 Several orthologs within this ontology group are highly conserved across all species and are  
495 confirmed participants with the fly's antimicrobial immune response. These genes include the  
496 peptidoglycan recognition proteins (PGRPs) (with the exception of the PGRP SC1+2 genes)  
497 [63], prophenoloxidase 1, 2 and 3 [52], the reactive oxygen intermediates *dual oxidase* and  
498 *peroxiredoxin 5* [64, 65], and antiviral (RNAi pathway associated) *dicer 2* and *argonaute 2*. The  
499 antimicrobial peptide encoding genes *attacin* (variants A and B) and *cecropin* (variants A1, A2,  
500 B and C) are found within *Glossina*, but have diverged significantly (the highest % identity based  
501 on blastx comparison = 84%) from closely related fly taxa [66-68].

502 *Glossina* species are missing immune gene families present in *D. melanogaster* and *M.*  
503 *domestica*

504 Several gene families are missing within the *Glossina* species although expanded within *M.*  
505 *domestica* (Figure 7). These include *lysozyme E*, *defensin*, *elevated during infection*, and the  
506 *PGRP-SC1+2* gene families. These may be adaptations to the microbe rich diet and  
507 environment in which *M. domestica* larvae and adults exist. The expansion of immune gene  
508 families in *M. domestica* relative to *D. melanogaster* was previously documented in the  
509 publication of the *M. domestica* genome [69]. However, the added context of the *Glossina*  
510 immune gene complement highlights the significance of the expansion of these families relative  
511 to their loss in all *Glossina* species. The loss of these families may represent the reduced  
512 dietary and environmental exposure to microbial challenge associated with the dramatic  
513 differences in life history between these flies.

514 *Glossina* species show immune gene family expansions associated with the Toll and IMD  
515 pathways

516 In contrast, we observed several *Glossina* immune related gene families which are expanded  
517 relative to orthologous families in *Drosophila* and *M. domestica* (Figure 7). Duplications of this  
518 nature often reflect evolutionarily important aspects of an organism's biology, and in the case of  
519 tsetse, may have resulted from the fly's unique association with parasitic African trypanosomes.  
520 Prominent among the expanded immune related *Glossina* genes are those that encode *Attacin*  
521 *A* and *Attacin B*, which are IMD pathway produced effector antimicrobial molecules, and *Cactus*,  
522 a component of the Toll signaling pathway. Similarly, the most highly expanded immune related  
523 gene across *Glossina* species are the orthologs of *Drosophila* CG4325. RNAi-based studies in  
524 *Drosophila* indicate that CG4325 is a regulator of both the Toll and IMD signaling pathways [70].  
525 Significant expansion of this gene family in *Glossina* substantiates previously acquired data that  
526 demonstrated the functional importance of the Toll and IMD pathways in tsetse's response to  
527 trypanosome challenge [71, 72]. Finally, all six *Glossina* genomes encode multiple copies of  
528 *moira*. This gene, which is involved in cell proliferation processes [73], is differentially expressed  
529 upon trypanosome infection when compared to uninfected *G. m. morsitans* [74]. In an effort to  
530 eliminate parasite infections, tsetse flies produce reactive oxygen intermediates that cause  
531 collateral cytotoxic damage [64]. Additionally, trypanosome infection of tsetse's salivary glands  
532 induces expression of fly genes that encode proteins associated with stress and cell division  
533 processes, further indicating that parasite infection results in extensive damage to host cells.  
534 Expansion of *moira* gene copy number in *Glossina*'s genome may reflect the fly's need to  
535 maintain epithelial homeostasis in the face of damage caused by trypanosome infections.

536 *G. brevipalpis* has a species-specific expansion of immune associated proteins

537 An interesting highlight from this analysis is the identification of a gene expansion associated  
538 with alpha-mannosidase activity (VBGT00190000009892). An orthologous *Drosophila* gene ( $\alpha$ -  
539 *Man-1a*) is an essential component in the encapsulation response by hemocytes to attack by  
540 parasitoid wasps. This enzyme modifies lamellocyte surface glycoproteins to facilitate the

541 recognition and encapsulation of foreign bodies. As described in the *G. m. morsitans* genome  
542 paper and here, there is evidence of parasitization by parasitoid wasps in the genomes of these  
543 flies in the form of integrated gene sequences homologous to polynavirus genes [26]. The  
544 expansion of these proteins could be an evolutionary response to pressure induced by  
545 parasitization although the current status of tsetse associated parasitoids is unknown.

#### 546 **Tsetse reproductive genetics**

547 *Milk protein genes are universal and tightly conserved in Glossina (Figure 8 + Supplemental*  
548 *table 6)*

549 The intrauterine development and nourishment of individual larval offspring is a defining  
550 characteristic of the *Hippoboscoidea* superfamily, which includes the *Glossinidae* (Tsetse flies),  
551 *Hippoboscidae* (Ked flies), *Nycteribiidae* (Bat flies), and *Streblidae* (Bat flies) families [75].  
552 Nutrient provisioning is accomplished by the secretion of a milk-like substance from specialized  
553 glands into the uterus where the larval flies consume the milk. Dry weight of tsetse milk is  
554 roughly 50% protein and 50% lipids [76]. A compiled list of the milk protein orthologs from the  
555 six species of tsetse have been assembled (Supplemental Table 6).

556 Milk protein genes 2-10 (*mgp2-10*) in *G. m. morsitans* are the largest milk protein gene family.  
557 These genes are tsetse specific, lack conserved functional protein domains and their origin is  
558 currently unknown. However, experimental evidence suggests they act as lipid emulsification  
559 agents and possible phosphate carrier molecules in the milk [77]. Search for orthologous  
560 sequences to these genes revealed 1:1 orthologs to each of the 9 genes in the 5 new *Glossina*  
561 species except for *G. brevipalpis* which lacks an orthologous sequence for the *mgp2* gene.  
562 These genes are conserved at the levels of both synteny and sequence (Figure 8A+B).  
563 Comparative expression analysis of these genes (and the other characterized milk protein  
564 orthologs: *milk gland protein 1*, *acid sphingomyelinase* and *transferrin* [78, 79]) in male, non-  
565 lactating and lactating females shows sex and lactation specific expression profiles across the



566 five species for which sex-specific RNA-seq data was available (Figure 8C+D). Comparison of  
567 sequence variation across species for these genes by dN/dS analysis indicates that they are  
568 under heavy negative selective pressure (Figure 8D). Enrichment analysis based on  
569 comparison of lactation-based RNA-seq data confirms that these 12 orthologous sequences are  
570 enriched in lactating flies across all *Glossina* (Figure 8E). The *mgp2-10* gene family is a unique  
571 and conserved adaptation that appears essential to the evolution of lactation in the *Glossina*  
572 genus. Determination of the origins of this protein family requires genomic analyses of other  
573 members of the Hippoboscoidea superfamily that exhibit viviparity along with other species  
574 closely related to this group.

575 *Tsetse seminal protein genes are rapidly evolving and vary in number and sequence*  
576 *conservation between species (Figure 9)*

577 Recent proteomic analysis of male seminal proteins in *G. m. morsitans* revealed an array of  
578 proteins transferred from the male to the female as components of the spermatophore [80].  
579 Cross referencing of the proteomic data with tissue specific transcriptomic analyses of the  
580 testes and male accessory glands (MAGs) allowed us to identify the tissues from which these  
581 proteins are derived. Many of the MAG associated proteins are *Glossina*-specific and are  
582 derived from gene families with multiple paralogs. These sequences were used to identify and  
583 annotate orthologous sequences in the other five *Glossina* species. In contrast to the milk  
584 proteins, sequence variance and differences in paralog numbers varies in male reproductive  
585 genes between the six *Glossina* species.

586 This is particularly evident in the genes with MAG biased/specific expression. MAG  
587 biased/specific genes are represented by 22 highly expressed gene families encoding  
588 characterized seminal fluid proteins (SFP). We investigated the evolutionary rate of reproductive  
589 genes over-expressed in the MAGs and testes, relative to a set of 5,513 *G. m. morsitans* genes,  
590 orthologous between the six species (Figure 9A). The average dN/dS ratio is higher in MAG

591 biased genes than in testes biased genes or the entire *Glossina* ortholog gene set suggesting  
592 that the MAG genes are under relaxed selective constraints. In addition, we found high  
593 heterogeneity in the selective pressure across MAG genes. This is specifically evident in the  
594 tsetse specific genes *GMOY002399*, *GMOY007759*, *GMOY004505* and *GMOY005874* (a  
595 protein with OBP like conserved cysteine residues) as well as the OBP ortholog *GMOY007314*.  
596 All five genes encode seminal fluid proteins as confirmed by the proteomic analysis of the  
597 spermatophore [80].

598 In addition to sequence variability the number of paralogs per species differs as well (Figure  
599 9B). This is similar to comparative analysis observations in *Anopheles* and *Drosophila* species  
600 [81, 82]. This variance is especially evident in *Glossina* specific protein families (i.e.  
601 *GMOY002399*, *GMOY004505/4506*, *GMOY005771*). In particular, there are a large number of  
602 gene orthologs/paralogs to the *GMOY005771* gene across all *Glossina* species revealing a  
603 large family of MAG genes of unknown function. The number of orthologs/paralogs differs  
604 significantly between *Glossina* species. In addition, the two *G. m. morsitans* paralogs  
605 *GMOY004724* and *GMOY004725* (predicted peptidase regulators), appear to display a higher  
606 number of putative gene duplications in the *Morsitans* sub-genus relative to the *Palpalis* and  
607 *Fusca* sub-Genera. Conservation appears instead to be more evident across testes genes that  
608 code for proteins associated with conserved structural and functional components of sperm.  
609 Overall, comparison of the MAG biased genes across *Glossina* reveals that this group shows  
610 substantial variability in terms of genomic composition and rate of evolution. This is in  
611 agreement with other studies indicating that male accessory proteins evolve at high rates due to  
612 intraspecific competition between males or sexually antagonistic coevolution between males  
613 and females [83].

614 **Olfactory associated protein-coding genes are conserved and reduced in number relative**  
615 **to other Diptera.**

616 Comparative analyses of genes responsible for perireceptor olfaction activities revealed high  
617 conservation of the repertoire among the six species. The genes appear to scatter across their  
618 respective genomes with only a few duplicates occurring in clusters [84]. *Glossina* species  
619 expanded loci that include Gr21a (responsible for CO<sub>2</sub> detection) [85], Or67d (mediates *cis*-  
620 vaccenyl acetate reception) and Obp83a, (thought to be olfactory specific) [86]. The expanded  
621 loci suggest involvement of gene duplication and/or transposition in their emergence [84]. All six  
622 species lack sugar receptors likely as a result of tsetse's streamlined blood-feeding behavior.  
623 Although our analysis did not reveal major discrepancies among the species, *G. brevipalpis* has  
624 lost three key gustatory receptors (Gr58c, Gr66a and Gr32a) compared to other species. In  
625 addition, *G. brevipalpis* showed higher structural gene rearrangements that could be attributed  
626 to its evolutionary distance relative to the other tsetse species [87].

#### 627 **A salivary protein gene shows sub-genus specific repeat motifs (Figure 10)**

628 Efficient acquisition of a blood meal by tsetse relies on a broad repertoire of physiologically  
629 active saliva components inoculated at the bite site. These proteins modulate early host  
630 responses, which, in addition to facilitating blood feeding can also influence the efficacy of  
631 parasite transmission [88, 89]. The differences in the competence of different tsetse fly species  
632 to develop mature *T. brucei* salivary gland infections may also be correlated with species-  
633 specific variations in saliva proteins. Tsetse saliva raises a species-specific IgG response in  
634 their mammalian hosts [90]. This response could potentially function as a biomarker to monitor  
635 exposure of host populations to tsetse flies [91].

636 The *sgp3* gene [92] is characterized in all the tsetse species by two regions: a  
637 metallophosphoesterase/5' nucleotidase and a repetitive glutamate/aspartate/asparagine-rich  
638 region (Figure 10A). The complete sequence for this gene from *G. brevipalpis* could not be  
639 obtained due to a gap in the sequence. The metallophosphoesterase/5' nucleotidase region is  
640 highly conserved between all tsetse species. However, the sequences contain sub-genus

641 specific (*Morsitans* and *Palpalis*) repeat motifs within the glutamate/aspartate/asparagine  
642 region. The motifs differ in size (32 amino acids in the *Morsitans* group and 57 amino acids in  
643 the *Palpalis* group) and amino acid composition (Figure 10B). Moreover, within each sub-genus,  
644 there are differences in the number of repetitive motifs. Within the *Morsitans* group, *G. m.*  
645 *morsitans* and *G. pallidipes* have five motifs while *G. austeni* has only four. In the *Palpalis*  
646 group, *G. palpalis* has three repetitive motifs and *G. fuscipes* five. Between the  
647 metallophosphoesterase/5`nucleotidase and the glutamate/aspartate/asparagine-rich regions  
648 there are a series of amino acids doublets comprising a lysine at the first position followed on  
649 the second position by another amino acid (glutamic acid, glycine, alanine, serine, asparagine  
650 or arginine). These differences may account for the differential immunogenic 'sub-Genus-  
651 specific' antibody response caused by Sgp3 in *Morsitans* and *Palpalis* group flies [90].

652 **Comparison of vision associated Rhodopsin genes reveals conservation of motion**  
653 **tracking receptors and variation in receptors sensitive to blue wavelengths (Figure 11).**

654 Vision plays an important role in host and mate seeking by flies within the *Glossina* genus. This  
655 aspect of their biology is a critical factor in the optimization and development of trap/target  
656 technologies [93, 94]. Analysis of the light sensitive Rhodopsin proteins across the *Glossina*  
657 species reveals orthologs to those described in the *G. m. morsitans* genome (Figure 11A). The  
658 expanded analysis provided by these additional genomes corroborates observations made for  
659 the original *G. m. morsitans* genome, including the conservation of the blue sensitive *Rh5*  
660 rhodopsin and the loss of one of the two dipteran UV-sensitive Rhodopsins: *Rh4* [26]. The  
661 availability of the new genomes provides complete sequences for an additional long wavelength  
662 sensitive Rhodopsin gene, *Rh2*. Prior to this analysis the recovery of a complete sequence from  
663 *G. m. morsitans* was not possible due to poor sequence quality at its locus.

664 Rhodopsin protein sequence divergence among the six *Glossina* species and *M. domestica* (as  
665 an outgroup) was investigated by calculating pairwise sequence divergence. As expected, the

666 average pairwise sequence divergence between *M. domestica* and any *Glossina* species is  
667 higher than maximum sequence divergence among *Glossina* species for any of the five  
668 investigated Rhodopsin subfamilies, ranging between 0.13 to 0.3 substitutions per 100 sites.  
669 Average sequence divergence of *G. brevipalpis* to other *Glossina* is consistently lower than  
670 *Musca* vs *Glossina* but also higher than the average pairwise distances between all other  
671 *Glossina*, suggesting the older evolutionary lineage of *G. brevipalpis* (Figure 11B).

672 Three interesting aspects emerge in the comparison between subfamilies at the level of  
673 sequence divergence between *Glossina* species. The *Rh1* subfamily, which is deployed in  
674 motion vision, has the lowest average sequence divergence suggesting the strongest level of  
675 purifying selection. *Rh2*, which is expressed in the ocelli, and *Rh5*, which is expressed in color-  
676 discriminating inner photoreceptors, are characterized by conspicuously higher than average  
677 sequence divergence among *Glossina* species. This observation could account for the varying  
678 attractivity of trap and targets to different tsetse species.

## 679 **Conclusions**

680 The comparative genomic analysis of these six *Glossina* species highlights important aspects of  
681 *Glossina* evolution and provides further insights into their unique biology. Additional comparative  
682 analyses of the genome assemblies, repetitive element composition, genes coding for  
683 neuropeptides and their receptors, cuticular protein genes, transcription factor genes and  
684 peritrophic matrix protein genes are available in the associated supplemental materials text,  
685 figures and data files (Supplemental Material; Supplemental Figures 10 and 13, Supplemental  
686 Tables 15, 16, 17, 18, 19; Supplemental Data 6 and 7). The results derived from the analysis of  
687 these genomes are applicable to many aspects of tsetse biology including host seeking,  
688 digestion, immunity, metabolism, endocrine function, reproduction and evolution. This expanded  
689 knowledge has important practical relevance. Indeed, tsetse control strategies utilize trapping as  
690 a key aspect of population management. These traps use both olfactory and visual stimuli to

691 attract tsetse. The findings of a reduced contingent of olfactory associated genes and the  
692 variability of color sensing Rhodopsin genes provide research avenues into improvements of  
693 trap efficacy. Deeper understanding of the important chemosensory and visual stimuli  
694 associated with the different species could facilitate the refinement of trap designs for specific  
695 species. The findings associated with *Glossina* digestive biology, including the enrichment of  
696 proteolysis-associated genes and identification of *Glossina* specific expansions of immune  
697 associated proteins provide new insights and avenues of investigation into vector competence  
698 and vector/parasite relationships. Analysis of the female and male reproduction associated  
699 genes reveals the differential evolutionary pressures on females and males. The conservation of  
700 female milk proteins across species highlights the fact that this unique biology is optimized and  
701 under strong negative evolutionary pressure. In counterpoint, male accessory gland derived  
702 seminal proteins appear to have evolved rapidly between *Glossina* species and with little  
703 conservation relative to other Diptera in gene orthology and functional conservation. Tsetse  
704 reproduction is slow due to their unique viviparous adaptations, making these adaptations a  
705 potential target for the development of new control measures. The knowledge derived from  
706 these comparisons provide context and new targets for functional analysis of the genetics and  
707 molecular biology of tsetse reproduction. In addition to the practical aspects of the knowledge  
708 derived from these analyses, they also provide a look at the genetics underlying the evolution of  
709 unique adaptive traits and the resources to develop deeper understanding of these processes.

## 710 **Materials and Methods:**

### 711 **Aim**

712 The aim of these studies was to generate and mine the genomic sequences of six species of  
713 tsetse flies with different ecological niches, host preferences and vectorial capacities. The goals  
714 of the analyses performed here are to identify novel genetic features specific to tsetse flies and  
715 to characterize differences between the *Glossina* species to correlate genetic changes with

716 phenotypic differences in these divergent species. This was accomplished by the analyses  
717 described below.

### 718 ***Glossina* strains**

719 All genomes were sequenced from DNA obtained from 2-4 lines of flies originating from  
720 individual pregnant females and their female offspring. Species collections were derived from  
721 laboratory strains with varied histories (See Supplemental Table 8). The *G. pallidipes*, *G.*  
722 *palpalis* and *G. fuscipes* flies were maintained in the laboratory at the Slovak Academy of  
723 Sciences in Bratislava, Slovakia. The *G. brevipalpis* strain were maintained in the Insect Pest  
724 Control Laboratory of the Joint FAO/IAEA Division of Nuclear Techniques in Food and  
725 Agriculture, Seibersdorf, Austria. Finally, *G. austeni* were obtained from the Tsetse  
726 Trypanosomiasis Research Institute in Tanga, Tanzania. Females were given two blood meals  
727 supplemented with 20 mg/ml tetracycline to cure them of symbionts to eliminate non-tsetse  
728 derived DNA.

### 729 **Genomic sequencing and assembly**

730 Total genomic DNA was isolated from female pools for each species. High quality/ high  
731 molecular weight DNA was isolated from individual flies using Genomic-tip purification columns  
732 (QIAGEN) and the associated buffer kit. Samples were treated according to the protocol for  
733 tissue-based DNA extraction. The pooled individual DNA isolates were utilized for sequencing  
734 on Illumina HiSeq2000 instruments. The sequencing plan followed the recommendations  
735 provided in the ALLPATHS-LG assembler [95]. Using this model, we targeted 45x sequence  
736 coverage each of fragments (overlapping paired reads ~180bp length) and 3kb paired end (PE)  
737 sequences as well as 5x coverage of 8kb PE sequences. The first draft assembly scaffold gaps  
738 of each species were closed where possible with mapping of the same species assembly input  
739 sequences (overlapping paired reads ~180bp length) and local gap assembly [96].  
740 Contaminating sequences and contigs 200bp or less were removed (Supplemental Table 9).

## 741 **Scaffold mapping to Muller Elements and Sex Specific Muller Element Expression Biases**

742 We mapped scaffolds in each *Glossina spp.* genome assembly to chromosomes using  
743 homology relationships with *D. melanogaster* (Supplemental Table 1). This method exploits the  
744 remarkable conservation of chromosome arm (Muller element) gene content across flies [33,  
745 97, 98]. We used the 1:1 orthologs between each *Glossina* species and *D. melanogaster* from  
746 OrthoDB [99] to assign scaffolds from each species to Muller elements, applying an approach  
747 previously developed for house fly [30]. For each species, a gene was assigned to a Muller  
748 element if it was a 1:1 ortholog with a *D. melanogaster* gene. Then, each scaffold was assigned  
749 to a Muller element if the majority (>50%) of genes with 1:1 orthologs on that scaffold were  
750 assigned to a single Muller element.

751 We used the RNA-seq data (described below) to compare gene expression in males and  
752 females. Expression comparisons were between male flies and either lactating (L) or non-  
753 lactating (NL) females.

## 754 **Repeat feature annotation**

755 Repeat libraries for each species were generated using RepeatModeler [100]. The resultant  
756 libraries were used to annotate the genome with RepeatMasker [101], alongside tandem and  
757 low complexity repeats identified with TRF [102] and DUST [103]. The proportion of the genome  
758 covered by repeats is shown in (Supplemental Table 10), with the figures for *G. m. morsitans*  
759 provided for comparison.

## 760 **Automated gene annotation**

761 Gene annotation was performed with MAKER [104], using the first 2 rounds to iteratively  
762 improve the training of the *ab initio* gene predictions derived from the combined Benchmarking  
763 Universal Single-Copy Orthologs (BUSCO) [105] and Core Eukaryotic Genes Mapping  
764 Approach (CEGMA) [106] HMMs, which were aligned to the genome assemblies using



765 GeneWise [107]. RNA-seq data for each species (described below) were used to build a  
766 reference-guided transcriptome assembly with Tophat [108] and Cufflinks [109]. The initial  
767 MAKER analysis produced unrealistically high numbers of gene models, so InterProScan [110]  
768 and OrthoMCL [111] were used to identify gene predictions which lacked strong evidence. Only  
769 gene models that met one or more of the following criteria were retained: (a) an annotation edit  
770 distance < 1 [112]; (b) at least one InterPro domain (other than simple coils or signal peptides);  
771 (c) an ortholog in the *Glossina* species complex. This process resulted in a reduction of 12-25%  
772 in the number of gene models for each species (Supplemental Table 11). Genes from all six  
773 species were assigned to 15,038 orthology groups via the Ensembl Compara 'GeneTrees'  
774 pipeline [113].

775 For all types of ncRNA except tRNA and rRNA genes, we predicted RNA gene models by  
776 aligning sequences from Rfam [114] against the genome using BLASTN [115]. The BLAST  
777 results were then used to seed Infernal [116] searches of the aligned regions with the  
778 corresponding Rfam covariance models. rRNA genes were predicted with RNAmmer [117], and  
779 tRNA genes with tRNAScan-SE [118].

## 780 **Manual gene annotation**

781 *Glossina* sequence data and annotation data were loaded into the Apollo [119] community  
782 annotation instances in VectorBase [120]. Manual annotations, primarily from a workshop held  
783 in Kenya in 2015, underwent both manual and automated quality control to remove incomplete  
784 and invalid modifications, and then merged with the automated gene set. Gene set versions are  
785 maintained at ([www.vectorbase.org](http://www.vectorbase.org)) for each organism. All highlighted cells relate to the current  
786 gene set version indicated in the table. Statistics for older gene set versions are provided along  
787 with the relevant version number.

## 788 **Genome completeness analysis (BUSCO and CEGMA Analysis)**

789 Quality of the genome assembly and training of the *ab initio* predictors used in the gene  
790 prediction pipeline was determined using the diptera\_odb9 database which represents 25  
791 Dipteran species and contains a total of 2799 BUSCO (Benchmarking Universal Single-Copy  
792 Orthologs) genes derived from the OrthoDB v9 dataset [105] (Supplemental Table 12).

### 793 **Identification of Horizontal Gene Transfer Events**

794 All genome sequence files for *G. pallidipes*, *G. palpalis*, *G. fuscipes*, *G. austeni*, and *G.*  
795 *brevipalpis* used for the whole genome assembly were also introduced into a custom pipeline for  
796 the identification of putative Horizontal Gene Transfer (HGT) events between *Wolbachia* and  
797 tsetse. *Wolbachia* sequences were filtered out from WGS reads using a combination of MIRA  
798 [121] and NextGenMap [122] mapping approaches. The reference sequences used were wMel  
799 (AE017196), wRi (CP001391), wBm (AE017321), wGmm (AWUH01000000), wHa  
800 (NC\_021089), wNo (NC\_021084), wOo (NC\_018267), wPip (NC\_010981), and the  
801 chromosomal insertions A and B in *G. morsitans morsitans*. All filtered putative *Wolbachia*-  
802 specific sequences were further examined using blast and custom-made databases.

803 To identify the chromosomal *Wolbachia* insertions, the following criteria were used: Sequences  
804 that (relative to the reference genomes): (a) exhibit high homology to insertion sequences A & B  
805 from *G. m. morsitans*, (b) exhibit a high degree of nucleotide polymorphisms (at least 10  
806 polymorphisms/100bp) with the reference genomes, and (c) contain a high degree of  
807 polymorphism coupled with insertions and/or deletions. *Wolbachia* specific sequences for each  
808 *Glossina* species were assembled with MIRA using a *de novo* approach. For *G. pallidipes*, *G.*  
809 *palpalis*, *G. fuscipes*, and *G. brevipalpis* assembled sequences corresponding only to  
810 cytoplasmic *Wolbachia* were identified. Genomic insertions were only observed in assembled  
811 sequences from *G. austeni* (Supplemental Table 2). The statistics for the *G. austeni* assembled  
812 sequences are as follows: N50 4493, N90 1191, and mean contig length, 2778bps. During the

813 process of identifying HGT events in *G. fuscipes*, we also recovered *Spiroplasma* sequences  
814 but none of the recovered sequences were chromosomal.

### 815 **Whole-genome pairwise alignment**

816 We generated all possible pairwise alignments between the six *Glossina* species (including *G.*  
817 *m. morsitans*) and an outgroup, *M. domestica*, using the Ensembl Compara software pipeline  
818 [123]. LASTZ [124] was used to create pairwise alignments, which were then joined to create  
819 'nets' representing the best alignment with respect to a reference genome [125]. *G. m.*  
820 *morsitans* was always used as the reference for any alignment of which it was a member,  
821 otherwise the reference genome was randomly assigned. Coverage statistics and configuration  
822 parameters for all alignments are available at  
823 [https://www.vectorbase.org/compara\\_analyses.html](https://www.vectorbase.org/compara_analyses.html).

### 824 **Glossina phylogeny prediction**

825 We identified orthologous genes across the six *Glossina* species and six outgroups (*M.*  
826 *domestica*, *D. melanogaster*, *D. ananassae*, *D. grimshawi*, *L. longipalpis*, and *A. gambiae*) by  
827 employing a reciprocal-best-hit (RBH) approach in which *G. m. morsitans* was used as focal  
828 species. We identified 286 orthologs with a clear reciprocal relationship among the 12 species.  
829 All orthologs were aligned individually using MAFFT [126] and concatenated in a super-  
830 alignment of 478,617 nucleotide positions. The nucleotide alignment was translated in the  
831 corresponding amino acids and passed through Gblocks [127] (imposing "half allowed gap  
832 positions" and leaving remaining parameters at default) to obtain a dataset of 117,783 amino  
833 acid positions. This dataset was used for a Maximum Likelihood analysis in RAxML [128]  
834 employing the LG+G+F model of replacement, and for a Bayesian analysis using Phylobayes  
835 [129, 130] employing the heterogeneous CAT+G model of replacement. We further performed a  
836 coalescent-aware analysis using Astral [131] and the 286 single gene trees obtained using

837 Raxml [128] and analyzing the alignments at the nucleotide level with the GTR+G model of  
838 replacement.

### 839 **Mitochondrial genome analysis and phylogeny**

840 The mtDNA genomes of *G. m. centralis* and *G. brevipalpis* were sequenced using the Illumina  
841 HiSeq system and about 15 kb of mitochondrial sequence of each species was obtained. These  
842 sequences were used to identify the mtDNA sequences within the sequenced tsetse genomes  
843 (*G. pallidipes*, *G. m. morsitans*, *G. p. gambiensis*, *G. f. fuscipes* and *G. austeni*) from the  
844 available genomic data. Sanger sequencing confirmed the mtDNA genome sequence of each  
845 tsetse species. This involved PCR amplification of the whole mtDNA genome using fourteen  
846 pairs of degenerate primers designed to cover the whole mitochondrial genomes of the  
847 sequences species (Supplemental Table 13). The PCR products were sent for Sanger  
848 sequencing. The sequences obtained by Sanger and Illumina sequencing for each species were  
849 assembled using the SegMan program from the lasergene software package (DNASTar Inc.,  
850 Madison, USA). The phylogenetic analysis based on these sequences was performed using  
851 maximum likelihood method with the MEGA 6.0 [132].

### 852 **Synteny analysis**

853 The synteny analysis was derived from whole genome alignments performed as follows using  
854 tools from the UCSC Genome Browser [133]. The LASTZ software package (version 1.02.00)  
855 generated the initial pairwise sequence alignments with the parameters:  $E=30$ ,  $H=2000$ ,  
856  $K=3000$ ,  $L=2200$ ,  $O=400$  and the default substitution matrix. From these alignments, Kent's  
857 toolbox (version 349) [133] was used to generate chain and nets (higher-level abstractions of  
858 pairwise sequence alignments) with the parameters:  $-verbose=0$   $-minScore=3000$  and  $-$   
859  $linearGap=medium$ . The multiple alignment format (MAF) files were built with MULTIZ for TBA  
860 package (version 01.21.09) [134], using the chains and nets, along with the phylogenetic  
861 relationships and distances between species. Using the MAF files, pairwise homologous

862 synteny blocks (HSBs) were automatically defined using the SyntenyTracker software [135].  
863 Briefly, the SyntenyTracker software defines an HSB as a set of two or more consecutive  
864 orthologous markers in homologous regions of the two genomes, such that no other defined  
865 HSB is within the region bordered by these markers. There are two exceptions to this rule: the  
866 first involves single orthologous markers not otherwise defined within HSBs; and the second  
867 involves two consecutive singleton markers separated by a distance less than the resolution  
868 threshold (10 kb for this analysis). As the 10 Kb blocks were too small for visualisation in Circos  
869 [136], they were aggregated into larger 100 Kb histogram blocks, where each 100 Kb Circos  
870 block shows the fraction of sequence identified as syntenic for a particular species when aligned  
871 to *D. melanogaster*. Synteny blocks are available for visualisation from the Evolution Highway  
872 comparative chromosome browser: <http://eh-demo.ncsa.uiuc.edu/drosophila/>.

### 873 **Orthology and paralogy inference and analysis**

874 Phylogenetic trees were inferred with the Ensembl Compara 'GeneTrees' pipeline [123, 137]  
875 using all species from the VectorBase database of arthropod disease vectors [120]. The trees  
876 include 33 non-*Glossina* species, such as *D. melanogaster*, which act as outgroup comparators.  
877 All analyses are based on the VectorBase April 2016 version of the phylogenetic trees.  
878 Representative proteins from all genes were clustered and aligned, and trees showing orthologs  
879 and paralogs were inferred with respect to the NCBI taxonomy tree  
880 (<http://www.ncbi.nlm.nih.gov/taxonomy>).

881 The 15,038 predicted gene trees containing *Glossina* sequences were parsed to quantify the  
882 trees based on their constituent species. Raw tree files (Supplemental Data 1) were parsed  
883 using a custom PERL script (Supplemental File 1) to determine gene counts for representative  
884 Dipteran species for each gene tree. Count data were imported into Excel and filtered using  
885 pivot tables to categorize orthology groups based upon species constitution (Supplemental Data  
886 2).

887 The orthology groups were broken into cohorts based on the phylogenetic composition of  
888 species within each group. The *Glossina* containing orthology groups were categorized as  
889 follows: common to Diptera (including the Nematocera sub-order), Brachycera sub-order  
890 specific, *Glossina* genus specific, *Glossina* sub-genus specific (*Morsitans* and *Palpalis*) or  
891 *Glossina* species specific. Each category is sub-divided into two groups, universal groups that  
892 contain representative sequences from all species within the phylogenetic category or partial  
893 orthology groups containing sequences from some but not all members of the phylogenetic  
894 category. *Glossina* gene IDs and associated FASTA sequences associated with groups of  
895 interest were extracted using a custom Perl script for gene ontology analysis (Supplemental File  
896 2)

#### 897 **Gene Ontology (GO) analysis**

898 Gene associated GO terms were obtained from the VectorBase annotation database via the  
899 BioMart interface. Genes from *Glossina* genus, and sub-genus specific orthology groups were  
900 isolated and tested for enrichment of GO terms. Analysis for GO terms for enrichment was  
901 performed with the R package “topGO”. The enriched genes were separated into species  
902 specific lists compared against the entirety of predicted protein-coding genes from the  
903 respective species. Significance of enrichment was determined using Fisher’s Exact Test  
904 (Supplemental Table 3 + Supplemental Data 3).

#### 905 **Identification and analysis of gene expansions/contractions**

906 Gene trees containing orthologs/paralogs representing each of the six *Glossina* species were  
907 analyzed to identify sub-genus associated gene expansions/contractions. Gene trees were  
908 considered for analysis if the variance in the number of orthologs/paralogs between the 6  
909 species was greater than 2. Variable gene trees were tested for phylogenetic significance  
910 relative to the predicted *Glossina* phylogeny using the CAFE software package [138] to reject  
911 potentially inaccurate variance predictions due to erroneous gene annotations. Gene trees with

912 a CAFE score of <0.05 were considered significant (Supplemental table 4 + Supplemental data  
913 4).

914 Sequences from gene trees satisfying the variance and CAFE thresholds were extracted with a  
915 custom PERL script (Supplemental File 2) and analyzed by BLASTP analysis against an insect  
916 specific subset of the NCBI NR database. Gene trees were annotated with the most common  
917 description associated with the top BLAST hits of its constituent sequences. Gene trees were  
918 subjected to PCA analysis in R using the FactoMineR and Factoextra packages using species  
919 specific gene counts as input data. The results were plotted and annotated with their associated  
920 BLAST derived descriptions.

#### 921 **RNA-seq data**

922 Total RNA was isolated for each of the six tsetse species from whole male and whole female  
923 (non-lactating and lactating) for RNA-seq library construction. Poly(A)+ RNA was isolated, then  
924 measured with an Agilent Bioanalyzer for quality. Samples were considered to be of high quality  
925 if they showed intact ribosomal RNA peaks and lacked signs of degradation. Samples passing  
926 quality control were used to generate non-normalized cDNA libraries with a modified version of  
927 the Nu-GEN Ovation® RNASeq System V2 (<http://www.nugeninc.com>). We sequenced each  
928 cDNA library (0.125 lane) on an Illumina HiSeq 2000 instrument (~36 Gb per lane) at 100 bp in  
929 length.

930 RNA-seq analyses were conducted based on methods described in Benoit et al. [77],  
931 Rosendale et al.[139], and Scolari et al.[140] with slight modifications. RNA-seq datasets were  
932 acquired from whole males, whole dry females, and whole lactating females. The SRA numbers  
933 for each of the libraries are listed in (Supplemental Table 14).

934 RNA-seq datasets were quality controlled using the FastQC (Babraham Bioinformatics)  
935 software package. Each set was trimmed/cleaned with CLC Genomics (Qiagen) and quality was

936 re-assessed with FastQC. Each dataset was mapped to the predicted genes from each  
937 *Glossina* genome with CLC Genomics. Each read required at least 95% similarity over 50% of  
938 length with three mismatches allowed. Transcripts per million (TPM) was used as a proxy for  
939 gene expression. Relative transcript abundance differences were determined as the TPM in one  
940 sample relative to the TPM of another dataset (e.g. male/lactating Female). A proportion based  
941 statistical analysis [141] followed by Bonferroni correction at 0.05 was used to identify genes  
942 with significant sex and stage specific transcript enrichment. This stringent statistical analysis  
943 was used as only one replicate was available for each treatment.

944 Enriched transcripts in lactating and dry transcriptomes from the species examined were  
945 compared to orthologous sequences in *G. m. morsitans* [142]. Overlap was determined by  
946 comparison of the enrichment status of orthologous sequences in the *Glossina* species tested.  
947 The results of this analysis are visualized in a Venn diagram  
948 (<http://bioinformatics.psb.ugent.be/webtools/Venn/>). Determination of dN/dS values and  
949 production of phylogenetic trees was conducted with the use of DataMonkey [143, 144] for  
950 dN/dS analyses and MEGA5 for alignment and tree construction [145].

### 951 **Cuticular Protein Analysis**

952 The predicted peptide sequences from each species were analyzed by BLASTp analysis [115]  
953 against characteristic sequence motifs derived from several families of cuticle proteins [146].  
954 Predicted cuticle proteins were further analyzed with CutProtFam-Pred, a cuticle protein  
955 prediction tool described in Ioannidou et al. [147], to assign genes to specific families of cuticle  
956 proteins. To find the closest putative homolog to cuticle protein genes in *Glossina*, genes were  
957 searched (BLASTp) against Refseq protein database from the National Center for  
958 Biotechnology Information (NCBI). The protein sequences with the lowest e-value were  
959 considered the closest putative homologs (Supplemental Data 5).

### 960 **Transcription factor identification and annotation**



961 Likely transcription factors (TFs) were identified by scanning the amino acid sequences of  
962 predicted protein-coding genes for putative DNA binding domains (DBDs). When possible, we  
963 predicted the DNA binding specificity of each TF using the procedures described in Weirauch *et*  
964 *al.* [148]. Briefly, we scanned all protein sequences for putative DBDs using the 81 Pfam [149]  
965 models listed in Weirauch and Hughes [150] and the HMMER tool [151], with the recommended  
966 detection thresholds of Per-sequence Eval < 0.01 and Per-domain conditional Eval < 0.01. Each  
967 protein was classified into a family based on its DBDs and their order in the protein sequence  
968 (e.g., bZIPx1, AP2x2, Homeodomain+Pou). We then aligned the resulting DBD sequences  
969 within each family using clustalOmega [152], with default settings. For protein pairs with multiple  
970 DBDs, each DBD was aligned separately. From these alignments, we calculated the sequence  
971 identity of all DBD sequence pairs (*i.e.* the percent of AA residues that are identical across all  
972 positions in the alignment). Using previously established sequence identity thresholds for each  
973 family [148], we mapped the predicted DNA binding specificities by simple transfer. For  
974 example, the DBD of the *G. austeni* GAUT024062-PA protein is identical to the DBD of *D.*  
975 *melanogaster* mirr (FBgn0014343). Since the DNA binding specificity of mirr has already been  
976 experimentally determined, and the cutoff for Homeodomain family of TFs is 70%, we can infer  
977 that GAUT024062-PA will have the same binding specificity as mirr. All associated data can be  
978 found in (Supplemental Data 6)

979

#### 980 **Abbreviations:**

981 DBD – DNA binding domain, HAT – Human African Trypanosomiasis, AAT – Animal African  
982 Trypanosomiasis, mtDNA – mitochondrial DNA, rRNA – ribosomal RNA, tRNA- transfer RNA,  
983 HGT – horizontal gene transfer, OG – orthology group, GO – gene ontology, OBP – odorant  
984 binding protein, miRNA – micro RNA, siRNA – small interfering RNA, piRNA – piwi interacting  
985 RNA, MGP – milk gland protein, MAG – male accessory gland, SFP – seminal fluid protein.

986 **Declarations:**

987 **Ethics approval and consent to participate:**

988 Not applicable

989 **Consent for publication:**

990 Not applicable

991 **Availability of data and material:**

992 The genomes, transcriptomes and predicted protein-coding sequences are available from  
993 VectorBase via the following link <https://www.vectorbase.org/taxonomy/glossina>. The raw RNA-  
994 seq datasets generated and/or analyzed during the current study are available from the NCBI  
995 SRA database repository, at the following link <https://www.ncbi.nlm.nih.gov/sra/SRP158014>.

996 All data generated during the analyses of these dataset are included in this published article and  
997 its supplementary information files.

998 **Competing interests:**

999 **Funding:**

1000 This work was supported by NIH Grants D43 TW007391, U01AI115648, R01AI051584,  
1001 R03TW008413 and R03TW009444 to SA. Grant R21AI109263 to GA and SA from NIH-NIAID,  
1002 Grant U54HG003079 from NIH-NHGRI to RKW and SA, McDonnell Genome Institute at  
1003 Washington University School of Medicine. Partial funding from the National Research  
1004 Foundation to HGM (Grant # 10924). Swiss National Science Foundation grant  
1005 PP00P3\_170664 to RMW. This research was partially supported by the Slovak Research and  
1006 Development Agency under the contract No. APVV-15-0604 entitled "Reduction of fecundity  
1007 and trypanosomiasis control of tsetse flies by the application of sterile insect techniques and  
1008 molecular methods".

1009 **Contributions** (& = Annotation group leader, \$ = Project leader)

1010 Analysis of whole genomic sequences and database management: D.L., E.L., G.L.M., M.B.;

1011 BUSCO and Female reproductive gene analysis: E.C.J., J.B.B.&, V.M.; Chemosensory gene

1012 analysis: D.M., P.O.M., R.W.M.; Cuticular protein gene analysis: A.J.R., D.W.F.; Gene orthology

1013 and expansion analyses: G.M.A.\$&, J.E.A.; Genome sequencing, assembly and analysis:

1014 WCW\$, C.T., P.M., R.K.W.; Horizontal gene transfer analysis: G.T., K.B.; Immune gene

1015 analysis: A.V., B.L.W., J.W., R.B.; Male reproductive gene analysis: A.R.M., F.S., G.S.;

1016 Mitochondrial DNA sequence analysis: A.M.M.A., I.M., A.G.P.; Molecular evolution and

1017 phylogenetic analyses: L.O., O R-S; Neuropeptide and G protein-coupled receptor analysis:

1018 H.G.M.&, J.C.&, L.S.; Rhodopsin gene analysis: M.F.; Orthology and comparative genomics

1019 analysis advice, manuscript editing: R.M.W.; Peritrophin gene analysis: A.A-S.&, C.R.; Project

1020 conception: S.A.\$, M.J.L.\$; Project funding: S.A.\$, Project management: S.A.\$, W.C.W.,

1021 Provision of experimental material: P.T., S.A.\$, A.M.M.A.; Salivary protein gene analysis:

1022 J.V.D.A., I.M.&, G.C., X.Z.; Symbiont associated gene analysis: R.R.&; Syntenic analysis of

1023 genomes: M.T.S., D.M.L., V.P.E.L.; Transcription factor and DNA binding motif prediction:

1024 M.T.W.; Transposable element analysis: A.H.V., W.J.M.; X chromosome and sex linked

1025 expression analysis: R.P.M.

1026 **Acknowledgements**

1027 We thank the production-sequencing group of McDonnell Genome Institute at Washington

1028 University for library construction, sequencing and data curation. Great thanks to the members

1029 of the Comparative Genomics workshop held at the Biotechnology Research Institute - Kenya

1030 Agricultural and Livestock Research Organization, Kikuyu, Kenya. Including: Muna Abry, Willis

1031 Adero, Erick Aroko, Joel Bargul, Tania Bishola, Lorna Jemosop Chebon, Appolinaire Djikeng,

1032 John Irungu, Everlyn Kamau, Christine Kamidi, Caleb Kibet, Esther Kimani, Kelvin Kimenyi,

1033 Mathuriin Koffi, Benard Kulohoma, Clarence Mangera, Abraham Mayoke, David Mburu, Grace

1034 Murilla, Mary Murithi, Ramadhan Mwakubambanya, Sarah Mwangi, Nelly Ndungu, Joyce  
1035 Njuguna, Benson Nyambega, Faith Obange, Samuel Ochieng, Edwin Ogola, Owallah (Martin)  
1036 Ogwang, Sylvance Okoth, Luicer Olubayo, Irene Onyango, Fred Osowo, David Price, Martin  
1037 Rono, Sharon Towett, Kelvin Wachiuri, Kevin Wamae and Mark Wamalwa.

1038 The workshop was sponsored by the D43 TW007391 award from the Fogarty International  
1039 Center to S.A. and was facilitated by: Yale School of Public Health, Kenya Agricultural and  
1040 Livestock Research Organization (KALRO), International Centre of Insect Physiology and  
1041 Ecology (ICIPE), South African National Bioinformatics Institute (SANBI), International Livestock  
1042 Research Institute (ILRI), Biosciences Eastern and Central Africa.

1043

1044 **Figure 1: Geographic distribution, ecology and vectorial capacity of sequenced *Glossina***  
1045 **species.** Visual representation of the geographic distribution of the sequenced *Glossina* species  
1046 across the African continent. Ecological preferences and vectorial capacities are described for  
1047 each associated group.

1048 **Figure 2: *Glossina* whole genome alignment, phylogenetic analysis of orthologous**  
1049 **protein-coding nuclear genes and phylogenetic analysis of mitochondrial sequences.**

1050 A. Analysis of whole genome and protein-coding sequence alignment. The left graph reflects the  
1051 percentage of total genomic sequence aligning to the *G. m. morsitans* reference. The right side  
1052 of the graph represents alignment of all predicted coding sequences from the genomes with  
1053 coloration representing matches, mismatches, insertions and uncovered exons. B. Phylogenetic  
1054 tree from conserved protein-coding sequences. Black dots at nodes indicate full support from  
1055 Maximum likelihood (Raxml), Bayesian (Phylobayes), and coalescent-aware (Astral) analyses.  
1056 Raxml and Phylobayes analyses are based on an amino acid dataset of 117,782 positions from  
1057 286 genes from 12 species. Astral analyses is based on a 1125 nucleotide dataset of 478,617  
1058 positions from the 6 *Glossina* (full trees are in Supplemental Figure 1A-C). C. Molecular  
1059 phylogeny derived from whole mitochondrial genome sequences. The analysis was performed  
1060 using the maximum likelihood method with MEGA 6.0.

1061 **Figure 3: Visualization of syntenic block analysis data and predicted Muller Element**  
1062 **sizes**

1063 Level of syntenic conservation between tsetse scaffolds and *Drosophila* chromosomal  
1064 structures (Muller Elements). The color-coded concentric circles consisting of bars represent the  
1065 percent of syntenic conservation of orthologous protein-coding gene sequences between the  
1066 *Glossina* genomic scaffolds and *Drosophila* Muller elements. Each bar represents 100 kb of  
1067 aligned sequence and bar heights represent the percent of syntenic conservation. The graphs  
1068 on the periphery of the circle illustrate the combined predicted length and number of genes

1069 associated with the Muller elements for each tsetse species. The thin darkly colored bars  
1070 represent the number of 1:1 orthologs between each *Glossina* species and *D. melanogaster*.  
1071 The thicker lightly colored bands represent the predicted length of each Muller element for each  
1072 species. This was calculated as the sum of the lengths of all scaffolds mapped to those Muller  
1073 elements.

1074 **Figure 4: Homology map of the *Wolbachia* derived cytoplasmic and horizontal transfer**  
1075 **derived nuclear sequences.** Circular map of the *G. austeni* *Wolbachia* horizontal transfer  
1076 derived genomic sequences (*wGau* - blue), the *D. melanogaster* *Wolbachia* cytoplasmic  
1077 genome sequence (*wMel* - green), the *G. m. morsitans* *Wolbachia* cytoplasmic genome  
1078 sequence (*wGmm* - red), and the *Wolbachia* derived chromosomal insertions A & B from *G. m.*  
1079 *morsitans* (*wGmm* Insertion A and Insertion B yellow and light yellow respectively). The  
1080 outermost circle represents the scale in kbp. Contigs for the *wGau* sequences, *wGmm* and the  
1081 chromosomal insertions A & B in *G. m. morsitans* are represented as boxes. Regions of  
1082 homology between the *G. austeni* insertions and the other sequences are represented by  
1083 orange ribbons. Black ribbons represent syntenic regions between the *wGau* insertions and the  
1084 cytoplasmic genomes of *wGmm* and *wMel*.

1085 **Figure 5: Constituent analysis of *Glossina* associated gene orthology groups.**  
1086 Visualization of relative constitution of orthology groups containing *Glossina* gene sequences.  
1087 Combined bar heights represent the combined orthogroups associated with each *Glossina*  
1088 species. The bars are color-coded to reflect the level of phylogenetic representation of clusters  
1089 of orthogroups at the order, sub-order, genus, sub-genus and species. Saturated bars represent  
1090 orthology groups specific and universal to a phylogenetic level. Desaturated bars represent  
1091 orthogroups specific to a phylogenetic level but lack universal representation across all included  
1092 species. Gene ontology analysis of specific and universal groups can be found in Table 3.

1093 **Figure 6: Sub-genus specific gene family expansions/retractions.** Principal component  
1094 analysis-based clustering of gene orthology groups showing significant differences in the  
1095 number of representative sequences between the six *Glossina* species. Orthology groups  
1096 included have sub-genus specific expansions/contractions as determined by CAFE test (P-value  
1097 < 0.05). Detailed information regarding the functional associations of the unlabeled groups is  
1098 provided in Supplemental Figures 10+11 and in Supplemental Table 4.

1099 **Figure 7: Heat map of counts of *Glossina* homologs to *Drosophila* immune genes.** Counts  
1100 of *Glossina* sequences within ortholog groups containing *Drosophila* genes annotated with the  
1101 “Immune System Process” GO tag (GO:0002376).

1102 **Figure 8: Conservation of synteny, sequence homology and stage/sex specific**  
1103 **expression of tsetse milk proteins between species.** Overview of the conservation of tsetse  
1104 milk protein genes and their expression patterns in males, non-lactating and lactating females.  
1105 A.) Syntenic analysis of gene structure/conservation in the *mgp2-10* genetic locus across  
1106 *Glossina* species. B.) Phylogenetic analysis of orthologs from the *mgp2-10* gene family. C.)  
1107 Combined sex and stage specific RNA-seq analysis of relative gene expression of the 12 milk  
1108 protein gene orthologs in males, non-lactating and lactating females of 5 *Glossina* species. D.)  
1109 Visualization of fold change in individual milk protein gene orthologs across 5 species between  
1110 lactating and non-lactating female flies. Gene sequence substitution rates are listed for each set  
1111 of orthologous sequences. E.) Comparative enrichment analysis of differentially expressed  
1112 genes between non-lactating and lactating female flies.

1113 **Figure 9: Comparative analysis of *Glossina* male accessory gland (MAG) protein family**  
1114 **memberships**  
1115 Graphical representation of the putative *Glossina* orthologs and paralogs to characterized MAG  
1116 genes from *G. m. morsitans*. The genes are categorized by their functional classes as derived  
1117 by orthology to characterized proteins from *Drosophila* and other insects.

1118 **Figure 10: 5’Nuc/apyrase salivary gene family organization and sequence features across**  
1119 **Glossina species.** A.) Chromosomal organization of the 5’Nuc/apyrase family orthologs on  
1120 genome scaffolds from the six *Glossina* species. The brown gene annotations represent 5’Nuc  
1121 gene orthologs; purple gene annotations represent *sgp3* gene orthologs and the blue gene  
1122 annotations an apyrase-like encoding gene. The broken rectangular bars on the *G. brevipalpis*  
1123 scaffold indicate that the sequence could not be determined due to poor sequence/assembly  
1124 quality. B.) Schematic representation of *sgp3* gene structure in tsetse species. The K(.) denotes  
1125 a repetition of a Lysine (K) and another amino acid (Glutamic acid, Glycine, Alanine, Serine,  
1126 Asparagine or Arginine). The green oval represents a repetitive motif found in *Morsitans* sub-  
1127 genus; the red oval represents a repetitive motif found in *Palpalis* group. The dashed line  
1128 indicates a partial motif present. For each of the two motifs the consensus sequence is shown in  
1129 the right by a Logo sequence. The poor sequence/assembly quality of the *G. brevipalpis*  
1130 scaffold prevented inclusion of this orthology in the analysis.

1131 **Figure 11: Phylogenetic and sequence divergence analysis of Glossina vision associated**  
1132 **proteins.** Phylogenetic and sequence conservation analysis of the vision associated *Rhodopsin*  
1133 G-protein coupled receptor genes in *Glossina* and orthologous sequences in other insects. A.)  
1134 Phylogenetic analysis of Rhodopsin protein sequences. B.) Pairwise analysis of sequence  
1135 divergence between *M. domestica* and *Glossina* species and within the *Glossina* genus.

1136 **Supplemental Figure 1:** Maximum Likelihood, Bayesian and Astral based phylogenetic  
1137 analysis of a concatenated single gene ortholog alignment.

1138 **Supplemental Figure 2:** Tsetse variable mitochondrial DNA sequence and species delineation  
1139 by high resolution melt curve analysis

1140 **Supplemental Figure 3:** Application of high-resolution melt curve analysis to distinguish Tsetse  
1141 haplotypes/populations



1142 **Supplemental Figure 4:** The percent of female-, male-, and un-biased genes that are on an X  
1143 chromosome scaffold (Muller elements A, D, or F) is plotted for each species. Sex-biased  
1144 expression was measured between males and either lactating (L) or non-lactating (NL) females.  
1145 Asterisks indicate a significant difference between the percent of sex-biased genes that are X-  
1146 linked when compared to unbiased genes (\* $P < 0.05$  in Fisher's exact test).

1147 **Supplemental Figure 5:** The distribution of the log<sub>2</sub> (fold-change between females and males)  
1148 is plotted for autosomal and X-linked genes in each species. Female-male gene expression  
1149 comparisons are between males and either lactating or non-lactating females.

1150 **Supplemental Figure 6:** Rates of non-synonymous to synonymous substitution (dN/dS) along  
1151 different evolutionary lineages within the *Glossina* genus.

1152 **Supplemental Figure 7:** Rates of non-synonymous to synonymous substitution (dN/dS) rates  
1153 of female, male and non-sex biased genes across the X and autosomal muller elements.

1154 **Supplemental Figure 8:** The distribution of male biased gene expression across the predicted  
1155 *Glossina* Muller Elements. Bar heights represent the percentage of genes per element with  
1156 male biased gene expression.

1157 **Supplemental Figure 9:** Rates of non-synonymous to synonymous substitution (dN/dS) rates  
1158 across the predicted muller elements.

1159 **Supplemental Figure 10: Repetitive element constitution of *Glossina* genomes.** Analysis of  
1160 repetitive element composition across the six *Glossina* species. A.) Graphical representation of  
1161 the constitution and sequence coverage by the various classes of identified repetitive elements.  
1162 B.) Relative constitution of DNA Terminal Inverted Repeat (TIR) families across the *Glossina*  
1163 genomes. C.) Relative constitution of Long Interspersed Nuclear Elements (LINEs) across the  
1164 *Glossina* genomes.

1165 **Supplemental Figure 11: Sub-genus specific gene family expansions/retractions (with**  
1166 **functional annotations).** Principal component analysis-based clustering of gene orthology  
1167 groups showing significant differences in the number of representative sequences between the  
1168 six *Glossina* species.

1169 **Supplemental Figure 12: Sub-genus specific gene family expansions/retractions (with**  
1170 **orthology group number annotations).** Principal component analysis-based clustering of  
1171 gene orthology groups showing significant differences in the number of representative  
1172 sequences between the six *Glossina* species.

1173 **Supplemental Figure 13: Distribution of transcription factor families across insect**  
1174 **genomes.** Heatmap depicting the abundance of transcription factor (TF) families across a  
1175 collection of insect genomes. Each entry indicates the number of TF genes for the given family  
1176 in the given genome, based on presence of DNA binding domains. Color key is depicted at the  
1177 top (light blue means the TF family is completely absent) – note log (base 2) scale.

## 1178 **References:**

- 1179 1. Lyons M: *The Colonial Disease. A social History of Sleeping Sickness in Norther Zaire, 1900-1940.*  
1180 Cambridge UK: Cambridge University Press; 1992.
- 1181 2. Odiit M, Coleman PG, Liu WC, McDermott JJ, Fevre EM, Welburn SC, Woolhouse ME:  
1182 **Quantifying the level of under-detection of *Trypanosoma brucei rhodesiense* sleeping sickness**  
1183 **cases.** *Trop Med Int Health* 2005, **10**:840-849.
- 1184 3. Franco JR, Cecchi G, Priotto G, Paone M, Diarra A, Grout L, Simarro PP, Zhao W, Argaw D:  
1185 **Monitoring the elimination of human African trypanosomiasis: Update to 2016.** *PLoS Negl Trop*  
1186 *Dis* 2018, **12**:e0006890.
- 1187 4. Franco JR, Simarro PP, Diarra A, Ruiz-Postigo JA, Jannin JG: **The journey towards elimination of**  
1188 **gambiense human African trypanosomiasis: not far, nor easy.** *Parasitology* 2014, **141**:748-760.
- 1189 5. Steelman CD: **Effects of external and internal arthropod parasites on domestic livestock**  
1190 **production.** *Annual Review of Entomology* 1976, **21**:155-178.
- 1191 6. Jordan A: *Trypanosomiasis Control and African Rural Development.* London: Longman; 1986.
- 1192 7. Budd LT: *Tsetse and Trypanosomiasis Research and Development since 1980: an Economic*  
1193 *Analysis.* UK; 1999.
- 1194 8. Alsan M: **The Effect of the TseTse Fly on African Development.** *American Economic Review*  
1195 2015, **105**:382-410.
- 1196 9. Opigo J, Woodrow C: **NECT trial: more than a small victory over sleeping sickness.** *Lancet* 2009,  
1197 **374**:7-9.

- 1198 10. Mesu V, Kalonji WM, Bardonneau C, Mordt OV, Blesson S, Simon F, Delhomme S, Bernhard S,  
1199 Kuziena W, Lubaki JF, et al: **Oral fexinidazole for late-stage African Trypanosoma brucei**  
1200 **gambiense trypanosomiasis: a pivotal multicentre, randomised, non-inferiority trial.** *Lancet*  
1201 2018, **391**:144-154.
- 1202 11. Buscher P, Deborggraeve S: **How can molecular diagnostics contribute to the elimination of**  
1203 **human African trypanosomiasis?** *Expert Rev Mol Diagn* 2015, **15**:607-615.
- 1204 12. Anene BM, Onah DN, Nawa Y: **Drug resistance in pathogenic African trypanosomes: what**  
1205 **hopes for the future?** *Vet Parasitol* 2001, **96**:83-100.
- 1206 13. Geerts S, Holmes PH, Eisler MC, Diall O: **African bovine trypanosomiasis: the problem of drug**  
1207 **resistance.** *Trends Parasitol* 2001, **17**:25-28.
- 1208 14. Lehane M, Alfaroukh I, Bucheton B, Camara M, Harris A, Kaba D, Lumbala C, Peka M, Rayaisse JB,  
1209 Waiswa C, et al: **Tsetse Control and the Elimination of Gambian Sleeping Sickness.** *PLoS Negl*  
1210 *Trop Dis* 2016, **10**:e0004437.
- 1211 15. Solano P, Torr SJ, Lehane MJ: **Is vector control needed to eliminate gambiense human African**  
1212 **trypanosomiasis?** *Front Cell Infect Microbiol* 2013, **3**:33.
- 1213 16. Courtin F, Camara M, Rayaisse JB, Kagbadouno M, Dama E, Camara O, Traore IS, Rouamba J,  
1214 Peylhard M, Somda MB, et al: **Reducing Human-Tsetse Contact Significantly Enhances the**  
1215 **Efficacy of Sleeping Sickness Active Screening Campaigns: A Promising Result in the Context of**  
1216 **Elimination.** *PLoS Negl Trop Dis* 2015, **9**:e0003727.
- 1217 17. Ilboudo H, Jamonneau V, Camara M, Camara O, Dama E, Leno M, Ouendeno F, Courtin F,  
1218 Sakande H, Sanon R, et al: **Diversity of response to Trypanosoma brucei gambiense infections**  
1219 **in the Forecariah mangrove focus (Guinea): perspectives for a better control of sleeping**  
1220 **sickness.** *Microbes Infect* 2011, **13**:943-952.
- 1221 18. Molyneux DH: **Animal reservoirs and Gambian trypanosomiasis.** *Ann Soc Belg Med Trop* 1973,  
1222 **53**:605-618.
- 1223 19. Kabayo JP: **Aiming to eliminate tsetse from Africa.** *Trends Parasitol* 2002, **18**:473-475.
- 1224 20. Krafsur ES: **Tsetse flies: genetics, evolution, and role as vectors.** *Infect Genet Evol* 2009, **9**:124-  
1225 141.
- 1226 21. Travassos Santos Dias J: **Contribuição para o estudo da sistemática do género Glossina**  
1227 **Wiedemann 1830 (Insecta, Brachycera, Cyclorhapha, Glossinidae) Proposta para a criação de**  
1228 **um novo subgénero.** *Garcia de Orta, Ser Zool, Lisboa* 1987, **14**:67-78.
- 1229 22. Rogers D, Robinson T: **Tsetse distribution.** In *The Trypanosomiasis*. Edited by Maudlin I, Holmes  
1230 P, Miles M. Oxford: CAB International;; 2004: 139–179.
- 1231 23. Moloo SK, Kabata JM, Sabwa CL: **A study on the maturation of procyclic Trypanosoma brucei**  
1232 **brucei in Glossina morsitans centralis and G. brevipalpis.** *Medical and Veterinary Entomology*  
1233 1994, **8**:369-374.
- 1234 24. Motloang M, Masumu J, Mans B, Van den Bossche P, Latif A: **Vector competence of Glossina**  
1235 **austeni and Glossina brevipalpis for Trypanosoma congolense in KwaZulu-Natal, South Africa.**  
1236 *Onderstepoort Journal of Veterinary Research* 2012, **79**:E1-6.
- 1237 25. Aksoy S, Berriman M, Hall N, Hattori M, Hide W, Lehane MJ: **A case for a Glossina genome**  
1238 **project.** *Trends in Parasitology* 2005, **21**:107-111.
- 1239 26. Initiative IGG: **Genome sequence of the tsetse fly (Glossina morsitans): vector of African**  
1240 **trypanosomiasis.** *Science* 2014, **344**:380-386.
- 1241 27. Dyer NA, Lawton SP, Ravel S, Choi KS, Lehane MJ, Robinson AS, Okedi LM, Hall MJ, Solano P,  
1242 Donnelly MJ: **Molecular phylogenetics of tsetse flies (Diptera: Glossinidae) based on**  
1243 **mitochondrial (COI, 16S, ND2) and nuclear ribosomal DNA sequences, with an emphasis on**  
1244 **the palpalis group.** *Molecular phylogenetics and evolution* 2008, **49**:227-239.

- 1245 28. Gooding RH, Krafsur ES: **Tsetse genetics: contributions to biology, systematics, and control of**  
1246 **tsetse flies.** *Annual review of entomology* 2005, **50**:101-123.
- 1247 29. Petersen FT, Meier R, Kutty SN, Wiegmann BM: **The phylogeny and evolution of host choice in**  
1248 **the Hippoboscoidea (Diptera) as reconstructed using four molecular markers.** *Mol Phylogenet*  
1249 *Evol* 2007, **45**:111-122.
- 1250 30. Meisel RP, Scott JG, Clark AG: **Transcriptome Differences between Alternative Sex Determining**  
1251 **Genotypes in the House Fly, *Musca domestica*.** *Genome Biol Evol* 2015, **7**:2051-2061.
- 1252 31. Brelsfoard C, Tsiamis G, Falchetto M, Gomulski L, Telleria E, Alam U, Ntountoumis E, Scolari F,  
1253 Swain M, Takac P, et al: ***Wolbachia* symbiont genome sequence and extensive chromosomal**  
1254 **insertions present in the host *Glossina morsitans morsitans* genome.** *PLoS Neglected Tropical*  
1255 *Diseases* 2014, **8**:e2728.
- 1256 32. J. MH: **Bearings of the 'Drosophila' work on systematics.** In *The New Systematics*. Edited by J. H.  
1257 Oxford: Clarendon; 1940: 185-268
- 1258 33. Vicoso B, Bachtrog D: **Numerous transitions of sex chromosomes in Diptera.** *PLoS Biol* 2015,  
1259 **13**:e1002078.
- 1260 34. Schaeffer SW, Bhutkar A, McAllister BF, Matsuda M, Matzkin LM, O'Grady PM, Rohde C, Valente  
1261 VL, Aguade M, Anderson WW, et al: **Polytene chromosomal maps of 11 *Drosophila* species: the**  
1262 **order of genomic scaffolds inferred from genetic and physical maps.** *Genetics* 2008, **179**:1601-  
1263 1655.
- 1264 35. Willhoeft U: **Fluorescence in situ hybridization of ribosomal DNA to mitotic chromosomes of**  
1265 **tsetse flies (Diptera: Glossinidae: Glossina).** *Chromosome Research* 1997, **5**:262-267.
- 1266 36. Papa F, Windbichler N, Waterhouse RM, Cagnetti A, D'Amato R, Persampieri T, Lawniczak MKN,  
1267 Nolan T, Papathanos PA: **Rapid evolution of female-biased genes among four species of**  
1268 ***Anopheles malaria* mosquitoes.** *Genome Res* 2017, **27**:1536-1548.
- 1269 37. Meisel RP, Connallon T: **The faster-X effect: integrating theory and data.** *Trends Genet* 2013,  
1270 **29**:537-544.
- 1271 38. Charlesworth B, Coyne JA, Barton NH: **The Relative Rates of Evolution of Sex Chromosomes and**  
1272 **Autosomes.** *The American Naturalist* 1987, **130**:113-146.
- 1273 39. Mank JE, Vicoso B, Berlin S, Charlesworth B: **Effective population size and the Faster-X effect:**  
1274 **empirical results and their interpretation.** *Evolution* 2010, **64**:663-674.
- 1275 40. Meisel RP: **Towards a more nuanced understanding of the relationship between sex-biased**  
1276 **gene expression and rates of protein-coding sequence evolution.** *Mol Biol Evol* 2011, **28**:1893-  
1277 1900.
- 1278 41. Larracuent AM, Sackton TB, Greenberg AJ, Wong A, Singh ND, Sturgill D, Zhang Y, Oliver B, Clark  
1279 AG: **Evolution of protein-coding genes in *Drosophila*.** *Trends Genet* 2008, **24**:114-123.
- 1280 42. Leung W, Shaffer CD, Reed LK, Smith ST, Barshop W, Dirkes W, Dothager M, Lee P, Wong J, Xiong  
1281 D, et al: ***Drosophila* Muller F Elements Maintain a Distinct Set of Genomic Properties Over 40**  
1282 **Million Years of Evolution.** *G3: Genes/Genomes/Genetics* 2015, **5**:719.
- 1283 43. Brelsfoard C, Tsiamis G, Falchetto M, Gomulski LM, Telleria E, Alam U, Doudoumis V, Scolari F,  
1284 Benoit JB, Swain M, et al: **Presence of extensive *Wolbachia* symbiont insertions discovered in**  
1285 **the genome of its host *Glossina morsitans morsitans*.** *PLoS Negl Trop Dis* 2014, **8**:e2728.
- 1286 44. Doudoumis V, Alam U, Aksoy E, Abd-Alla AM, Tsiamis G, Brelsfoard C, Aksoy S, Bourtzis K:  
1287 **Tsetse-*Wolbachia* symbiosis: comes of age and has great potential for pest and disease**  
1288 **control.** *J Invertebr Pathol* 2013, **112** Suppl:S94-103.
- 1289 45. Wu DD, Wang GD, Irwin DM, Zhang YP: **A profound role for the expansion of trypsin-like serine**  
1290 **protease family in the evolution of hematophagy in mosquito.** *Mol Biol Evol* 2009, **26**:2333-  
1291 2341.

- 1292 46. Gorman MJ, Paskewitz SM: **Serine proteases as mediators of mosquito immune responses.**  
1293 *Insect Biochem Mol Biol* 2001, **31**:257-262.
- 1294 47. LaFlamme BA, Ram KR, Wolfner MF: **The *Drosophila melanogaster* seminal fluid protease**  
1295 **"seminase" regulates proteolytic and post-mating reproductive processes.** *PLoS Genet* 2012,  
1296 **8**:e1002435.
- 1297 48. Sirot LK, Findlay GD, Sitnik JL, Frasher D, Avila FW, Wolfner MF: **Molecular characterization and**  
1298 **evolution of a gene family encoding both female- and male-specific reproductive proteins in**  
1299 ***Drosophila*.** *Mol Biol Evol* 2014, **31**:1554-1567.
- 1300 49. Hamilton JV, Munks RJ, Lehane SM, Lehane MJ: **Association of midgut defensin with a novel**  
1301 **serine protease in the blood-sucking fly *Stomoxys calcitrans*.** *Insect Mol Biol* 2002, **11**:197-205.
- 1302 50. Larter NK, Sun JS, Carlson JR: **Organization and function of *Drosophila* odorant binding**  
1303 **proteins.** *Elife* 2016, **5**.
- 1304 51. Leal WS: **Odorant reception in insects: roles of receptors, binding proteins, and degrading**  
1305 **enzymes.** *Annu Rev Entomol* 2013, **58**:373-391.
- 1306 52. Benoit JB, Vigneron A, Broderick NA, Wu Y, Sun JS, Carlson JR, Aksoy S, Weiss BL: **Symbiont-**  
1307 **induced odorant binding proteins mediate insect host hematopoiesis.** *Elife* 2017, **6**.
- 1308 53. Scolari F, Benoit JB, Michalkova V, Aksoy E, Takac P, Abd-Alla AM, Malacrida AR, Aksoy S,  
1309 Attardo GM: **The Spermatophore in *Glossina morsitans morsitans*: Insights into Male**  
1310 **Contributions to Reproduction.** *Scientific Reports* 2016, **6**:20334.
- 1311 54. Doudoumis V, Blow F, Saridaki A, Augustinos A, Dyer NA, Goodhead I, Solano P, Rayaisse JB,  
1312 Takac P, Mekonnen S, et al: **Challenging the *Wigglesworthia*, *Sodalis*, *Wolbachia* symbiosis**  
1313 **dogma in tsetse flies: *Spiroplasma* is present in both laboratory and natural populations.** *Sci*  
1314 *Rep* 2017, **7**:4699.
- 1315 55. Tschopp A, Riedel M, Kropf C, Nentwig W, Klopstein S: **The evolution of host associations in the**  
1316 **parasitic wasp genus *Ichneumon* (Hymenoptera: Ichneumonidae): convergent adaptations to**  
1317 **host pupation sites.** *BMC Evol Biol* 2013, **13**:74.
- 1318 56. Pandey RR, Homolka D, Chen KM, Sachidanandam R, Fauvarque MO, Pillai RS: **Recruitment of**  
1319 **Armitage and Yb to a transcript triggers its phased processing into primary piRNAs in**  
1320 ***Drosophila* ovaries.** *PLoS Genet* 2017, **13**:e1006956.
- 1321 57. Miesen P, Joosten J, van Rij RP: **PIWIs Go Viral: Arbovirus-Derived piRNAs in Vector**  
1322 **Mosquitoes.** *PLoS Pathog* 2016, **12**:e1006017.
- 1323 58. Avidor-Reiss T, Maer AM, Koundakjian E, Polyanovsky A, Keil T, Subramaniam S, Zuker CS:  
1324 **Decoding cilia function: defining specialized genes required for compartmentalized cilia**  
1325 **biogenesis.** *Cell* 2004, **117**:527-539.
- 1326 59. Ravel S, de Meeus T, Dujardin JP, Zeze DG, Gooding RH, Dusfour I, Sane B, Cuny G, Solano P: **The**  
1327 **tsetse fly *Glossina palpalis palpalis* is composed of several genetically differentiated small**  
1328 **populations in the sleeping sickness focus of Bonon, Cote d'Ivoire.** *Infect Genet Evol* 2007,  
1329 **7**:116-125.
- 1330 60. Starostina E, Xu A, Lin H, Pikielny CW: **A *Drosophila* protein family implicated in pheromone**  
1331 **perception is related to Tay-Sachs GM2-activator protein.** *J Biol Chem* 2009, **284**:585-594.
- 1332 61. Baumann AA, Benoit JB, Michalkova V, Mireji PO, Attardo GM, Moulton JK, Wilson TG, Aksoy S:  
1333 **Juvenile hormone and insulin suppress lipolysis between periods of lactation during tsetse fly**  
1334 **pregnancy.** *Mol Cell Endocrinol* 2013, **372**:30-41.
- 1335 62. Buchon N, Silverman N, Cherry S: **Immunity in *Drosophila melanogaster*--from microbial**  
1336 **recognition to whole-organism physiology.** *Nat Rev Immunol* 2014, **14**:796-810.
- 1337 63. Dziarski R, Gupta D: **The peptidoglycan recognition proteins (PGRPs).** *Genome Biol* 2006, **7**:232.

- 1338 64. Vigneron A, Aksoy E, Weiss BL, Bing X, Zhao X, Awuoché EO, O'Neill MB, Wu Y, Attardo GM,  
1339 Aksoy S: **A fine-tuned vector-parasite dialogue in tsetse's cardia determines peritrophic matrix**  
1340 **integrity and trypanosome transmission success.** *PLoS Pathog* 2018, **14**:e1006972.
- 1341 65. Macleod ET, Maudlin I, Darby AC, Welburn SC: **Antioxidants promote establishment of**  
1342 **trypanosome infections in tsetse.** *Parasitology* 2007:1-5.
- 1343 66. Hao Z, Kasumba I, Lehane MJ, Gibson WC, Kwon J, Aksoy S: **Tsetse immune responses and**  
1344 **trypanosome transmission: implications for the development of tsetse-based strategies to**  
1345 **reduce trypanosomiasis.** *Proceedings of the National Academy of Sciences, USA* 2001, **98**:12648-  
1346 12653.
- 1347 67. Aksoy S, Weiss BL, Attardo GM: **Trypanosome Transmission Dynamics in Tsetse.** *Curr Opin*  
1348 *Insect Sci* 2014, **3**:43-49.
- 1349 68. Hu C, Aksoy S: **Innate immune responses regulate trypanosome parasite infection of the tsetse**  
1350 **fly *Glossina morsitans morsitans*.** *Molecular Microbiology* 2006, **60**:1194-1204.
- 1351 69. Scott JG, Warren WC, Beukeboom LW, Bopp D, Clark AG, Giers SD, Hediger M, Jones AK, Kasai S,  
1352 Leichter CA, et al: **Genome of the house fly, *Musca domestica* L., a global vector of diseases**  
1353 **with adaptations to a septic environment.** *Genome Biol* 2014, **15**:466.
- 1354 70. Valanne S, Myllymaki H, Kallio J, Schmid MR, Kleino A, Murumagi A, Airaksinen L, Kotipelto T,  
1355 Kaustio M, Ulvila J, et al: **Genome-wide RNA interference in *Drosophila* cells identifies G**  
1356 **protein-coupled receptor kinase 2 as a conserved regulator of NF-kappaB signaling.** *J Immunol*  
1357 2010, **184**:6188-6198.
- 1358 71. Lehane MJ, Aksoy S, Gibson W, Kerhornou A, Berriman M, Hamilton J, Soares MB, Bonaldo MF,  
1359 Lehane S, Hall N: **Adult midgut expressed sequence tags from the tsetse fly *Glossina morsitans***  
1360 ***morsitans* and expression analysis of putative immune response genes.** *Genome Biology* 2003,  
1361 **4**:R63.
- 1362 72. Aksoy E, Vigneron A, Bing X, Zhao X, O'Neill M, Wu YN, Bangs JD, Weiss BL, Aksoy S: **Mammalian**  
1363 **African trypanosome VSG coat enhances tsetse's vector competence.** *Proc Natl Acad Sci U S A*  
1364 2016, **113**:6961-6966.
- 1365 73. Nakamura K, Ida H, Yamaguchi M: **Transcriptional regulation of the *Drosophila moira* and *osa***  
1366 **genes by the DREF pathway.** *Nucleic Acids Res* 2008, **36**:3905-3915.
- 1367 74. Gloria-Soria A, Dunn WA, Yu X, Vigneron A, Lee K-Y, Li M, Weiss BL, Zhao H, Aksoy S, Caccone A:  
1368 **Uncovering Genomic Regions Associated with *Trypanosoma* Infections in Wild**  
1369 **Populations of the Tsetse Fly *Glossina fuscipes*.** *G3: Genes/Genomes/Genetics*  
1370 2018.
- 1371 75. Meier R, Kotrba M, Ferrar P: **Ovoviviparity and viviparity in the Diptera.** *Biological Reviews of*  
1372 *the Cambridge Philosophical Society* 1999, **74**:199-258.
- 1373 76. Cmelik SHW, Bursell E, Slack E: **Composition of Gut Contents of Third-Instar Tsetse Larvae**  
1374 **(*Glossina Morsitans* Westwood).** *Comparative Biochemistry and Physiology* 1969, **29**:447-&.
- 1375 77. Benoit JB, Attardo GM, Michalkova V, Krause TB, Bohova J, Zhang Q, Baumann AA, Mireji PO,  
1376 Takac P, Denlinger DL, et al: **A Novel Highly Divergent Protein Family Identified from a**  
1377 **Viviparous Insect by RNA-seq Analysis: A Potential Target for Tsetse Fly-Specific**  
1378 **Abortifacients.** *PLoS Genetics* 2014, **10**:e1003874.
- 1379 78. Benoit JB, Attardo GM, Michalkova V, Takac P, Bohova J, Aksoy S: **Sphingomyelinase activity in**  
1380 **mother's milk is essential for juvenile development: a case from lactating tsetse flies.** *Biology*  
1381 *of Reproduction* 2012, **87 (17)** 1-10.
- 1382 79. Guz N, Attardo GM, Wu Y, Aksoy S: **Molecular aspects of transferrin expression in the tsetse fly**  
1383 **(*Glossina morsitans morsitans*).** *Journal of Insect Physiology* 2007, **53**:715-723.

- 1384 80. Scolari F, Benoit JB, Michalkova V, Aksoy E, Takac P, Abd-Alla AM, Malacrida AR, Aksoy S,  
1385 Attardo GM: **The Spermatophore in *Glossina morsitans morsitans*: Insights into Male**  
1386 **Contributions to Reproduction.** *Sci Rep* 2016, **6**:20334.
- 1387 81. Neafsey DE, Waterhouse RM, Abai MR, Aganezov SS, Alekseyev MA, Allen JE, Amon J, Arca B,  
1388 Arensburger P, Artemov G, et al: **Mosquito genomics. Highly evolvable malaria vectors: the**  
1389 **genomes of 16 *Anopheles* mosquitoes.** *Science* 2015, **347**:1258522.
- 1390 82. Wong A, Turchin MC, Wolfner MF, Aquadro CF: **Evidence for positive selection on *Drosophila***  
1391 ***melanogaster* seminal fluid protease homologs.** *Mol Biol Evol* 2008, **25**:497-506.
- 1392 83. Findlay GD, MacCoss MJ, Swanson WJ: **Proteomic discovery of previously unannotated, rapidly**  
1393 **evolving seminal fluid genes in *Drosophila*.** *Genome Res* 2009, **19**:886-896.
- 1394 84. Macharia R, Mireji P, Murungi E, Murilla G, Christoffels A, Aksoy S, Masiga D: **Genome-Wide**  
1395 **Comparative Analysis of Chemosensory Gene Families in Five Tsetse Fly Species.** *PLoS Negl*  
1396 *Trop Dis* 2016, **10**:e0004421.
- 1397 85. Obiero GFO, Mireji PO, Nyanjom SRG, Christoffels A, Robertson HM, Masiga DK: **Odorant and**  
1398 **gustatory receptors in the tsetse fly *Glossina morsitans morsitans*.** *PLoS Neglected Tropical*  
1399 *Diseases* 2014, **8**:e2663.
- 1400 86. Liu R, Lehane S, He X, Lehane M, Hertz-Fowler C, Berriman M, Pickett JA, Field LM, Zhou JJ:  
1401 **Characterisations of odorant-binding proteins in the tsetse fly *Glossina morsitans morsitans*.**  
1402 *Cellular and Molecular Life Sciences* 2010, **67**:919-929.
- 1403 87. Rio RV, Symula RE, Wang J, Lohs C, Wu YN, Snyder AK, Bjornson RD, Oshima K, Biehl BS, Perna  
1404 NT, et al: **Insight into the transmission biology and species-specific functional capabilities of**  
1405 **tsetse (Diptera: Glossinidae) obligate symbiont *Wigglesworthia*.** *mBio* 2012, **3**.
- 1406 88. Caljon G, Van Reet N, De Trez C, Vermeersch M, Perez-Morga D, Van Den Abbeele J: **The Dermis**  
1407 **as a Delivery Site of *Trypanosoma brucei* for Tsetse Flies.** *PLoS Pathog* 2016, **12**:e1005744.
- 1408 89. Caljon G, Van Den Abbeele J, Stijlemans B, Coosemans M, De Baetselier P, Magez S: **Tsetse fly**  
1409 **saliva accelerates the onset of *Trypanosoma brucei* infection in a mouse model associated**  
1410 **with a reduced host inflammatory response.** *Infect Immun* 2006, **74**:6324-6330.
- 1411 90. Zhao X, Silva TL, Cronin L, Savage AF, O'Neill M, Nerima B, Okedi LM, Aksoy S: **Immunogenicity**  
1412 **and Serological Cross-Reactivity of Saliva Proteins among Different Tsetse Species.** *PLoS Negl*  
1413 *Trop Dis* 2015, **9**:e0004038.
- 1414 91. Dama E, Cornelle S, Bienvenu Somda M, Camara M, Kambire R, Courtin F, Jamonneau V,  
1415 Demetree E, Seveno M, Bengaly Z, et al: **Identification of *Glossina palpalis gambiensis* specific**  
1416 **salivary antigens: towards the development of a serologic biomarker of human exposure to**  
1417 **tsetse flies in West Africa.** *Microbes Infect* 2013, **15**:416-427.
- 1418 92. Van Den Abbeele J, Caljon G, Dierick JF, Moens L, De Ridder K, Coosemans M: **The *Glossina***  
1419 ***morsitans* tsetse fly saliva: general characteristics and identification of novel salivary proteins.**  
1420 *Insect Biochemistry and Molecular Biology* 2007, **37**:1075-1085.
- 1421 93. Lindh JM, Goswami P, Blackburn RS, Arnold SE, Vale GA, Lehane MJ, Torr SJ: **Optimizing the**  
1422 **colour and fabric of targets for the control of the tsetse fly *Glossina fuscipes fuscipes*.** *PLoS*  
1423 *Negl Trop Dis* 2012, **6**:e1661.
- 1424 94. Green CH, Cosens D: **Spectral responses of the tsetse fly, *Glossina morsitans morsitans*.** *Journal*  
1425 *of Insect Physiology* 1983, **29**:795-800.
- 1426 95. Gnerre S, MacCallum I, Przybylski D, Ribeiro FJ, Burton JN, Walker BJ, Sharpe T, Hall G, Shea TP,  
1427 Sykes S, et al: **High-quality draft assemblies of mammalian genomes from massively parallel**  
1428 **sequence data.** *Proceedings of the National Academy of Sciences* 2011, **108**:1513-1518.
- 1429 96. Tsai IJ, Otto TD, Berriman M: **Improving draft assemblies by iterative mapping and assembly of**  
1430 **short reads to eliminate gaps.** *Genome Biol* 2010, **11**:R41.

- 1431 97. Weller GL, Foster GG: **Genetic maps of the sheep blowfly *Lucilia cuprina*: linkage-group**  
1432 **correlations with other dipteran genera.** *Genome* 1993, **36**:495-506.
- 1433 98. Foster TJ, Davis MA, Roberts DE, Takeshita K, Kleckner N: **Genetic organization of transposon**  
1434 **Tn10.** *Cell* 1981, **23**:201-213.
- 1435 99. Zdobnov EM, Tegenfeldt F, Kuznetsov D, Waterhouse RM, Simao FA, Ioannidis P, Seppey M,  
1436 Loetscher A, Kriventseva EV: **OrthoDB v9.1: cataloging evolutionary and functional annotations**  
1437 **for animal, fungal, plant, archaeal, bacterial and viral orthologs.** *Nucleic Acids Res* 2017,  
1438 **45**:D744-D749.
- 1439 100. Smit A, Hubley R: **RepeatModeler Open-1.0.**; 2008-2015
- 1440 101. Smit A, Hubley R, Green P: **RepeatMasker Open-3.0.**; 1996-2010.
- 1441 102. Benson G: **Tandem repeats finder: a program to analyze DNA sequences.** *Nucleic Acids Res*  
1442 1999, **27**:573-580.
- 1443 103. Morgulis A, Gertz EM, Schaffer AA, Agarwala R: **A fast and symmetric DUST implementation to**  
1444 **mask low-complexity DNA sequences.** *J Comput Biol* 2006, **13**:1028-1040.
- 1445 104. Cantarel BL, Korf I, Robb SM, Parra G, Ross E, Moore B, Holt C, Sanchez Alvarado A, Yandell M:  
1446 **MAKER: an easy-to-use annotation pipeline designed for emerging model organism genomes.**  
1447 *Genome Res* 2008, **18**:188-196.
- 1448 105. Waterhouse RM, Seppey M, Simao FA, Manni M, Ioannidis P, Klioutchnikov G, Kriventseva EV,  
1449 Zdobnov EM: **BUSCO applications from quality assessments to gene prediction and**  
1450 **phylogenomics.** *Mol Biol Evol* 2017.
- 1451 106. Parra G, Bradnam K, Korf I: **CEGMA: a pipeline to accurately annotate core genes in eukaryotic**  
1452 **genomes.** *Bioinformatics* 2007, **23**:1061-1067.
- 1453 107. Birney E, Clamp M, Durbin R: **GeneWise and Genomewise.** *Genome Res* 2004, **14**:988-995.
- 1454 108. Trapnell C, Pachter L, Salzberg SL: **TopHat: discovering splice junctions with RNA-Seq.**  
1455 *Bioinformatics* 2009, **25**:1105-1111.
- 1456 109. Trapnell C, Roberts A, Goff L, Pertea G, Kim D, Kelley DR, Pimentel H, Salzberg SL, Rinn JL,  
1457 Pachter L: **Differential gene and transcript expression analysis of RNA-seq experiments with**  
1458 **TopHat and Cufflinks.** *Nat Protoc* 2012, **7**:562-578.
- 1459 110. Jones P, Binns D, Chang HY, Fraser M, Li W, McAnulla C, McWilliam H, Maslen J, Mitchell A, Nuka  
1460 G, et al: **InterProScan 5: genome-scale protein function classification.** *Bioinformatics* 2014,  
1461 **30**:1236-1240.
- 1462 111. Li L, Stoeckert CJ, Jr., Roos DS: **OrthoMCL: identification of ortholog groups for eukaryotic**  
1463 **genomes.** *Genome Res* 2003, **13**:2178-2189.
- 1464 112. Yandell M, Ence D: **A beginner's guide to eukaryotic genome annotation.** *Nat Rev Genet* 2012,  
1465 **13**:329-342.
- 1466 113. Herrero J, Muffato M, Beal K, Fitzgerald S, Gordon L, Pignatelli M, Vilella AJ, Searle SMJ, Amode  
1467 R, Brent S, et al: **Ensembl comparative genomics resources.** *Database* 2016, **2016**:bav096-  
1468 bav096.
- 1469 114. Nawrocki EP, Burge SW, Bateman A, Daub J, Eberhardt RY, Eddy SR, Floden EW, Gardner PP,  
1470 Jones TA, Tate J, Finn RD: **Rfam 12.0: updates to the RNA families database.** *Nucleic Acids Res*  
1471 2015, **43**:D130-137.
- 1472 115. Camacho C, Coulouris G, Avagyan V, Ma N, Papadopoulos J, Bealer K, Madden TL: **BLAST+**  
1473 **architecture and applications.** *BMC bioinformatics* 2009, **10**:421.
- 1474 116. Nawrocki EP, Eddy SR: **Infernal 1.1: 100-fold faster RNA homology searches.** *Bioinformatics*  
1475 2013, **29**:2933-2935.
- 1476 117. Lagesen K, Hallin P, Rodland EA, Staerfeldt HH, Rognes T, Ussery DW: **RNAmmer: consistent and**  
1477 **rapid annotation of ribosomal RNA genes.** *Nucleic Acids Res* 2007, **35**:3100-3108.



- 1478 118. Lowe TM, Eddy SR: **tRNAscan-SE: a program for improved detection of transfer RNA genes in**  
1479 **genomic sequence.** *Nucleic Acids Res* 1997, **25**:955-964.
- 1480 119. Lee E, Helt GA, Reese JT, Munoz-Torres MC, Childers CP, Buels RM, Stein L, Holmes IH, Elisk CG,  
1481 Lewis SE: **Web Apollo: a web-based genomic annotation editing platform.** *Genome Biol* 2013,  
1482 **14**:R93.
- 1483 120. Giraldo-Calderon GI, Emrich SJ, MacCallum RM, Maslen G, Dialynas E, Topalis P, Ho N, Gesing S,  
1484 VectorBase C, Madey G, et al: **VectorBase: an updated bioinformatics resource for invertebrate**  
1485 **vectors and other organisms related with human diseases.** *Nucleic Acids Res* 2015, **43**:D707-  
1486 713.
- 1487 121. Chevreux B, Pfisterer T, Drescher B, Driesel AJ, Muller WE, Wetter T, Suhai S: **Using the miraEST**  
1488 **assembler for reliable and automated mRNA transcript assembly and SNP detection in**  
1489 **sequenced ESTs.** *Genome Res* 2004, **14**:1147-1159.
- 1490 122. Sedlazeck FJ, Rescheneder P, von Haeseler A: **NextGenMap: fast and accurate read mapping in**  
1491 **highly polymorphic genomes.** *Bioinformatics* 2013, **29**:2790-2791.
- 1492 123. Herrero J, Muffato M, Beal K, Fitzgerald S, Gordon L, Pignatelli M, Vilella AJ, Searle SM, Amode R,  
1493 Brent S, et al: **Ensembl comparative genomics resources.** *Database (Oxford)* 2016, **2016**.
- 1494 124. Harris R: **Improved pairwise alignment of genomic DNA.** The Pennsylvania State University,  
1495 College of Engineering; 2007.
- 1496 125. Kent WJ, Baertsch R, Hinrichs A, Miller W, Haussler D: **Evolution's cauldron: duplication,**  
1497 **deletion, and rearrangement in the mouse and human genomes.** *Proc Natl Acad Sci U S A* 2003,  
1498 **100**:11484-11489.
- 1499 126. Katoh K, Standley DM: **MAFFT multiple sequence alignment software version 7: improvements**  
1500 **in performance and usability.** *Mol Biol Evol* 2013, **30**:772-780.
- 1501 127. Castresana J: **Selection of conserved blocks from multiple alignments for their use in**  
1502 **phylogenetic analysis.** *Mol Biol Evol* 2000, **17**:540-552.
- 1503 128. Stamatakis A: **RAxML version 8: a tool for phylogenetic analysis and post-analysis of large**  
1504 **phylogenies.** *Bioinformatics* 2014, **30**:1312-1313.
- 1505 129. Lartillot N, Philippe H: **A Bayesian mixture model for across-site heterogeneities in the amino-**  
1506 **acid replacement process.** *Mol Biol Evol* 2004, **21**:1095-1109.
- 1507 130. Lartillot N, Brinkmann H, Philippe H: **Suppression of long-branch attraction artefacts in the**  
1508 **animal phylogeny using a site-heterogeneous model.** *BMC Evol Biol* 2007, **7 Suppl 1**:S4.
- 1509 131. Chandonia JM, Hon G, Walker NS, Lo Conte L, Koehl P, Levitt M, Brenner SE: **The ASTRAL**  
1510 **Compendium in 2004.** *Nucleic Acids Res* 2004, **32**:D189-192.
- 1511 132. Tamura K, Stecher G, Peterson D, Filipinski A, Kumar S: **MEGA6: Molecular Evolutionary Genetics**  
1512 **Analysis version 6.0.** *Mol Biol Evol* 2013, **30**:2725-2729.
- 1513 133. Kuhn RM, Haussler D, Kent WJ: **The UCSC genome browser and associated tools.** *Brief*  
1514 *Bioinform* 2013, **14**:144-161.
- 1515 134. Blanchette M, Kent WJ, Riemer C, Elnitski L, Smit AF, Roskin KM, Baertsch R, Rosenbloom K,  
1516 Clawson H, Green ED, et al: **Aligning multiple genomic sequences with the threaded blockset**  
1517 **aligner.** *Genome Res* 2004, **14**:708-715.
- 1518 135. Donthu R, Lewin HA, Larkin DM: **SytenyTracker: a tool for defining homologous syteny**  
1519 **blocks using radiation hybrid maps and whole-genome sequence.** *BMC Res Notes* 2009, **2**:148.
- 1520 136. Krzywinski M, Schein J, Birol I, Connors J, Gascoyne R, Horsman D, Jones SJ, Marra MA: **Circos:**  
1521 **an information aesthetic for comparative genomics.** *Genome Res* 2009, **19**:1639-1645.
- 1522 137. Vilella AJ, Severin J, Ureta-Vidal A, Heng L, Durbin R, Birney E: **EnsemblCompara GeneTrees:**  
1523 **Complete, duplication-aware phylogenetic trees in vertebrates.** *Genome Res* 2009, **19**:327-335.
- 1524 138. De Bie T, Cristianini N, Demuth JP, Hahn MW: **CAFE: a computational tool for the study of gene**  
1525 **family evolution.** *Bioinformatics* 2006, **22**:1269-1271.

- 1526 139. Rosendale AJ, Romick-Rosendale LE, Watanabe M, Dunlevy ME, Benoit JB: **Mechanistic**  
1527 **underpinnings of dehydration stress in ticks revealed through RNA-seq and metabolomics.**  
1528 *Journal of Experimental Biology* 2016, **Submitted**. .
- 1529 140. Scolari F, Benoit JB, Michalkova V, Aksoy E, Takac P, Abd-Alla AM, Malacrida AR, Aksoy S,  
1530 Attardo GM: **The Spermatophore in Glossina morsitans morsitans: Insights into Male**  
1531 **Contributions to Reproduction.** *Scientific reports* 2016, **6**.
- 1532 141. Baggerly KA, Deng L, Morris JS, Aldaz CM: **Differential expression in SAGE: accounting for**  
1533 **normal between-library variation.** *Bioinformatics* 2003, **19**:1477-1483.
- 1534 142. Initiative IGG: **Genome sequence of the tsetse fly (Glossina morsitans): vector of African**  
1535 **trypanosomiasis.** *Science* 2014 **Submitted**. .
- 1536 143. Pond SLK, Frost SDW: **Datamonkey: rapid detection of selective pressure on individual sites of**  
1537 **codon alignments.** *Bioinformatics* 2005, **21**:2531-2533.
- 1538 144. Delpont W, Poon AFY, Frost SDW, Pond SLK: **Datamonkey 2010: a suite of phylogenetic analysis**  
1539 **tools for evolutionary biology.** *Bioinformatics* 2010, **26**:2455-2457.
- 1540 145. Tamura K, Peterson D, Peterson N, Stecher G, Nei M, Kumar S: **MEGA5: molecular evolutionary**  
1541 **genetics analysis using maximum likelihood, evolutionary distance, and maximum parsimony**  
1542 **methods.** *Mol Biol Evol* 2011, **28**:2731-2739.
- 1543 146. Willis JH: **Structural cuticular proteins from arthropods: annotation, nomenclature, and**  
1544 **sequence characteristics in the genomics era.** *Insect Biochem Mol Biol* 2010, **40**:189-204.
- 1545 147. Ioannidou ZS, Theodoropoulou MC, Papandreou NC, Willis JH, Hamodrakas SJ: **CutProtFam-**  
1546 **Pred: detection and classification of putative structural cuticular proteins from sequence**  
1547 **alone, based on profile hidden Markov models.** *Insect Biochem Mol Biol* 2014, **52**:51-59.
- 1548 148. Weirauch MT, Yang A, Albu M, Cote AG, Montenegro-Montero A, Drewe P, Najafabadi HS,  
1549 Lambert SA, Mann I, Cook K, et al: **Determination and inference of eukaryotic transcription**  
1550 **factor sequence specificity.** *Cell* 2014, **158**:1431-1443.
- 1551 149. Finn RD, Mistry J, Tate J, Coggill P, Heger A, Pollington JE, Gavin OL, Gunasekaran P, Ceric G,  
1552 Forslund K, et al: **The Pfam protein families database.** *Nucleic Acids Res* 2010, **38**:D211-222.
- 1553 150. Weirauch MT, Hughes TR: **A catalogue of eukaryotic transcription factor types, their**  
1554 **evolutionary origin, and species distribution.** *Subcell Biochem* 2011, **52**:25-73.
- 1555 151. Eddy SR: **A new generation of homology search tools based on probabilistic inference.** *Genome*  
1556 *Inform* 2009, **23**:205-211.
- 1557 152. Sievers F, Wilm A, Dineen D, Gibson TJ, Karplus K, Li W, Lopez R, McWilliam H, Remmert M,  
1558 Soding J, et al: **Fast, scalable generation of high-quality protein multiple sequence alignments**  
1559 **using Clustal Omega.** *Mol Syst Biol* 2011, **7**:539.

1560

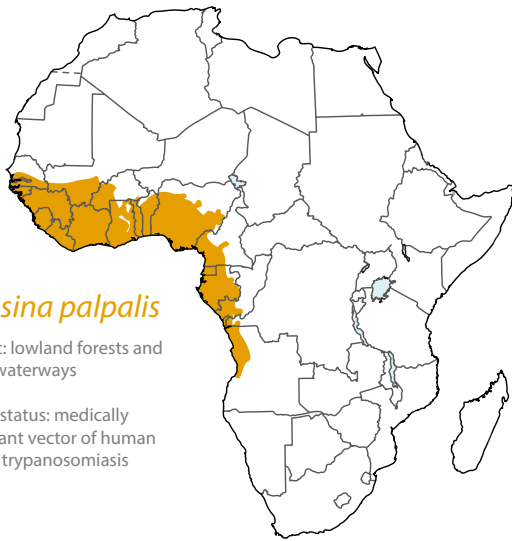

*Glossina palpalis*

Habitat: lowland forests and along waterways

Vector status: medically important vector of human african trypanosomiasis

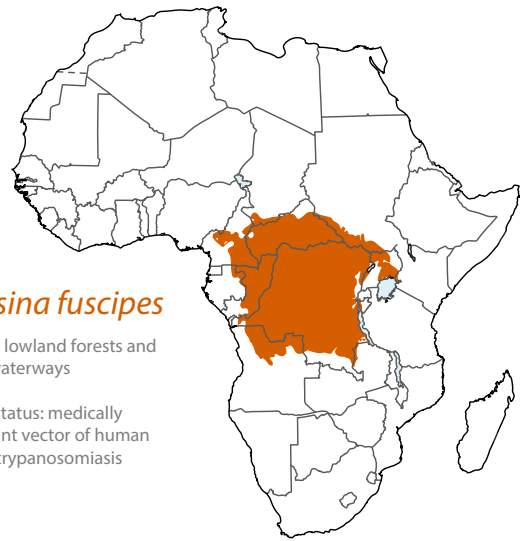

*Glossina fuscipes*

Habitat: lowland forests and along waterways

Vector status: medically important vector of human african trypanosomiasis

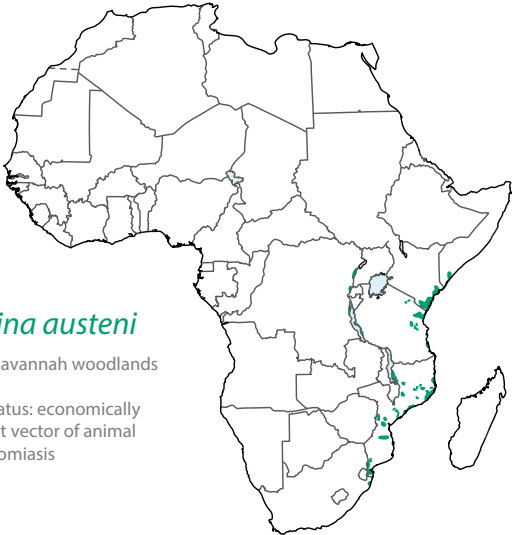

*Glossina austeni*

Habitat: savannah woodlands

Vector status: economically important vector of animal trypanosomiasis

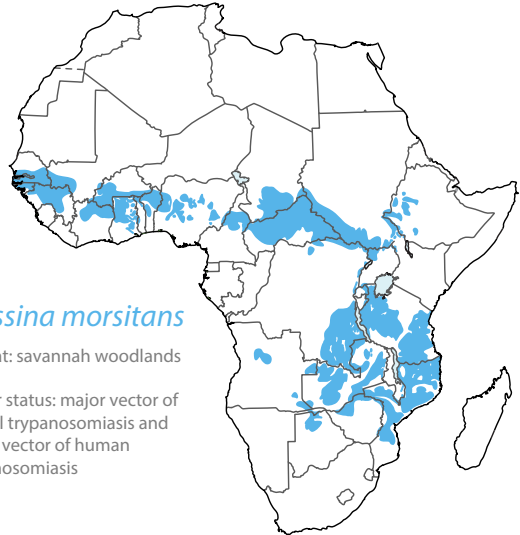

*Glossina morsitans*

Habitat: savannah woodlands

Vector status: major vector of animal trypanosomiasis and minor vector of human trypanosomiasis

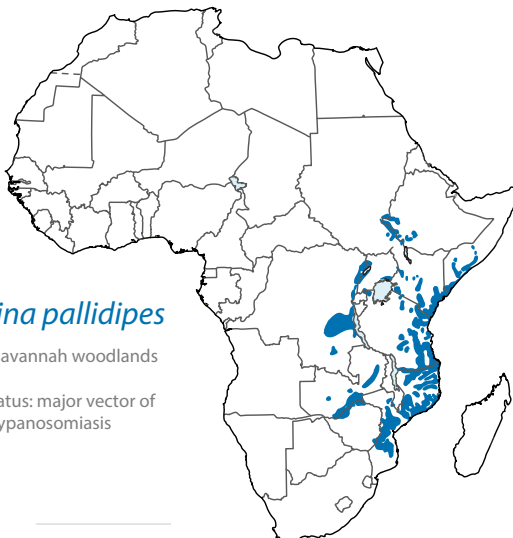

*Glossina pallidipes*

Habitat: savannah woodlands

Vector status: major vector of animal trypanosomiasis

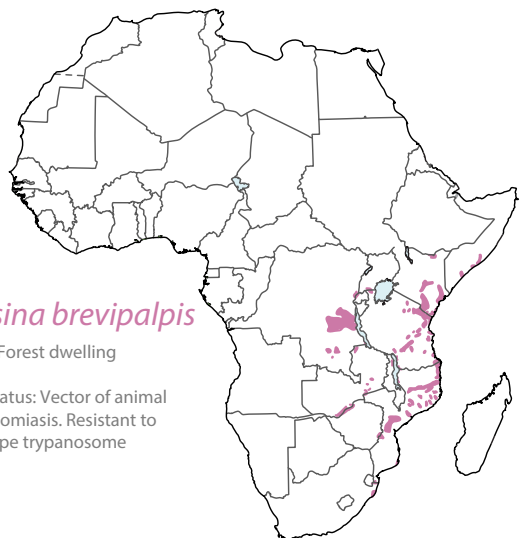

*Glossina brevipalpis*

Habitat: Forest dwelling

Vector status: Vector of animal trypanosomiasis. Resistant to Brucei type trypanosome infection

**A.** Genomic Alignment of *Glossina* Cluster Species Supercontigs (*Glossina morsitans* reference)

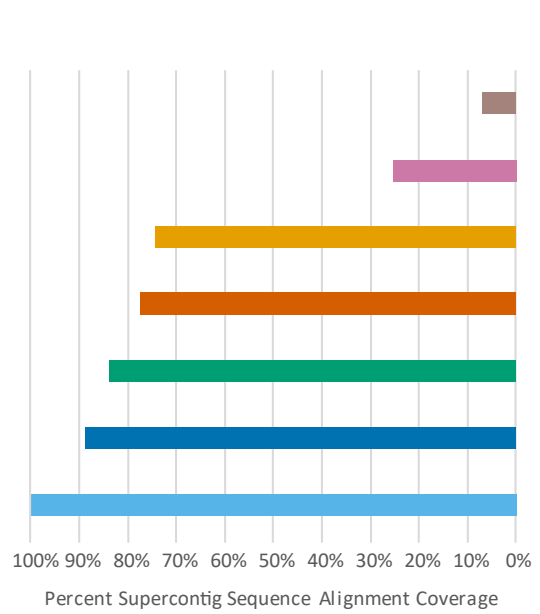

Alignment of Predicted Coding Sequences from the *Glossina* Cluster Species (*Glossina morsitans* reference)

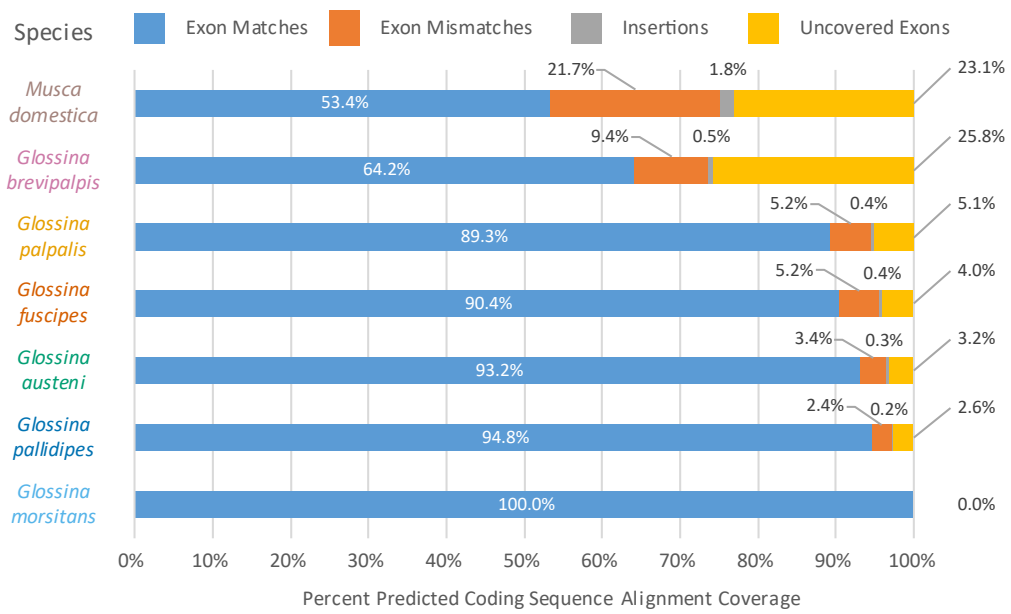

**B.**

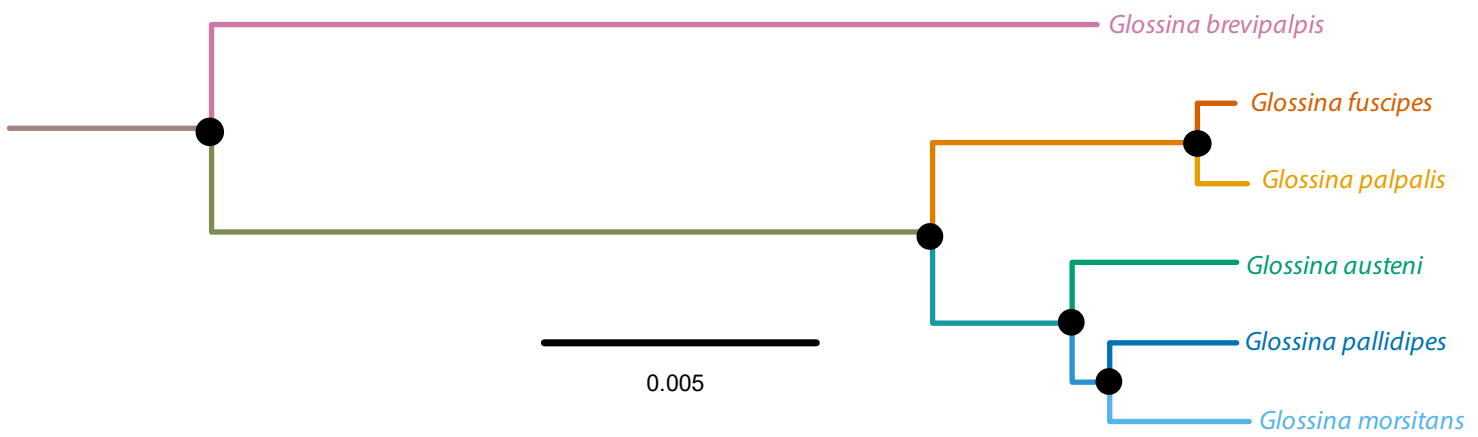

**C.**

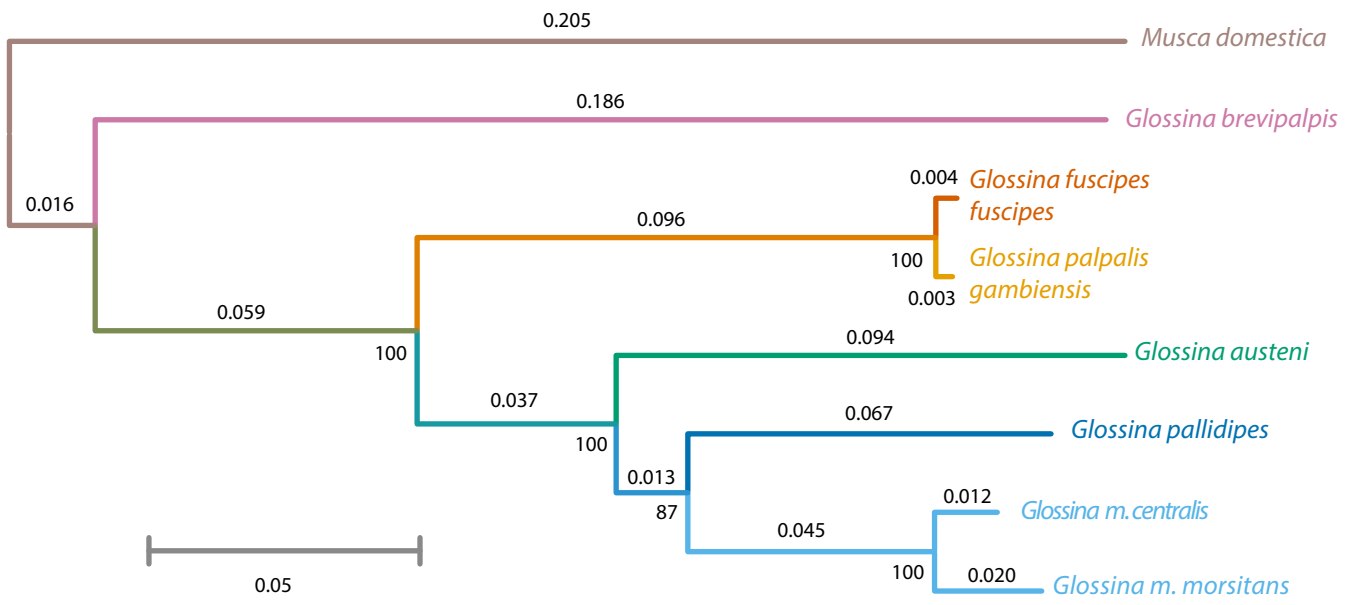

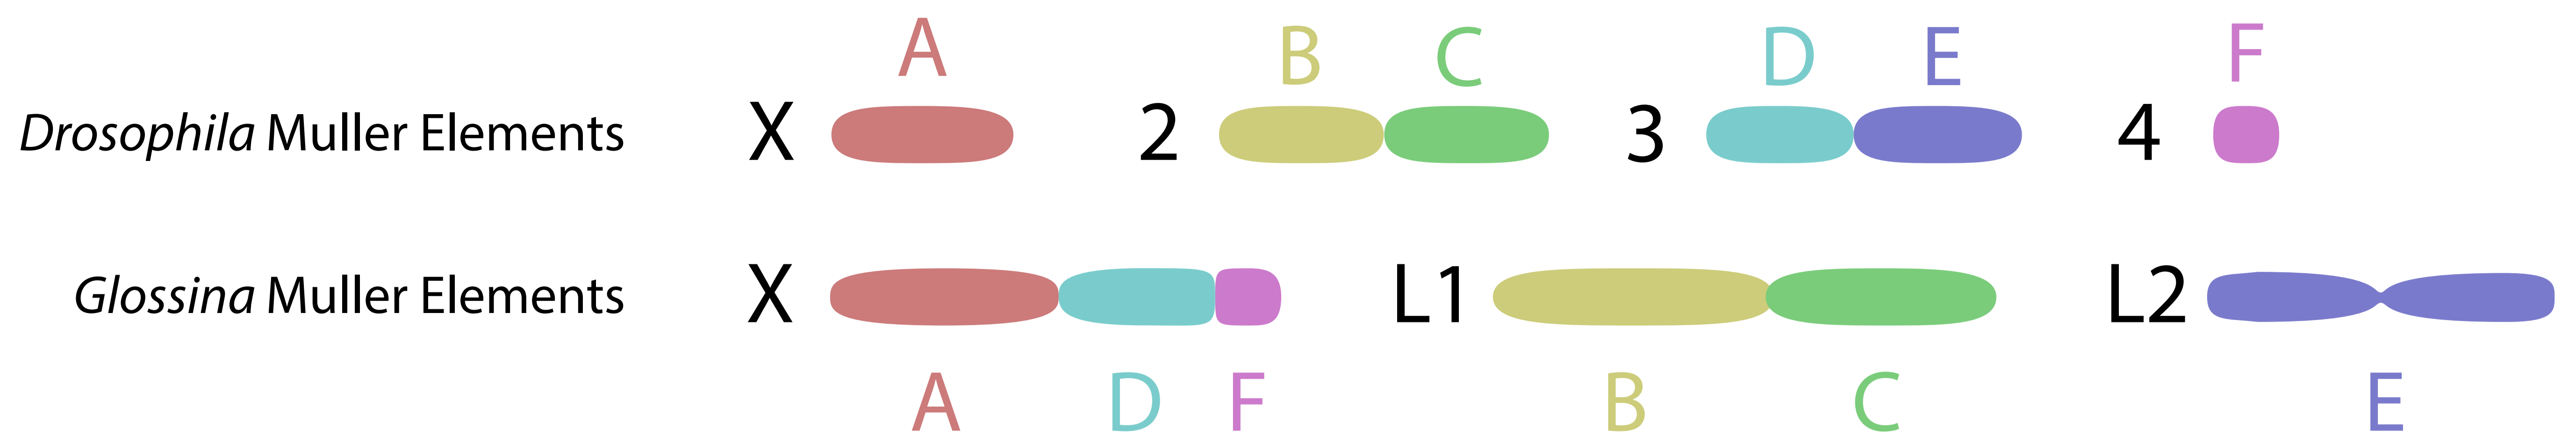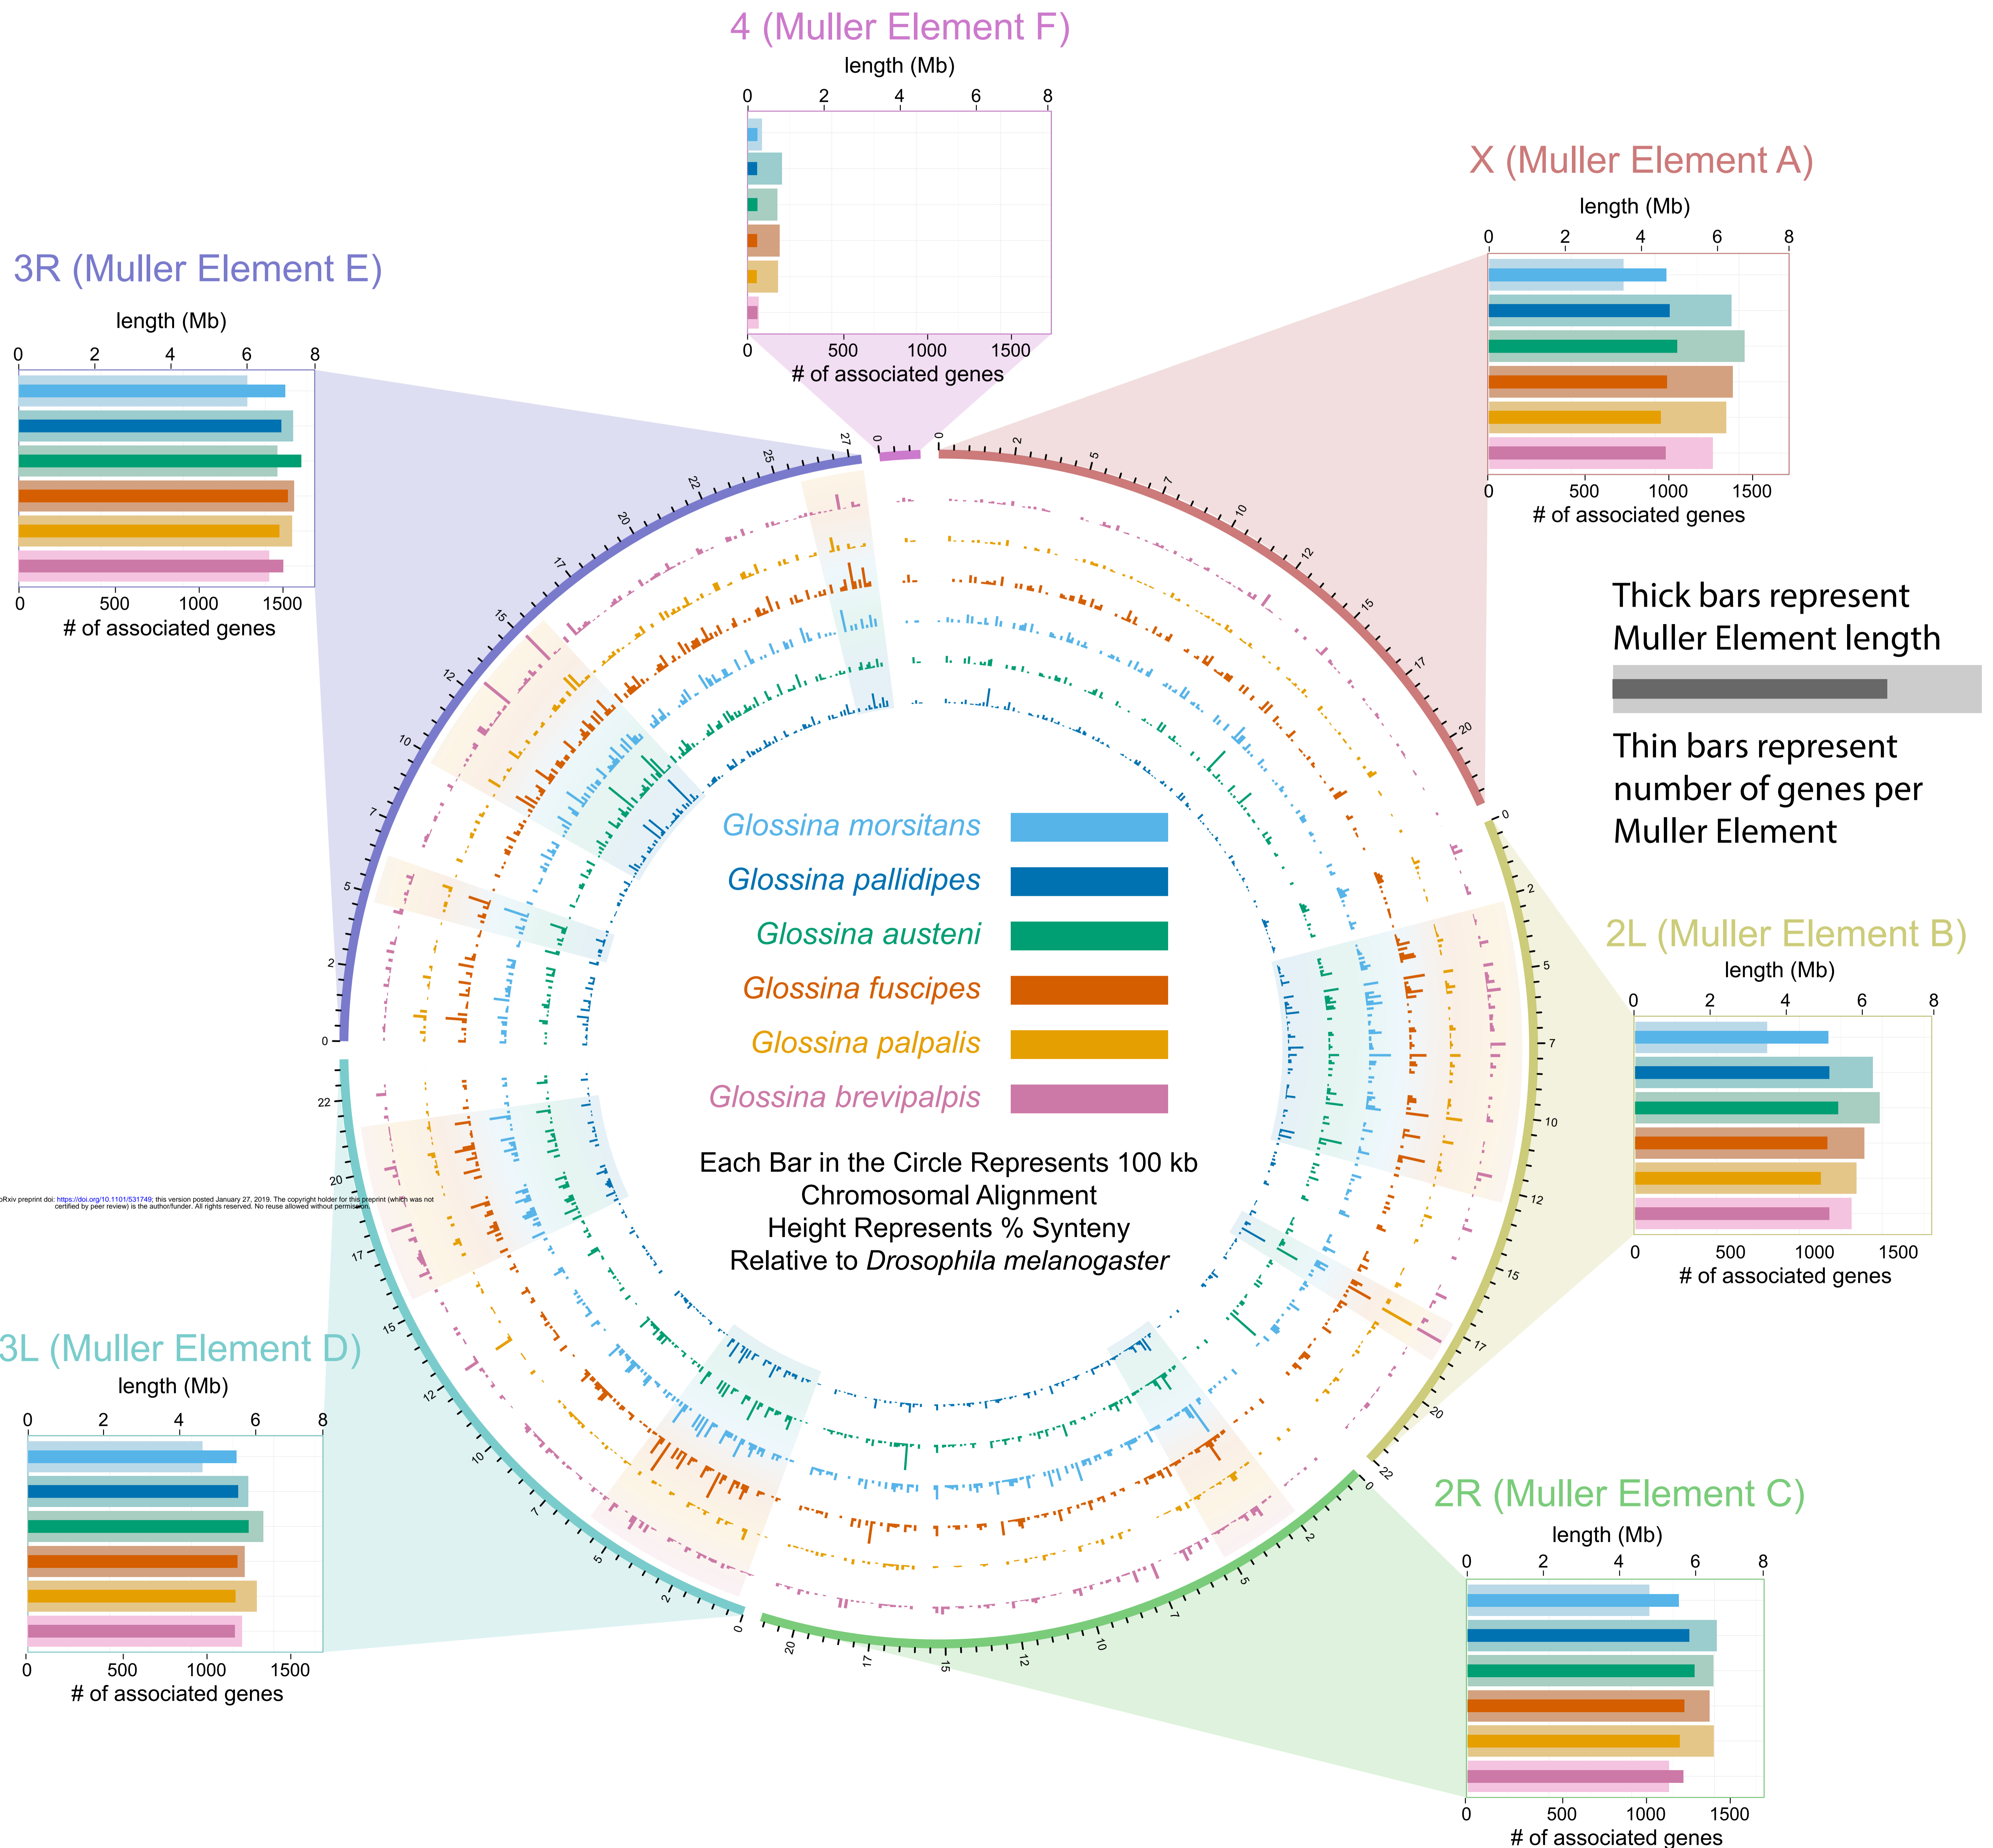

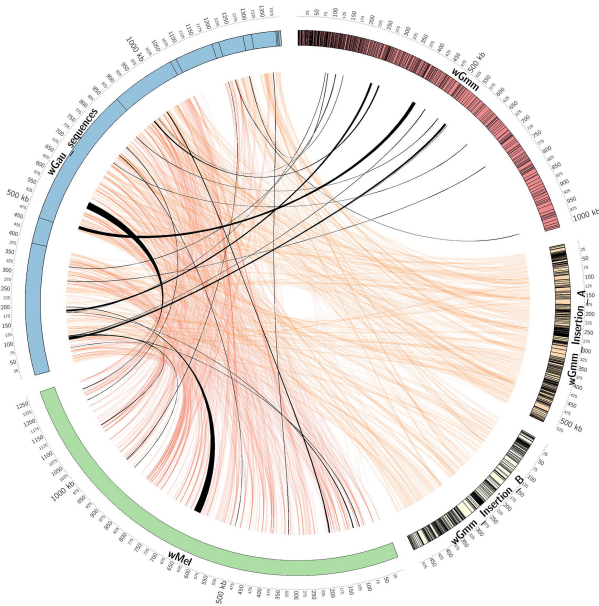

# Analysis of Glossina Gene Orthology Using the Ensembl Compara Dataset

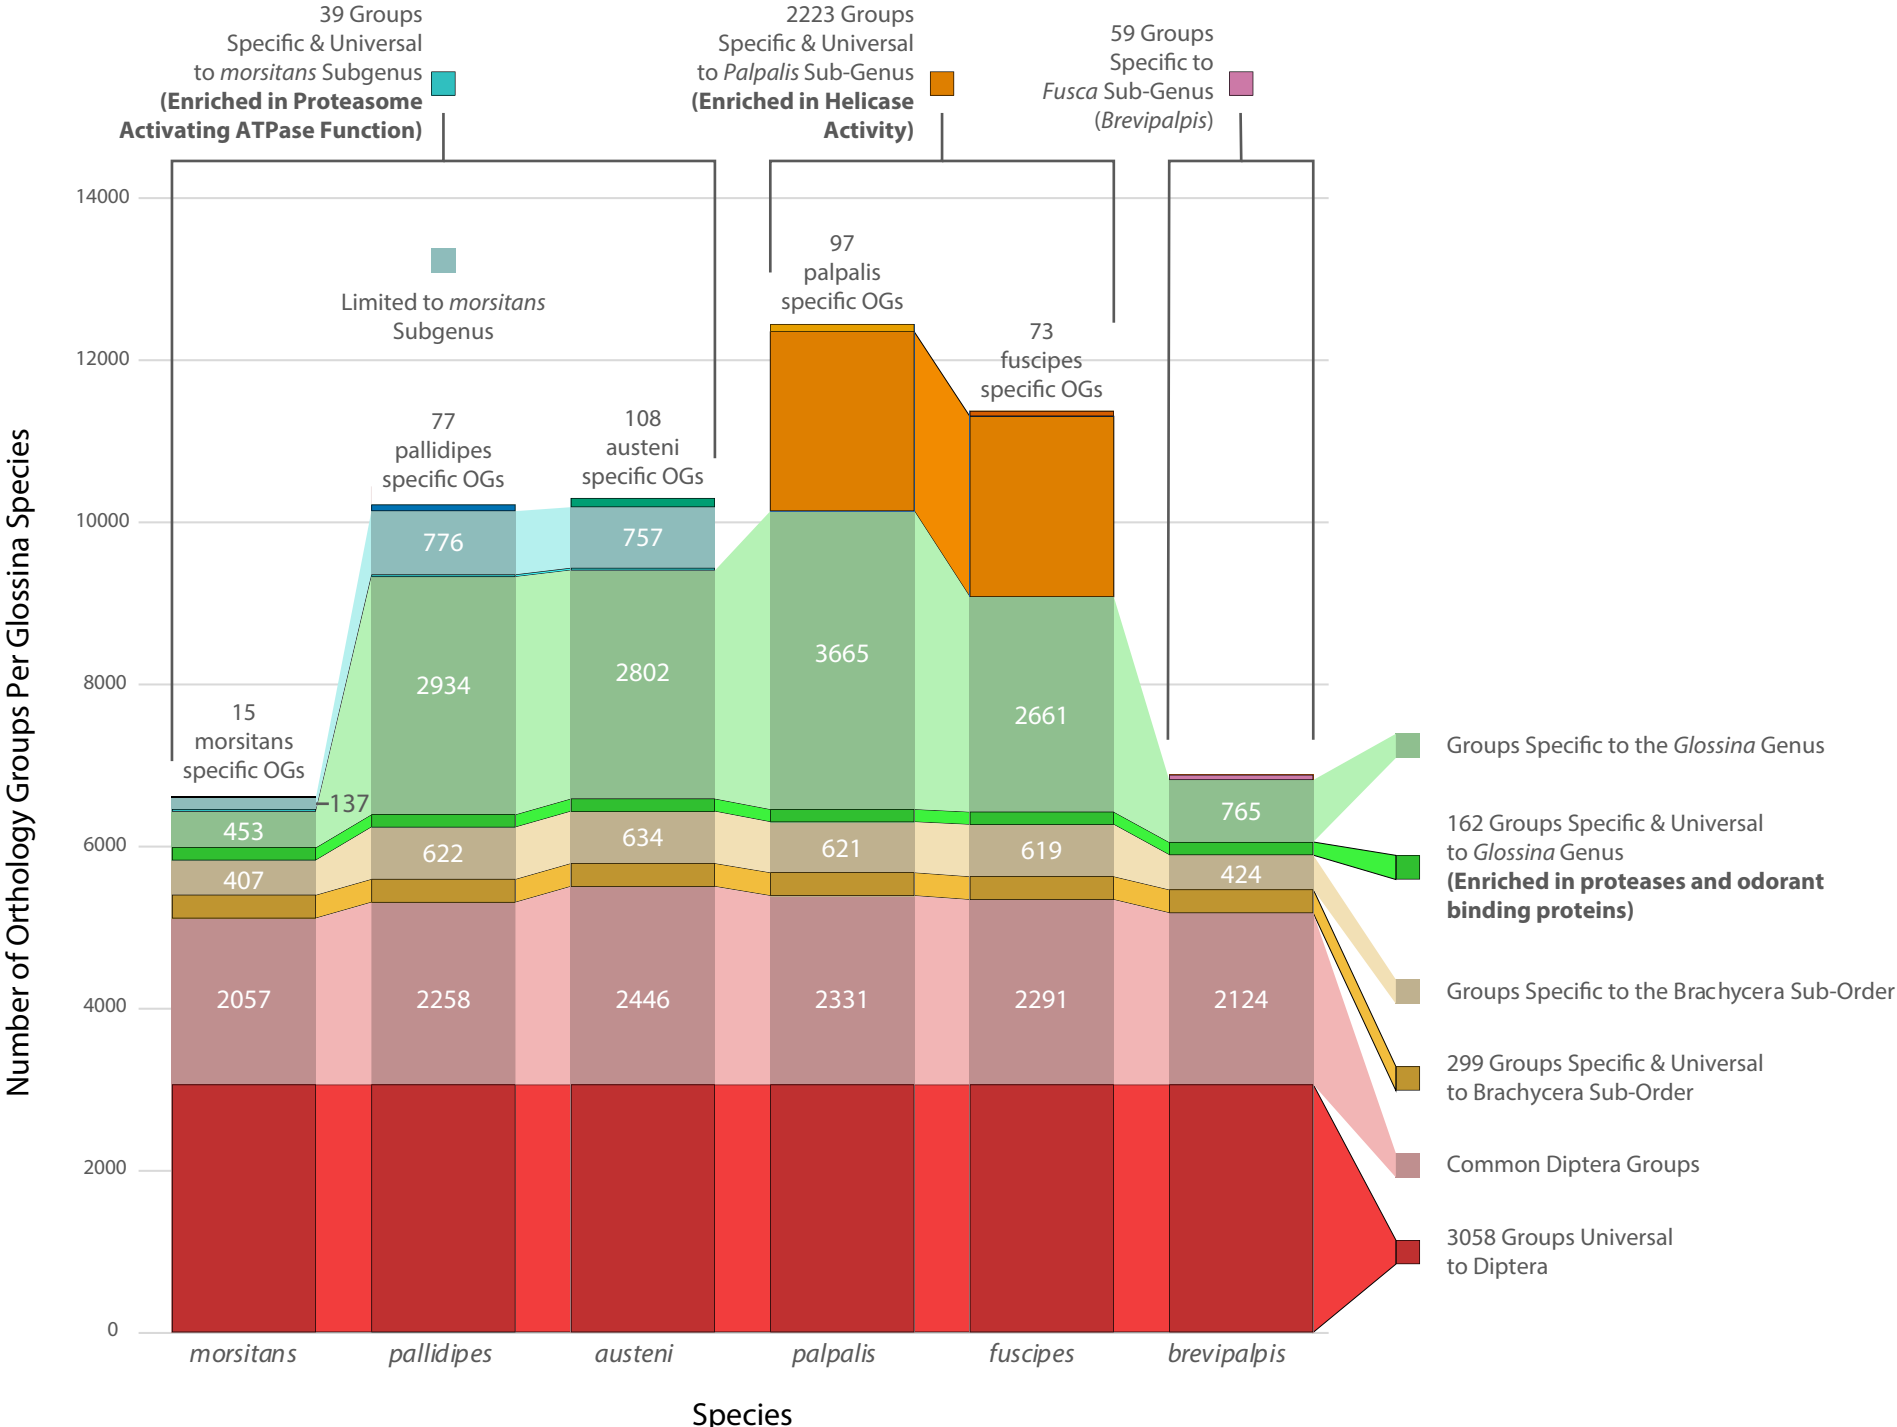

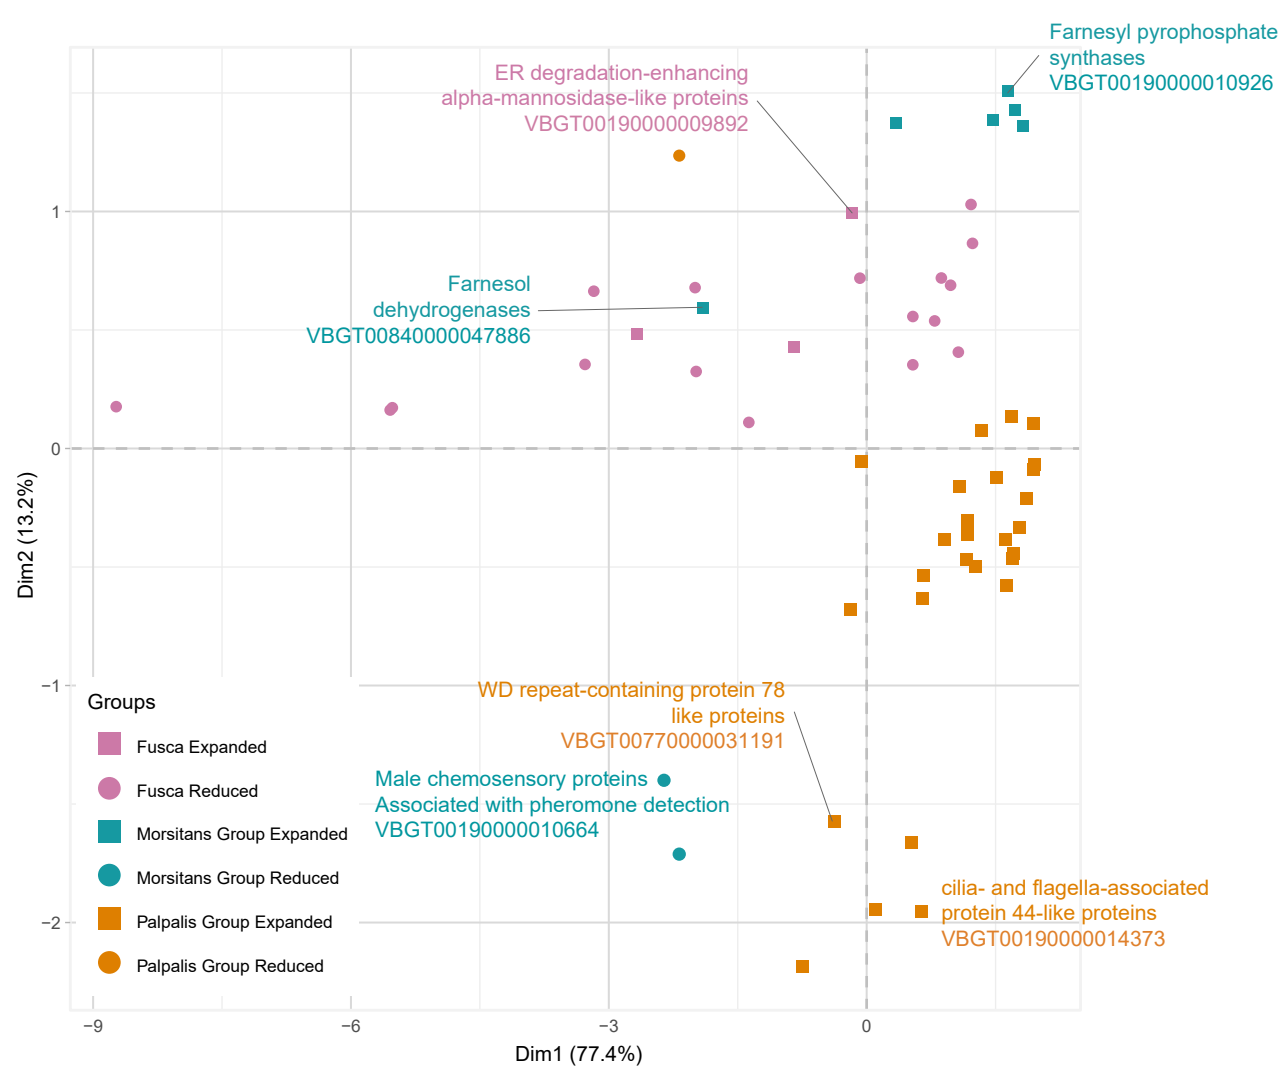



# Variable Immune Gene Families Between *Glossina* Species, *Musca domestica* and *Drosophila melanogaster*

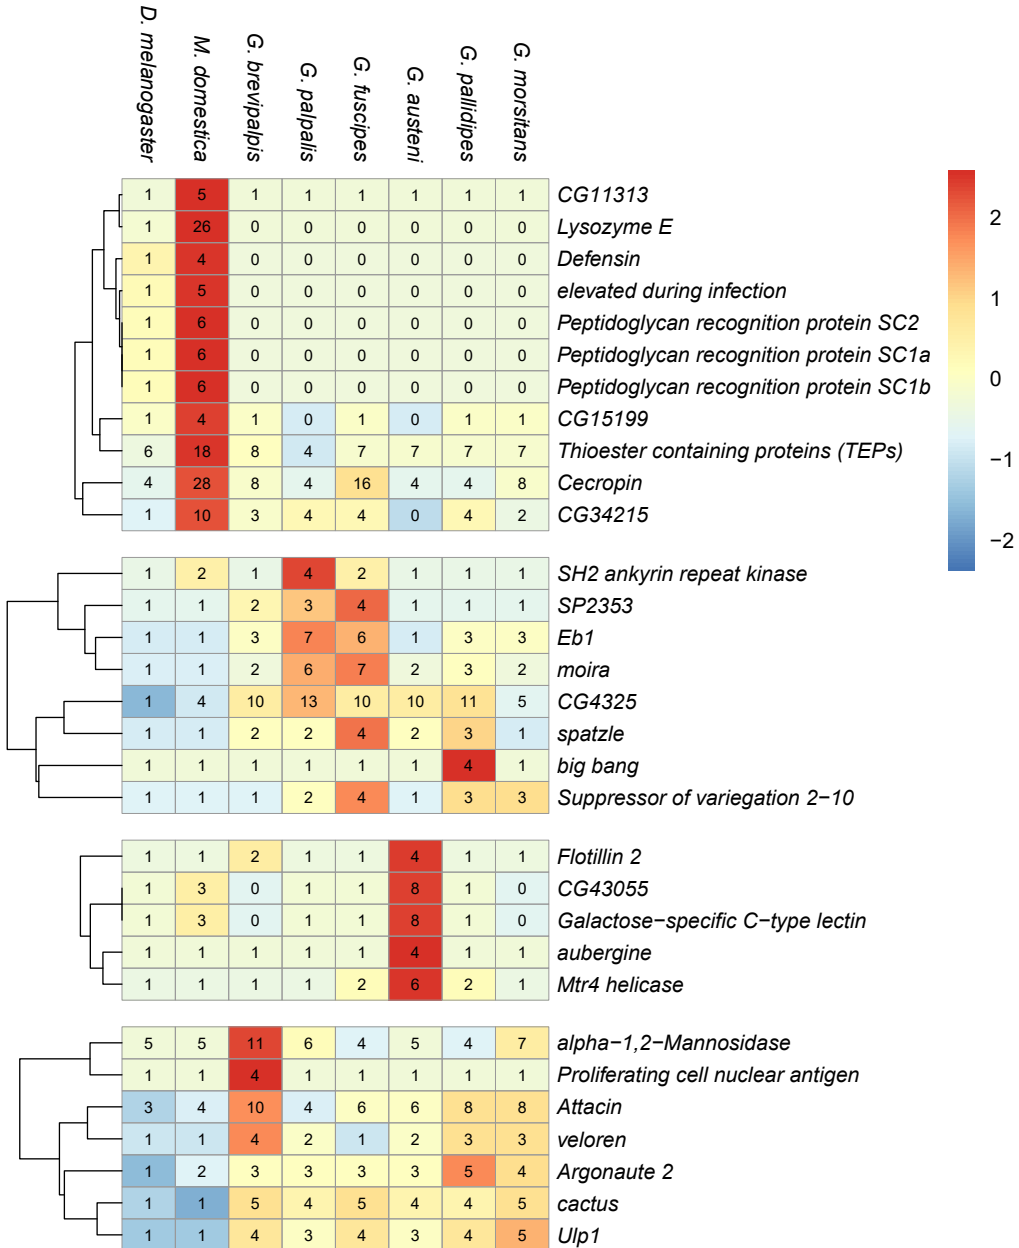

● *G. m. morsitans* ● *G. pallidipes* ● *G. austeni* ● *G. f. fuscipes* ● *G. p. gambiensi* ● *G. brevipalpis*

A

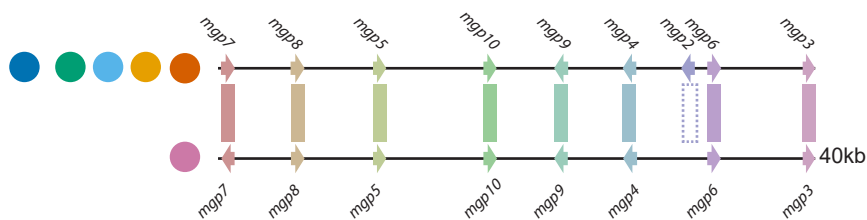

B

**Support:** ● 100-90 ● 89-80 ● 79-70 ● 69-60 ● 59-50

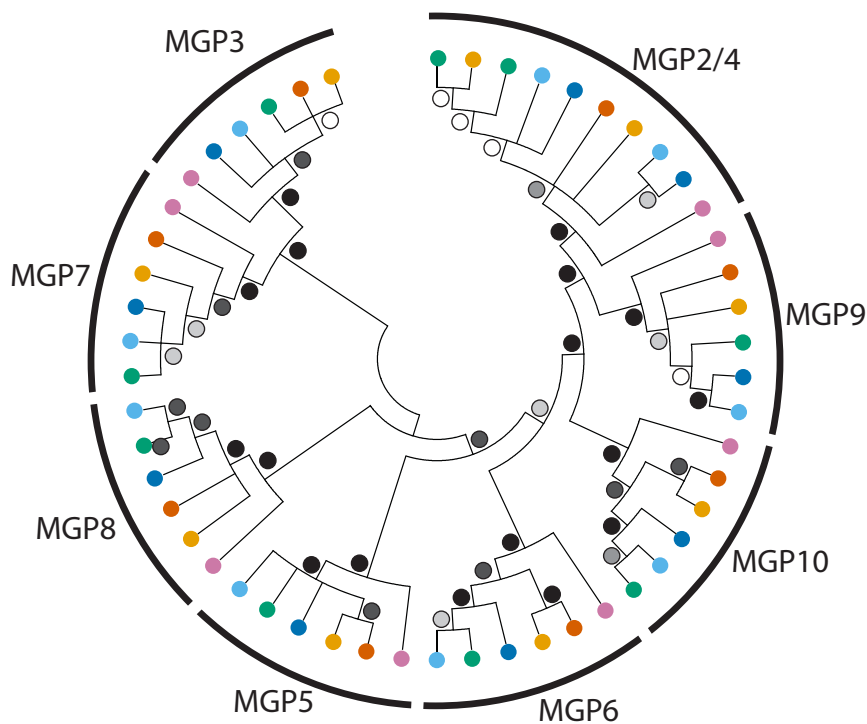

C

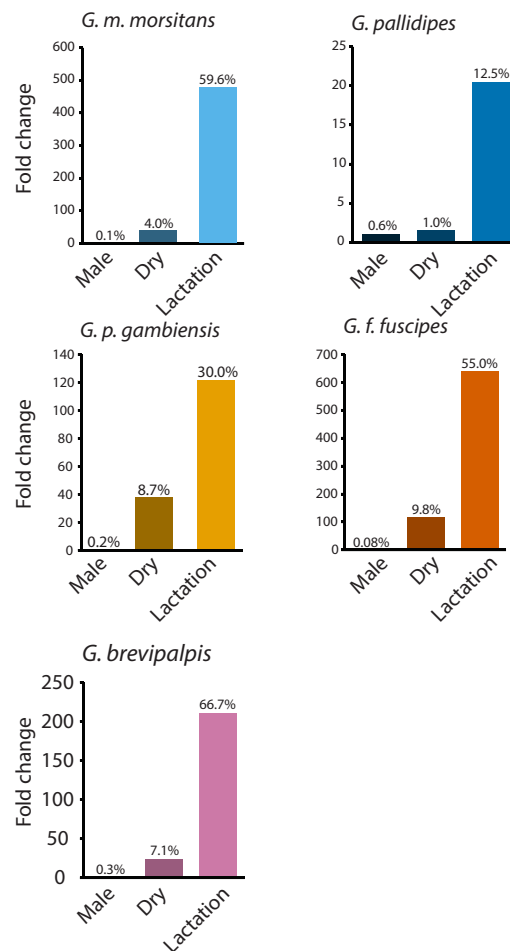

D

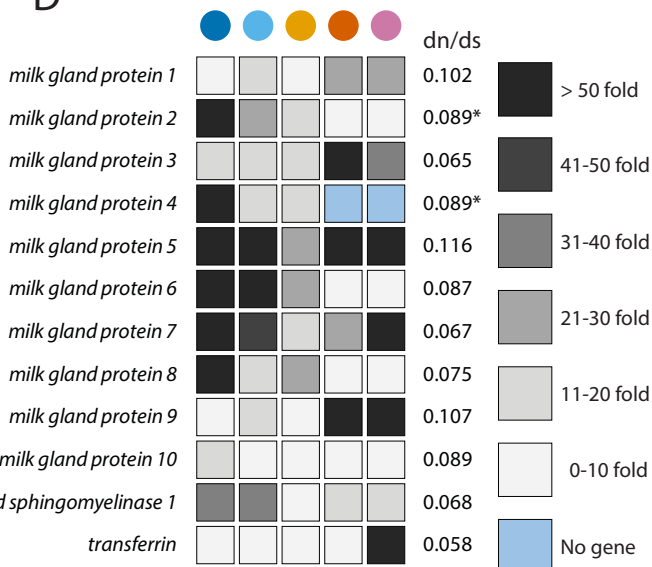

E

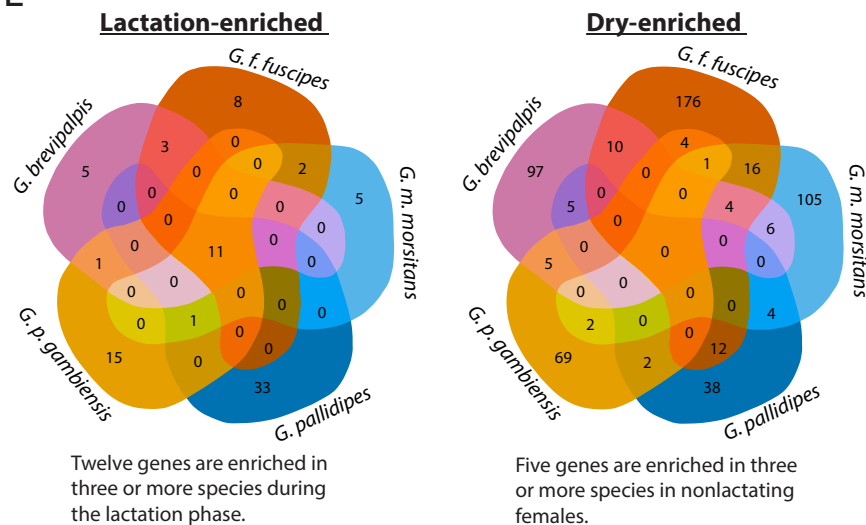

A.

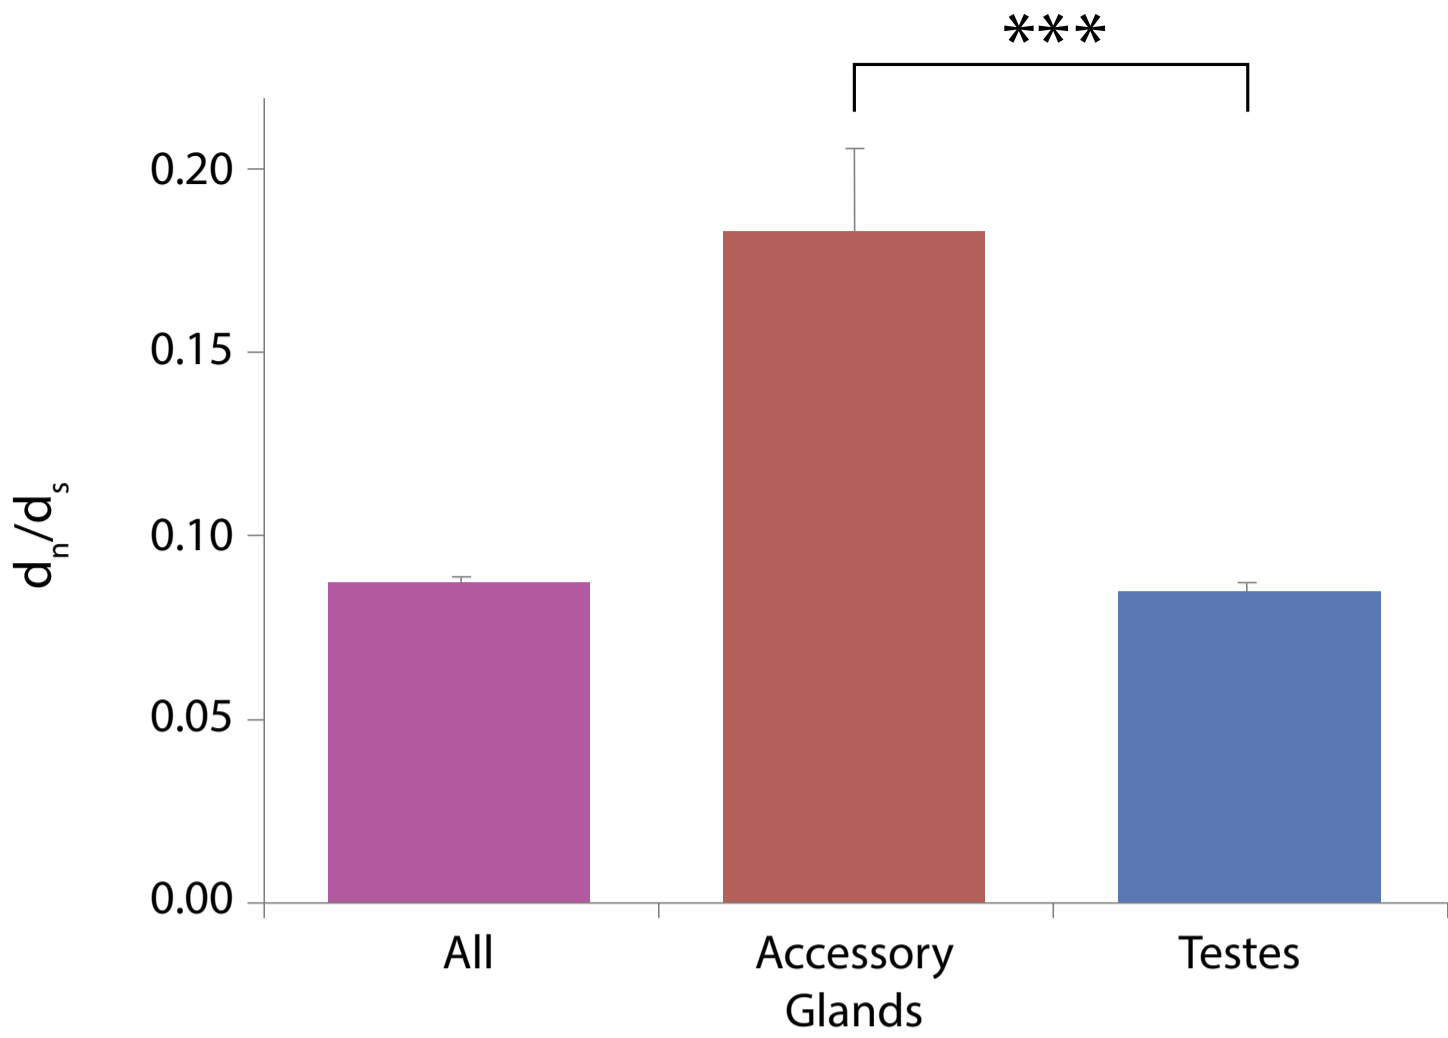

B.

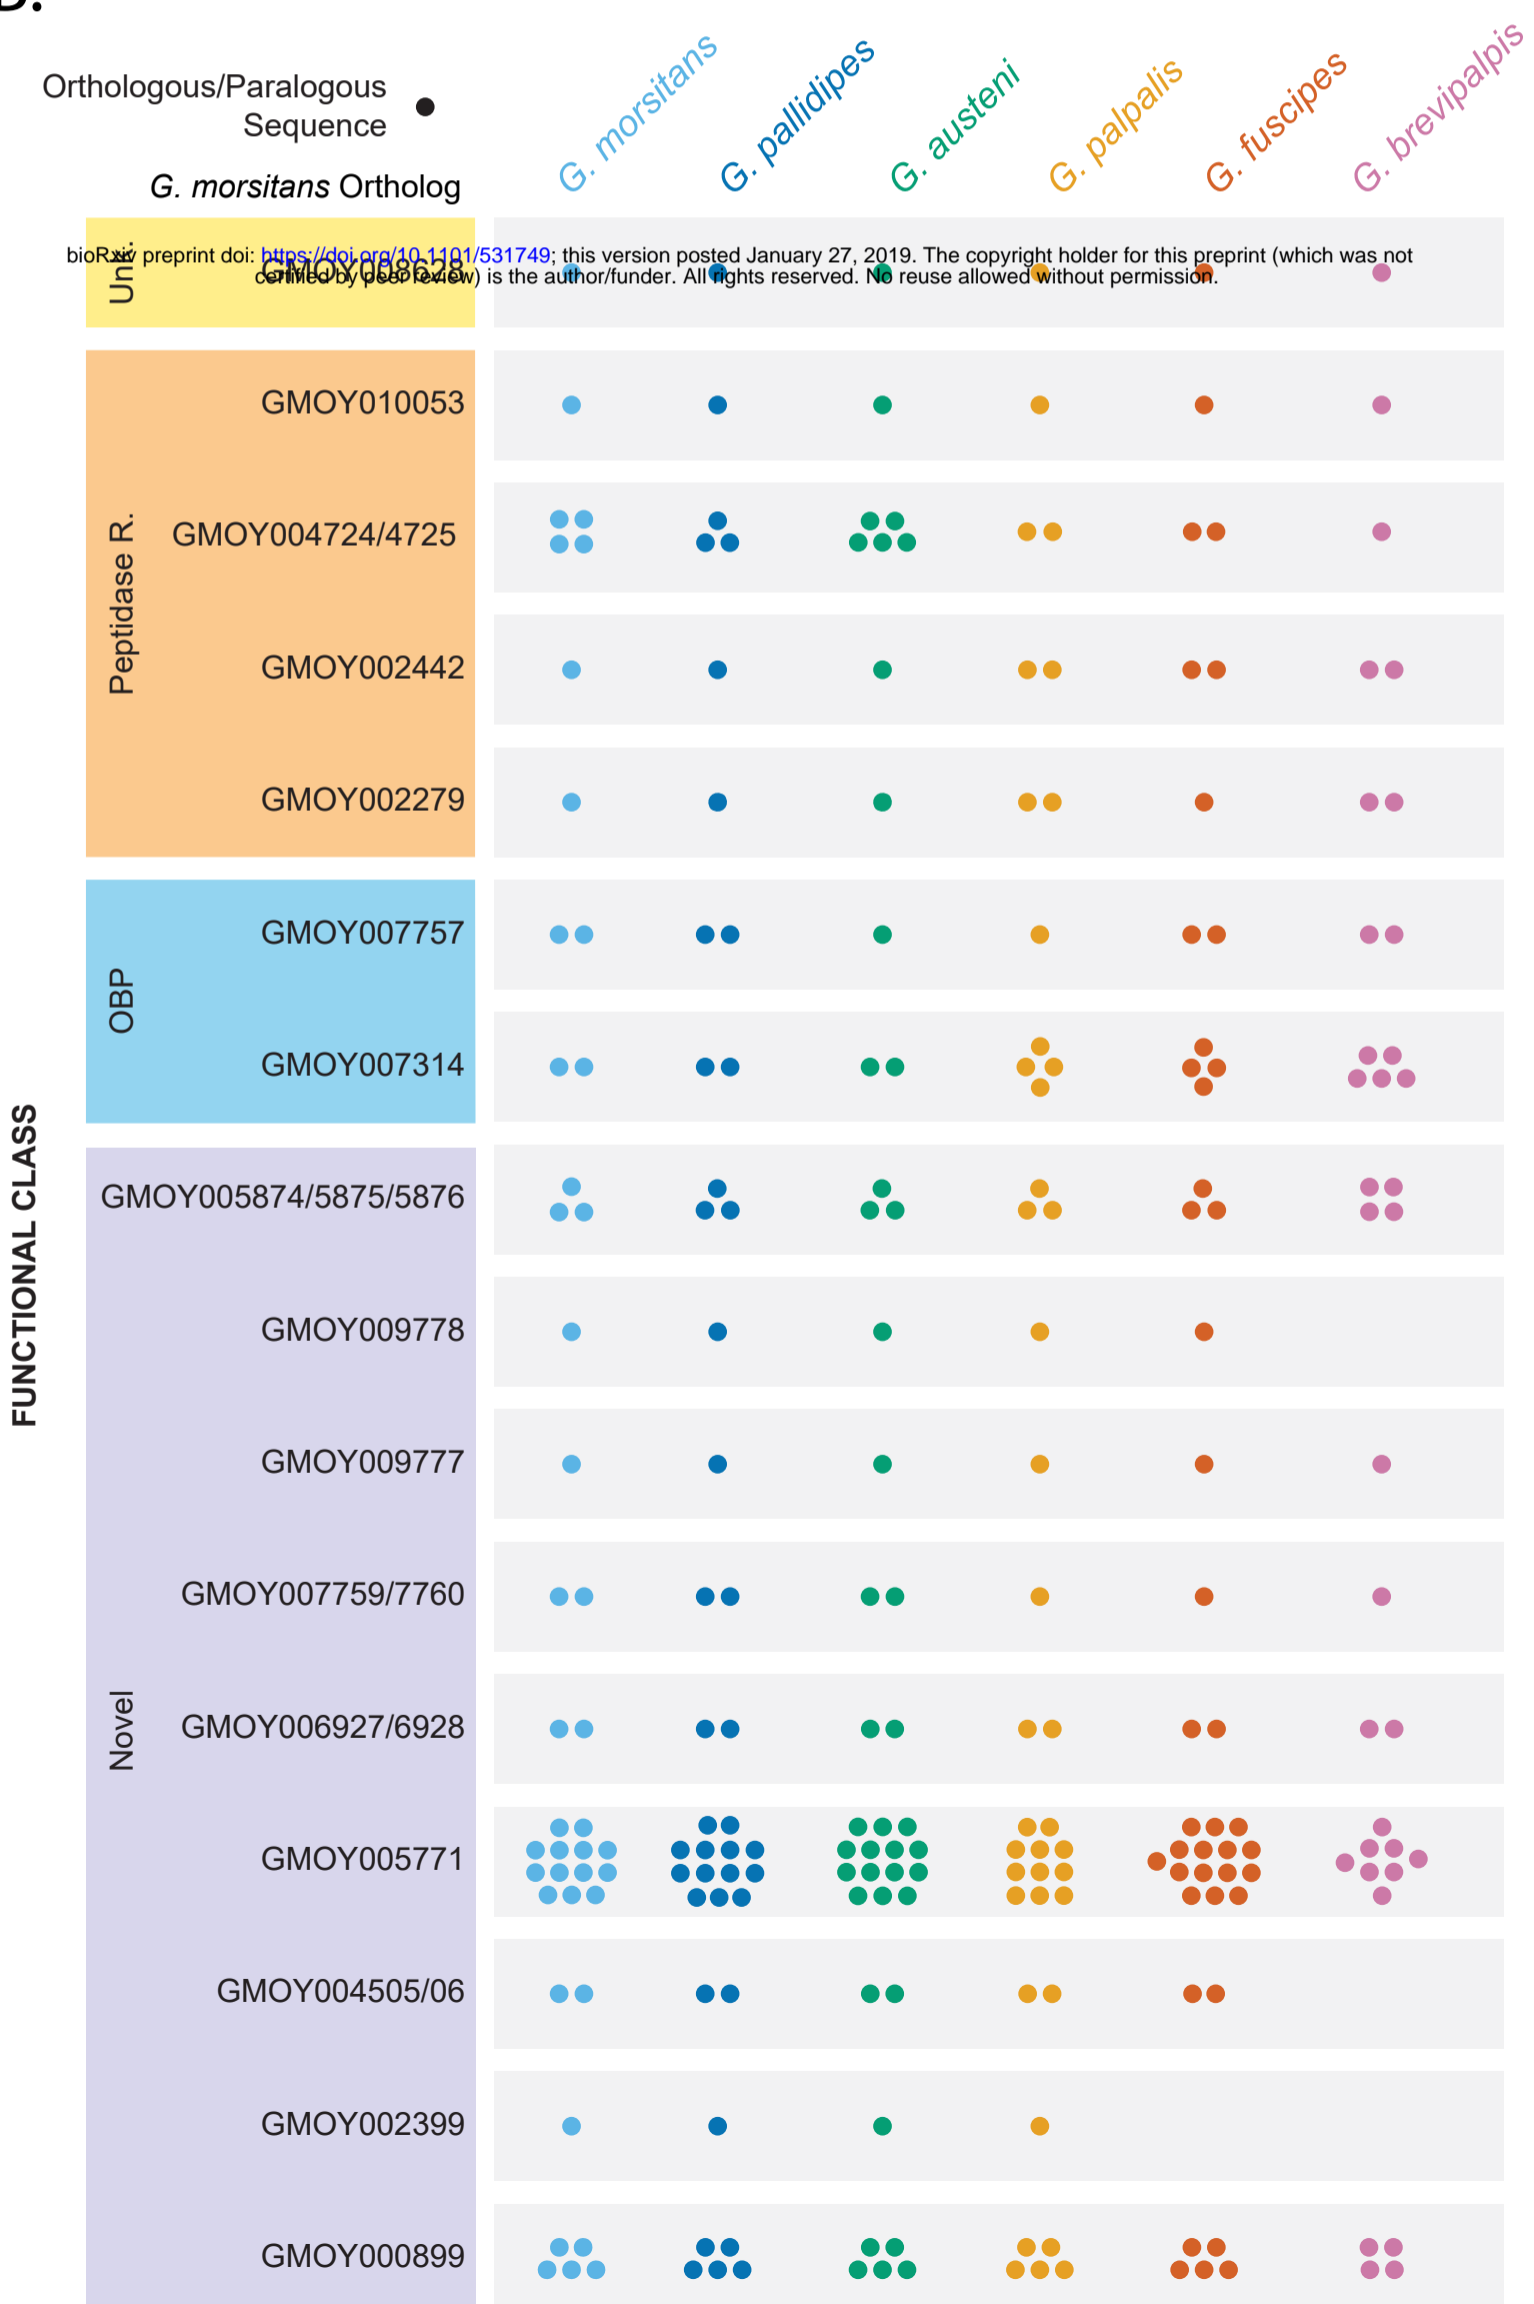

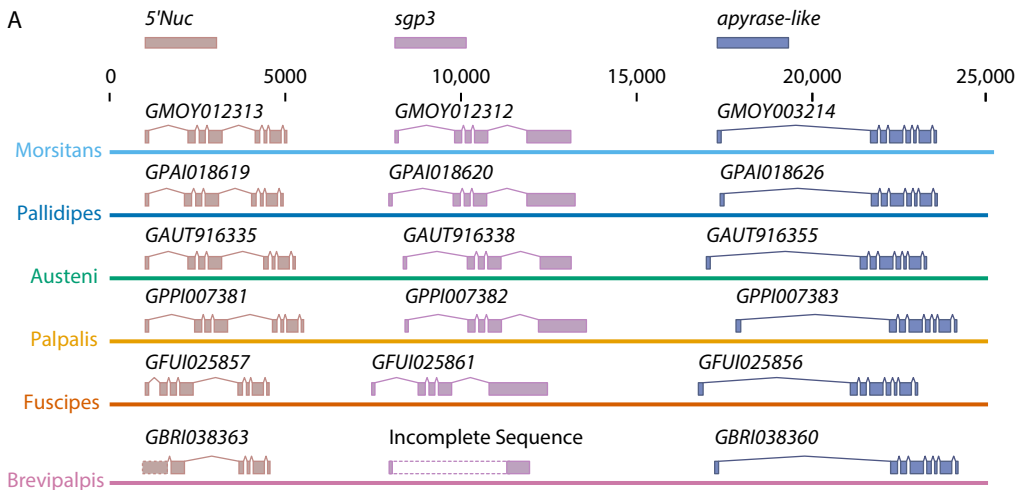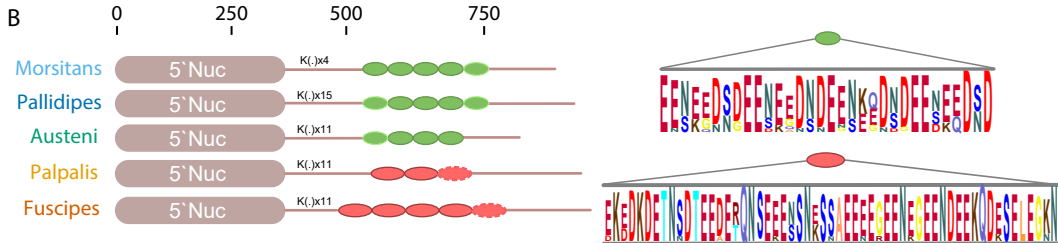

A

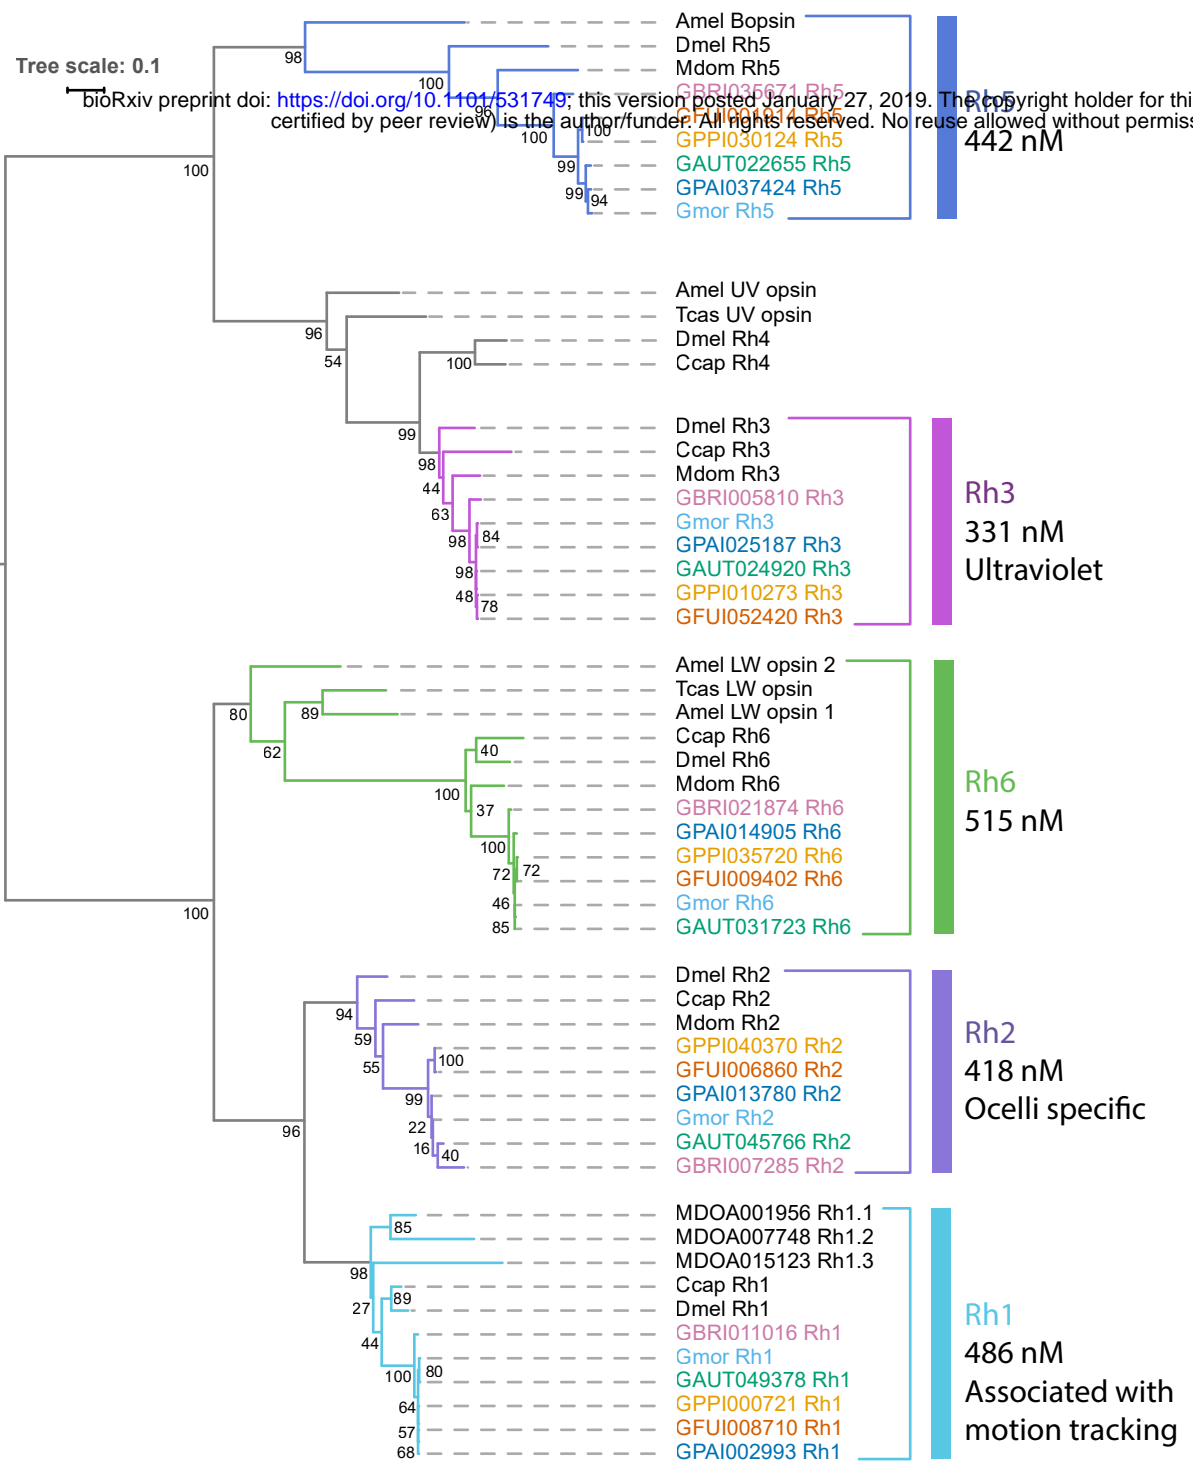

B

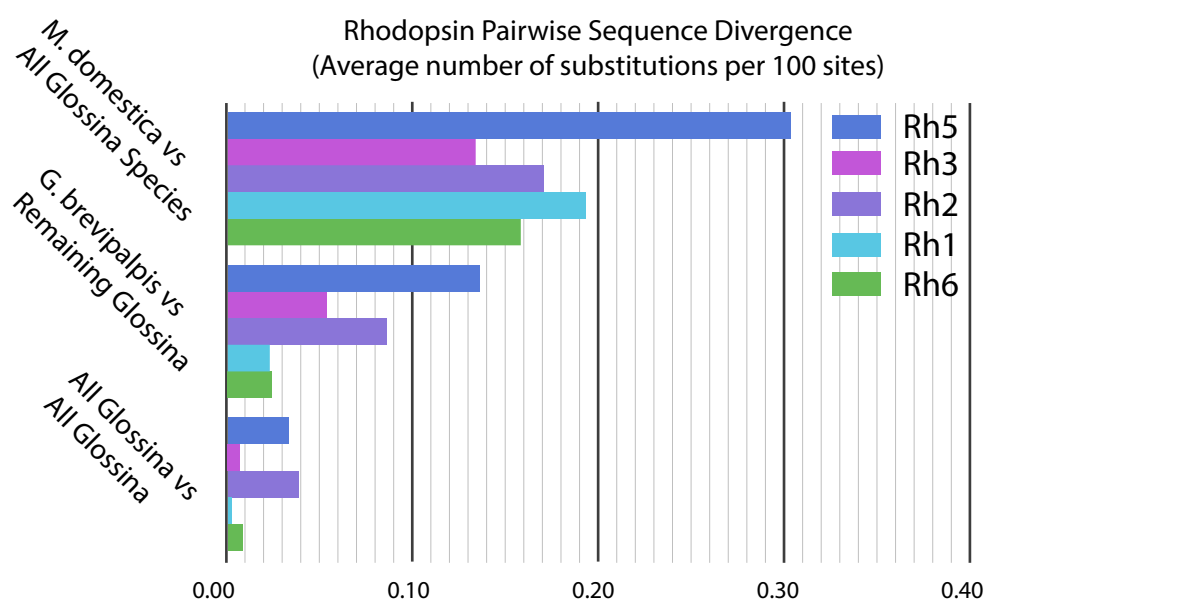

Source: https://biorxiv.org/content/biorxiv/early/2019/01/27/531749.full-text.pdf
